# Supplementary material for: Carbonyl (CO)/N-based thermally activated delayed fluorescent materials with high efficiency and fast reverse intersystem crossing rate: a theoretical design and study
Source: Royal Society of Chemistry journal article supplement (doi:10.1039/d3nj00423f), 2023-01-01
Supplement: d3nj00423f1.pdf [file d3nj00423f1.pdf]

## Carbonyl (C=O)/N-Based Thermally Activated Delayed Fluorescent Materials with High Efficiency and Fast Reverse Intersystem Crossing Rate: A Theoretical Design and Study

Shanshan Jiang<sup>1,2,3</sup>, Fangfang Qi<sup>2,3</sup>, Donghai Zhang<sup>2,3</sup>, Xin Lv<sup>2,3</sup>, Jinhui Song<sup>2,3</sup>, Junjing Gu<sup>4</sup>, Jinglin Chen<sup>\*1</sup>,  
Lingyi Meng<sup>\*1,2,3</sup>

1. Jiangxi Provincial Key Laboratory of Functional Molecular Materials Chemistry, Department of Material, Metallurgy and Chemistry, Jiangxi University of Science and Technology, Ganzhou, Jiangxi 341000, P. R. China
2. CAS Key Laboratory of Design and Assembly of Functional Nanostructures, and Fujian Provincial Key Laboratory of Nanomaterials, Fujian Institute of Research on the Structure of Matter, Chinese Academy of Sciences, Fuzhou, Fujian 350002, P. R. China
3. Xiamen Key Laboratory of Rare Earth Photoelectric Functional Materials, Xiamen Institute of Rare Earth Materials, Haixi Institutes, Chinese Academy of Sciences, Xiamen 361021, P. R. China
4. State Key Laboratory of Physical Chemistry of Solid Surfaces, Fujian Provincial Key Laboratory of Theoretical and Computational Chemistry and College of Chemistry and Chemical Engineering, Xiamen University, Xiamen, Fujian 361005, China

\*Corresponding authors. E-mail: [lymeng@fjirsm.ac.cn](mailto:lymeng@fjirsm.ac.cn) (L. Meng) and [gzchenjinglin@126.com](mailto:gzchenjinglin@126.com) (J.Chen)

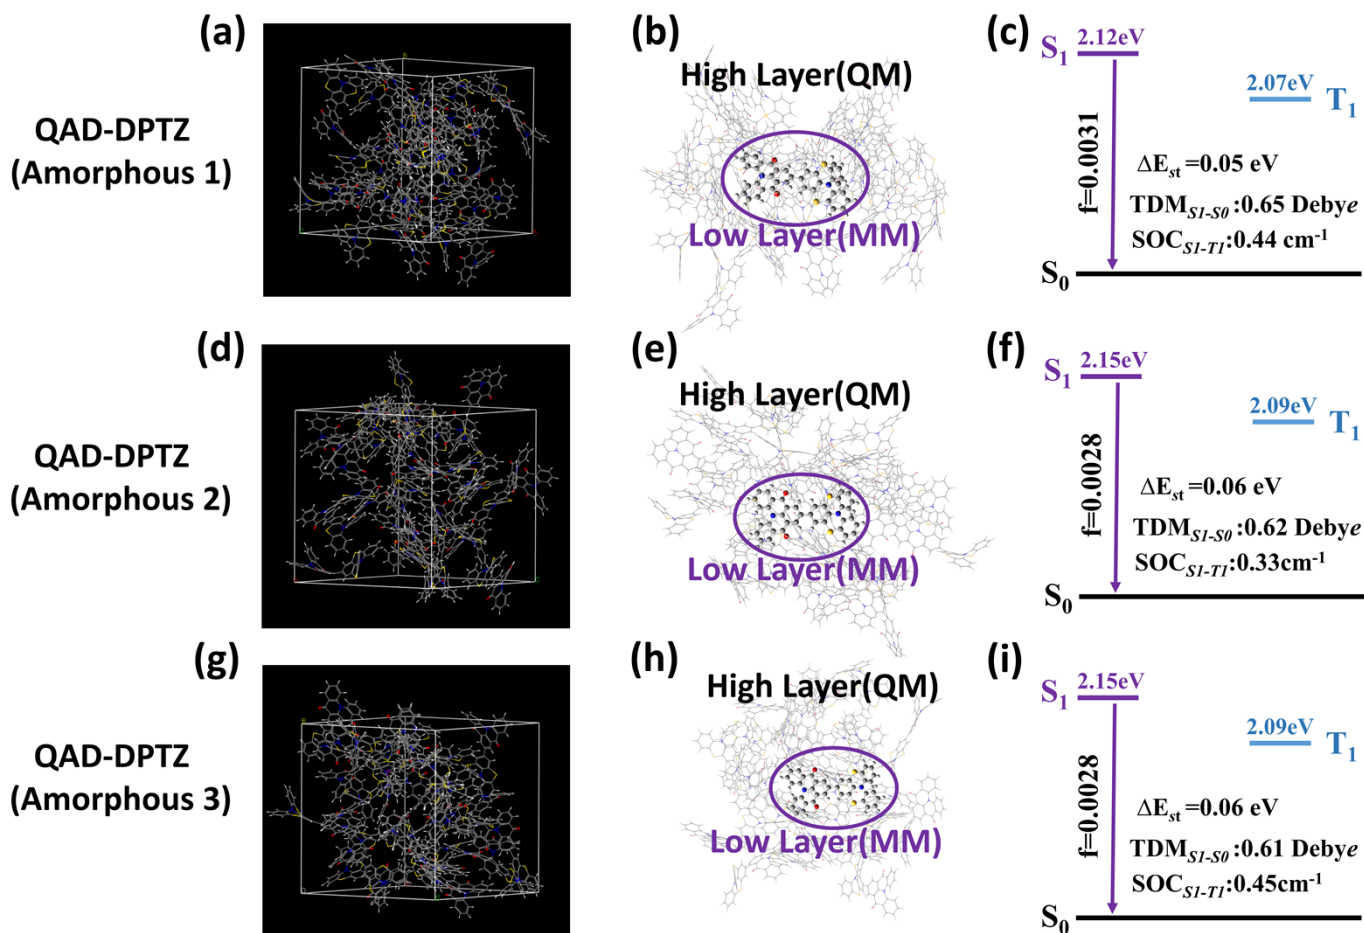

Figure S1. Three amorphous configurations of QAD-DPTZ for Amorphous 1(a), for Amorphous 2(d), and Amorphous 3(g) respectively. In the ONIOM model of Amorphous 1(b), Amorphous 2(e) and Amorphous 3(h), the centered molecule is treated as the high layer and surrounding molecules are regarded as the low layer. Calculated oscillator strengths (f), TDMs between  $S_0$  and  $S_1$ , SOC constants between  $S_1$  and  $T_1$  at the B3LYP/6-311g\*\* level for Amorphous 1(c), Amorphous 2(f) and Amorphous 3(i).

We calculate the excitation energies of  $S_1$ ,  $T_1$ ,  $T_2$  and  $T_3$  as shown in Table S1, and the spin-orbit coupling (SOC) constants between  $S_1-T_1$ ,  $S_1-T_2$  and  $S_1-T_3$  as shown in Table S2.

Table S1. The excitation energies of  $S_1$ ,  $T_1$ ,  $T_2$ ,  $T_3$  states at the B3LYP/6-311g\*\* level (the unit is eV).

|                 | $S_1$ | $T_1$ | $T_2$ | $T_3$ |
|-----------------|-------|-------|-------|-------|
| QAD-Cz<br>(gas) | 2.42  | 2.20  | 2.78  | 2.98  |
| QAD-TPA         | 2.18  | 2.00  | 2.64  | 2.73  |

|                           |      |      |      |      |
|---------------------------|------|------|------|------|
| (gas)                     |      |      |      |      |
| QAD-DPTZ<br>(gas)         | 2.14 | 2.09 | 2.56 | 2.76 |
| QAD-DPTZ<br>(Amorphous 1) | 2.12 | 2.07 | 2.44 | 2.65 |
| QAD-DPTZ<br>(Amorphous 2) | 2.15 | 2.09 | 2.47 | 2.91 |
| QAD-DPTZ<br>(Amorphous 3) | 2.15 | 2.09 | 2.48 | 2.95 |

Table S2. The spin-orbit coupling (SOC) constants between S1-T1, S1-T2 and S1-T3 at the level of B3LYP/G/6-311G\*\* with the ORCA software package (the unit is  $\text{cm}^{-1}$ ).

|                           | S1-T1 | S1-T2 | S1-T3 |
|---------------------------|-------|-------|-------|
| QAD-Cz<br>(gas)           | 0.27  | 0.57  | 0.68  |
| QAD-TPA<br>(gas)          | 0.16  | 0.79  | 0.23  |
| QAD-DPTZ<br>(gas)         | 0.30  | 0.48  | 0.67  |
| QAD-DPTZ<br>(Amorphous 1) | 0.44  | 0.80  | 0.39  |
| QAD-DPTZ<br>(Amorphous 2) | 0.33  | 0.52  | 0.70  |
| QAD-DPTZ<br>(Amorphous 3) | 0.45  | 0.75  | 0.56  |

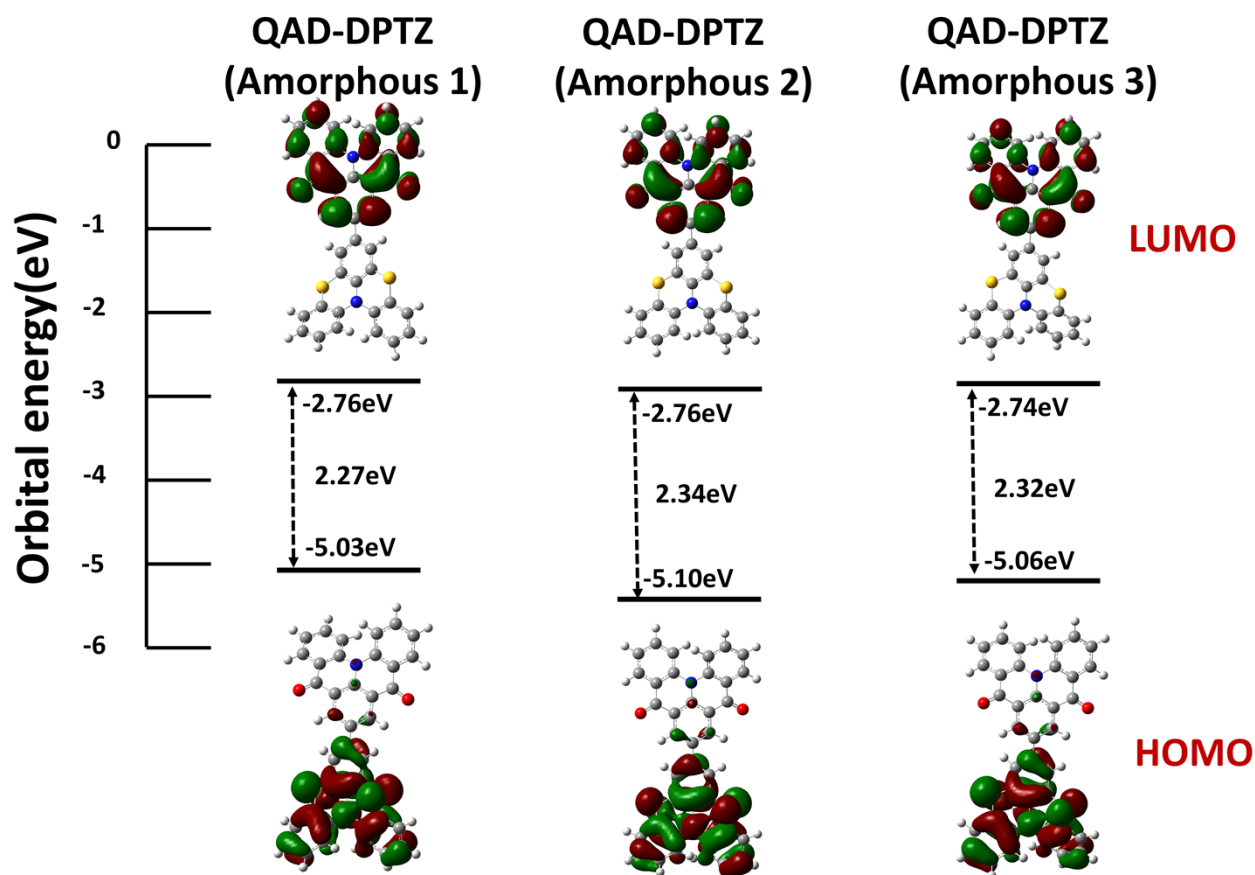

Figure S2. For QAD-DPTZ, the frontier molecular orbitals of Amorphous 1, Amorphous 2 and Amorphous 3 based on the optimized  $S_1$  geometries at the B3LYP/6-311g\*\* level.

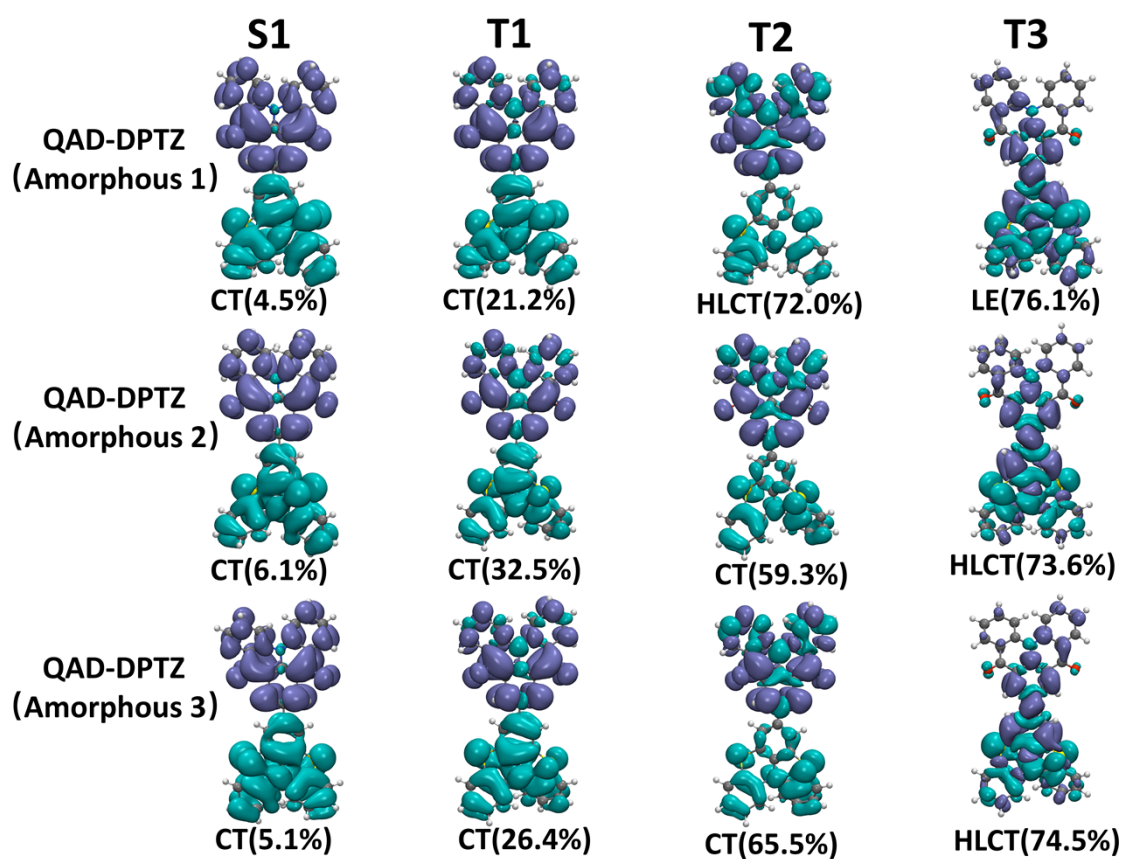

Figure S3. The hole-electron distribution and transition properties for the excited states of QAD-DPTZ in the amorphous state (isovalue=0.02) at the B3LYP/6-311g\*\* level. The blue represents hole and purple represents electron. The values in parentheses are the LE proportions in the excitation.

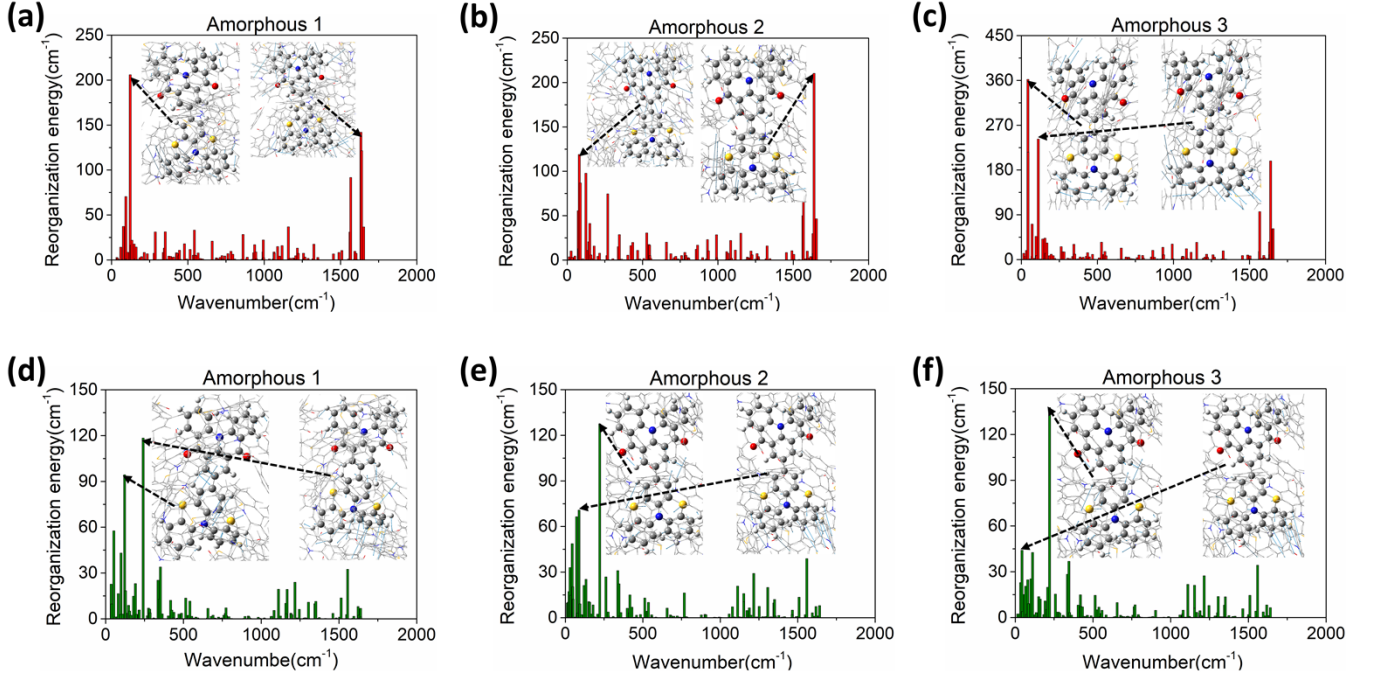

Figure S4. The reorganization energies with two key vibrational modes between S<sub>1</sub> and S<sub>0</sub> of QAD-DPTZ in the amorphous state for Amorphous 1(a), Amorphous 2(b) and Amorphous 3(c), and between S<sub>1</sub> and T<sub>1</sub> for Amorphous 1(d), Amorphous 2(e), and Amorphous 3(f) at the B3LYP/6-311g\*\* level.

The radiation rate can be calculated by integrating the emission spectrum.<sup>1, 2</sup>

$$k_r(T) = \int \sigma_{em}(\omega, T) d\omega \quad \text{S(1)}$$

The emission spectrum  $\sigma_{em}(\omega, T)$  can be expressed by the following formula:

$$\sigma_{em}(\omega, T) = \frac{4\omega^3}{3\hbar c^3} |\mu_{fi}|^2 \sum_{u,v} P_{iv} |\langle \Theta_{fu} | \Theta_{iv} \rangle|^2 \delta(\omega_{iv, fu} - \omega) \quad \text{S(2)}$$

where  $\hbar$  is Planck's constant,  $c$  is the speed of light, and  $\omega$  is frequency.  $\mu_{fi} = \langle \Phi_f | \hat{\mu} | \Phi_i \rangle$  represents the transition dipole moment between two electronic states  $P_{iv}$  represents the Boltzmann distribution function and  $\Theta$  represents the nuclear vibrational wave function. According to Fermi's Golden Rule and second-order perturbation theory, the non-radiative attenuation rate can be expressed as<sup>1, 3</sup>:

$$k_{nr} = \frac{2\pi}{\hbar} \sum_{v,u} P_{iv} \left| H_{fu,iu} + \sum_{n,\mu} \frac{H_{fu,n\mu} H_{n\mu,iv}}{E_{iv} - E_{n\mu}} \right|^2 \delta(E_{iv} - E_{fu}) \quad \text{S(3)}$$

Here,  $H'$  represents the interaction between two different states, and it can be expressed as:

$$\hat{H}' \psi_{iv} = \hat{H}^{BO} \Phi_i(r;Q) \Theta_v(Q) + \hat{H}^{SO} \Phi_i(r;Q) \Theta_v(Q) \quad \text{S(4)}$$

where  $\hat{H}^{BO}$  is the nonadiabatic coupling, and  $\hat{H}^{SO}$  is the spin-orbit coupling. The intersystem crossing rates  $K_{ISC}$  between S1 and T1 can be expressed as<sup>4-6</sup>:

$$K_{ISC} = \frac{1}{\hbar^2} \langle \Phi_f | H^{SO} | \Phi_i \rangle \int_{-\infty}^{+\infty} dt \left[ e^{i\omega_{if}t} Z_i^{-1} \rho_{ISC}(t,T) \right] \quad \text{S(5)}$$

where  $\rho_{ISC}(t,T)$  is the Franck-Condon overlap between singlet and triplet excited states, and  $Z_i$  is the distribution function.

The overall TADF quantum efficiency ( $\Phi$ ) is the sum of prompt fluorescence efficiency ( $\Phi_{PF}$ ) and delayed fluorescence efficiency ( $\Phi_{DF}$ ). They can be evaluated as

$$\Phi = \Phi_{PF} + \Phi_{DF} \quad \text{S(6)}$$

$$\Phi_{PF} = K_r^S / (K_r^S + K_{nr}^S + K_{ISC}) \quad \text{S(7)}$$

$$\Phi_{DF} = [\Phi_{ISC} \Phi_{RISC} / (1 - \Phi_{ISC} \Phi_{RISC})] \Phi_{PF} \quad \text{S(8)}$$

where  $\Phi_{ISC}$  is the intersystem crossing efficiency, and  $\Phi_{RISC}$  is the reverse intersystem crossing efficiency.

The  $\Phi_{ISC}$  and  $\Phi_{RISC}$  can be expressed as:

$$\Phi_{ISC} = K_{ISC} / (K_r^S + K_{nr}^S + K_{ISC}) \quad \text{S(9)}$$

$$\Phi_{RISC} = K_{RISC} / (K_r^T + K_{nr}^T + K_{RISC}) \quad \text{S(10)}$$

Coordinates of optimized molecular structures at the B3LYP/6-311g\*\* level (unit: Å)

**QAD-Cz, S<sub>0</sub>**

|   |            |             |             |
|---|------------|-------------|-------------|
| C | 3.26602500 | -3.28126100 | 1.04904800  |
| C | 2.56427600 | -2.09433600 | 0.82217100  |
| C | 3.22899000 | -0.98778500 | 0.25078400  |
| C | 4.59124600 | -1.11050600 | -0.09749700 |
| C | 5.25389000 | -2.32062200 | 0.11939300  |
| C | 4.60378400 | -3.40412200 | 0.69719000  |

|   |             |             |             |
|---|-------------|-------------|-------------|
| C | 1.13544200  | -2.01750800 | 1.18037600  |
| C | 4.64202100  | 1.32687900  | -0.55871500 |
| C | 1.13285900  | 0.19131400  | -0.01965900 |
| N | 2.54743600  | 0.21345000  | 0.03123200  |
| C | 3.30247000  | 1.40404300  | -0.13019400 |
| C | 0.42555600  | -0.85793000 | 0.59724800  |
| C | 5.32601500  | 0.02370300  | -0.69224600 |
| C | 5.38111800  | 2.50161800  | -0.75717700 |
| C | 4.82991400  | 3.74188200  | -0.49623000 |
| C | 3.52735300  | 3.81152300  | 0.00839400  |
| C | 2.77202000  | 2.66411400  | 0.19443500  |
| C | 0.40105300  | 1.15295100  | -0.73891000 |
| C | -0.98098300 | 1.11021000  | -0.76873000 |
| C | -1.69044700 | 0.11715100  | -0.07349600 |
| C | -0.97502200 | -0.86496700 | 0.59203200  |
| N | -3.10756200 | 0.10806000  | -0.09563200 |
| C | -3.93395900 | 1.16560800  | 0.30088600  |
| C | -5.28540800 | 0.78787800  | 0.11127700  |
| C | -5.27510100 | -0.55713600 | -0.42337500 |
| C | -3.91838700 | -0.94583600 | -0.53673100 |
| C | -3.59143700 | 2.40608500  | 0.83998100  |
| C | -4.62440500 | 3.27683700  | 1.17114200  |
| C | -5.96795000 | 2.92376400  | 0.97753600  |
| C | -6.30386700 | 1.68164900  | 0.45340000  |
| C | -6.28062600 | -1.44332600 | -0.81983400 |
| C | -5.92562800 | -2.68848200 | -1.32270100 |
| C | -4.57601600 | -3.05283500 | -1.43879800 |
| C | -3.55582200 | -2.19072600 | -1.05130500 |
| O | 0.56476400  | -2.88297200 | 1.82751400  |
| O | 6.44320700  | -0.09171300 | -1.17433300 |
| H | 2.72077200  | -4.09715800 | 1.50826300  |
| H | 6.29324100  | -2.37498400 | -0.18178500 |
| H | 5.13324800  | -4.33308200 | 0.86976500  |
| H | 6.40308300  | 2.38947000  | -1.09810900 |
| H | 5.40811700  | 4.64521000  | -0.64790300 |
| H | 3.09866200  | 4.77085700  | 0.27502400  |
| H | 1.78055200  | 2.74427900  | 0.61546600  |
| H | 0.91508700  | 1.91143300  | -1.31079100 |
| H | -1.52585500 | 1.83907800  | -1.35624900 |
| H | -1.47274300 | -1.67412700 | 1.11161000  |
| H | -2.55816700 | 2.68316200  | 1.00669700  |
| H | -4.38313700 | 4.24636900  | 1.59203500  |
| H | -6.74886600 | 3.62555600  | 1.24592800  |
| H | -7.34376600 | 1.40699000  | 0.31585400  |
| H | -7.32433300 | -1.16074700 | -0.73869200 |
| H | -6.69569100 | -3.38577500 | -1.63119300 |

|   |             |             |             |
|---|-------------|-------------|-------------|
| H | -4.31900700 | -4.02706800 | -1.83869700 |
| H | -2.51792700 | -2.48155200 | -1.15004300 |

**QAD-Cz, S<sub>1</sub>**

|   |             |             |             |
|---|-------------|-------------|-------------|
| C | 3.22641100  | -3.24815700 | 1.21166100  |
| C | 2.51659400  | -2.05987500 | 0.92579000  |
| C | 3.20360300  | -0.98544100 | 0.31214300  |
| C | 4.55933100  | -1.11809000 | -0.04106300 |
| C | 5.22910300  | -2.33533400 | 0.23253000  |
| C | 4.56540900  | -3.37638900 | 0.86190200  |
| C | 1.10062500  | -1.97194400 | 1.23103400  |
| C | 4.61998900  | 1.28926000  | -0.59522000 |
| C | 1.12569100  | 0.21006400  | -0.04337600 |
| N | 2.52212300  | 0.23010900  | 0.04524400  |
| C | 3.28324900  | 1.40562700  | -0.16346600 |
| C | 0.41963600  | -0.83722000 | 0.60267700  |
| C | 5.28869600  | -0.02246000 | -0.67475400 |
| C | 5.36082200  | 2.45477500  | -0.85346800 |
| C | 4.82103500  | 3.70898700  | -0.64073800 |
| C | 3.52416100  | 3.81782100  | -0.12246000 |
| C | 2.76639000  | 2.68111700  | 0.11871700  |
| C | 0.40785000  | 1.14687600  | -0.80807900 |
| C | -0.98030200 | 1.13573600  | -0.84669700 |
| C | -1.66366600 | 0.14850000  | -0.12126500 |
| C | -0.98511500 | -0.82561700 | 0.58096200  |
| N | -3.11026800 | 0.13020500  | -0.13785000 |
| C | -3.93168100 | 1.13212400  | 0.35382600  |
| C | -5.28834300 | 0.75807200  | 0.16384800  |
| C | -5.26313100 | -0.55289600 | -0.47515800 |
| C | -3.88839100 | -0.88926500 | -0.63775100 |
| C | -3.56641500 | 2.32862200  | 0.97817600  |
| C | -4.59401200 | 3.16843600  | 1.39922400  |
| C | -5.93356100 | 2.81842600  | 1.20885000  |
| C | -6.29243900 | 1.60588200  | 0.59294900  |
| C | -6.23133400 | -1.43361000 | -0.91410300 |
| C | -5.82379000 | -2.64258900 | -1.51048900 |
| C | -4.46984900 | -2.95830300 | -1.67126200 |
| C | -3.47655800 | -2.08709500 | -1.24229300 |
| O | 0.46271300  | -2.84301700 | 1.85587800  |
| O | 6.42341600  | -0.14924900 | -1.14577300 |
| H | 2.67857800  | -4.04332100 | 1.69915000  |
| H | 6.26791200  | -2.40403600 | -0.06086200 |
| H | 5.09305600  | -4.29858700 | 1.08128400  |
| H | 6.37729000  | 2.31765700  | -1.20184600 |
| H | 5.40636000  | 4.59956300  | -0.83910200 |
| H | 3.10993000  | 4.79158200  | 0.11348900  |



|   |             |             |             |
|---|-------------|-------------|-------------|
| H | 1.78057000  | 2.77966900  | 0.55148300  |
| H | 0.94172300  | 1.87908200  | -1.39606100 |
| H | -1.51585400 | 1.84431300  | -1.46536400 |
| H | -1.48545200 | -1.60830100 | 1.13878800  |
| H | -2.52651100 | 2.58142800  | 1.12843600  |
| H | -4.34986200 | 4.10362000  | 1.88635900  |
| H | -6.71243100 | 3.48976400  | 1.54833300  |
| H | -7.33710800 | 1.34831800  | 0.46768100  |
| H | -7.28568700 | -1.20931600 | -0.80829800 |
| H | -6.57645500 | -3.34095200 | -1.85444000 |
| H | -4.19072600 | -3.89446500 | -2.13666100 |
| H | -2.42740200 | -2.31633900 | -1.36085200 |

**QAD-Cz, T<sub>1</sub>**

|   |             |             |             |
|---|-------------|-------------|-------------|
| C | 3.31006500  | -3.36372500 | 0.77741300  |
| C | 2.57472600  | -2.17837100 | 0.62345800  |
| C | 3.24505400  | -1.02120800 | 0.16199400  |
| C | 4.61181400  | -1.06855300 | -0.17735400 |
| C | 5.30675800  | -2.28604200 | -0.05111300 |
| C | 4.65966600  | -3.41331700 | 0.43503000  |
| C | 1.14313600  | -2.15246600 | 0.92045900  |
| C | 4.59965600  | 1.39392400  | -0.42344500 |
| C | 1.13911500  | 0.16242500  | -0.07203600 |
| N | 2.52934800  | 0.19358100  | 0.03675300  |
| C | 3.25347400  | 1.40770500  | 0.00483900  |
| C | 0.43910300  | -0.97595300 | 0.45404600  |
| C | 5.31407900  | 0.12667900  | -0.65535300 |
| C | 5.29216200  | 2.60833400  | -0.52987700 |
| C | 4.69919600  | 3.80156600  | -0.15688200 |
| C | 3.39914600  | 3.79567800  | 0.36868100  |
| C | 2.68178700  | 2.61367100  | 0.45007000  |
| C | 0.41284900  | 1.18132600  | -0.71541700 |
| C | -0.96795400 | 1.17114000  | -0.73212500 |
| C | -1.67049700 | 0.11150800  | -0.09089200 |
| C | -0.96200700 | -0.93926000 | 0.48254200  |
| N | -3.07119700 | 0.11334200  | -0.08883100 |
| C | -3.89086600 | 1.23495200  | 0.14222900  |
| C | -5.24463600 | 0.84238600  | 0.03509500  |
| C | -5.25384000 | -0.57407600 | -0.27574300 |
| C | -3.90610300 | -0.99606900 | -0.33943200 |
| C | -3.53846700 | 2.53404700  | 0.51014400  |
| C | -4.56499200 | 3.45014600  | 0.72217400  |
| C | -5.90926500 | 3.08138000  | 0.59062400  |
| C | -6.25604400 | 1.77529200  | 0.25698600  |
| C | -6.27897400 | -1.48475200 | -0.52551800 |
| C | -5.95058600 | -2.79955000 | -0.84160100 |

|   |             |             |             |
|---|-------------|-------------|-------------|
| C | -4.61119500 | -3.19871600 | -0.92443600 |
| C | -3.57067400 | -2.30621000 | -0.68284800 |
| O | 0.54781000  | -3.12707200 | 1.42910800  |
| O | 6.45353300  | 0.09299300  | -1.11911600 |
| H | 2.78202200  | -4.22826500 | 1.15750800  |
| H | 6.35085600  | -2.29748500 | -0.33425400 |
| H | 5.20768100  | -4.34230200 | 0.54702500  |
| H | 6.31358300  | 2.56333300  | -0.88706200 |
| H | 5.24978200  | 4.73176100  | -0.23375300 |
| H | 2.95291900  | 4.71373400  | 0.73191200  |
| H | 1.69321400  | 2.61292400  | 0.88661200  |
| H | 0.94225700  | 1.96146600  | -1.24439900 |
| H | -1.51102900 | 1.91516200  | -1.29685300 |
| H | -1.46159100 | -1.75770900 | 0.98189800  |
| H | -2.50541500 | 2.82398700  | 0.64274000  |
| H | -4.31444500 | 4.46599500  | 1.00446200  |
| H | -6.68546500 | 3.81699500  | 0.76510900  |
| H | -7.29788600 | 1.48581800  | 0.18189400  |
| H | -7.31589800 | -1.17192600 | -0.48245700 |
| H | -6.73662900 | -3.51983700 | -1.03489800 |
| H | -4.37298000 | -4.22320600 | -1.18457000 |
| H | -2.54289600 | -2.62962000 | -0.76658000 |

**QAD-TPA, S<sub>0</sub>**

|   |             |             |             |
|---|-------------|-------------|-------------|
| C | -1.23621800 | -1.01716900 | 0.62225500  |
| C | -2.63018100 | -1.04403600 | 0.61582000  |
| C | -3.35113500 | 0.00003500  | 0.00015600  |
| C | -2.62985100 | 1.04403300  | -0.61520600 |
| C | -1.23587200 | 1.01698700  | -0.62118400 |
| C | -0.50378500 | -0.00014400 | 0.00063000  |
| C | -3.33613400 | -2.16365000 | 1.26993200  |
| C | -4.76845600 | 2.26333500  | -0.92130800 |
| C | -5.42626100 | -1.22256900 | 0.23469100  |
| N | -4.74868400 | 0.00009600  | -0.00011900 |
| C | -5.42606300 | 1.22282300  | -0.23516500 |
| C | -4.76904400 | -2.26309900 | 0.92119600  |
| C | -3.33544000 | 2.16374500  | -1.26952200 |
| C | -5.44476100 | 3.46268900  | -1.18667800 |
| C | -6.73959000 | 3.66242300  | -0.74731900 |
| C | -7.36187500 | 2.65930700  | 0.00329400  |
| C | -6.71948600 | 1.45871600  | 0.26194000  |
| C | -6.71947000 | -1.45836300 | -0.26296900 |
| C | -7.36211200 | -2.65887700 | -0.00450600 |
| C | -6.74026400 | -3.66197400 | 0.74646200  |
| C | -5.44558800 | -3.46234300 | 1.18636900  |

|   |             |             |             |
|---|-------------|-------------|-------------|
| O | -2.76649400 | -2.99002200 | 1.96834300  |
| O | -2.76545100 | 2.99008300  | -1.96770700 |
| C | 0.97780200  | -0.00029800 | 0.00074700  |
| C | 1.70735100  | -1.19780500 | -0.03801700 |
| C | 3.09479800  | -1.20364800 | -0.03048800 |
| C | 3.81545000  | -0.00058000 | 0.00050500  |
| C | 3.09505200  | 1.20262100  | 0.03178100  |
| C | 1.70759600  | 1.19704700  | 0.03951700  |
| N | 5.23078000  | -0.00069800 | 0.00036400  |
| C | 5.94869800  | 0.95805200  | 0.76930300  |
| C | 5.94885300  | -0.95866200 | -0.76920300 |
| C | 7.05722500  | 1.61779900  | 0.22256500  |
| C | 7.76563200  | 2.54536300  | 0.97960200  |
| C | 7.37376100  | 2.84284300  | 2.28357300  |
| C | 6.26717800  | 2.19321000  | 2.82790000  |
| C | 5.56327500  | 1.25163300  | 2.08418700  |
| C | 7.06025400  | -1.61525100 | -0.22439600 |
| C | 7.76905600  | -2.54198000 | -0.98206400 |
| C | 7.37487500  | -2.84187600 | -2.28478100 |
| C | 6.26550700  | -2.19540100 | -2.82718900 |
| C | 5.56112500  | -1.25464700 | -2.08290900 |
| H | -0.74075100 | -1.82204300 | 1.15168200  |
| H | -0.74016000 | 1.82181300  | -1.15045400 |
| H | -4.89874600 | 4.22650600  | -1.72676300 |
| H | -7.25427600 | 4.59334100  | -0.95209500 |
| H | -8.35549800 | 2.81996200  | 0.40615800  |
| H | -7.21108200 | 0.71443700  | 0.87099500  |
| H | -7.21071600 | -0.71409000 | -0.87231600 |
| H | -8.35556900 | -2.81944700 | -0.40781200 |
| H | -7.25511500 | -4.59282700 | 0.95112500  |
| H | -4.89990800 | -4.22620800 | 1.72672600  |
| H | 1.18329300  | -2.14555500 | -0.08405300 |
| H | 3.62849800  | -2.14533300 | -0.05754900 |
| H | 3.62893400  | 2.14420400  | 0.05884500  |
| H | 1.18372700  | 2.14489400  | 0.08569600  |
| H | 7.35856800  | 1.39788100  | -0.79433900 |
| H | 8.62091100  | 3.04761700  | 0.54128800  |
| H | 7.92375100  | 3.57083900  | 2.86834600  |
| H | 5.95596000  | 2.40869400  | 3.84406300  |
| H | 4.71213800  | 0.73991500  | 2.51670500  |
| H | 7.36349700  | -1.39356800 | 0.79155400  |
| H | 8.62653300  | -3.04170800 | -0.54515700 |
| H | 7.92519200  | -3.56923300 | -2.87003400 |
| H | 5.95241400  | -2.41268500 | -3.84239500 |
| H | 4.70788200  | -0.74540000 | -2.51416700 |

**QAD-TPA, S<sub>1</sub>**

|   |             |             |             |
|---|-------------|-------------|-------------|
| C | -1.19668300 | -1.03552100 | 0.61679900  |
| C | -2.60565700 | -1.05680500 | 0.62014800  |
| C | -3.31440100 | -0.00002300 | -0.00004900 |
| C | -2.60565400 | 1.05675900  | -0.62024300 |
| C | -1.19668100 | 1.03548800  | -0.61686900 |
| C | -0.49449900 | -0.00001300 | -0.00002700 |
| C | -3.30031200 | -2.16614100 | 1.26326500  |
| C | -4.72502600 | 2.25711600  | -0.93719200 |
| C | -5.38957400 | -1.22228100 | 0.23892400  |
| N | -4.70859000 | -0.00001400 | -0.00004000 |
| C | -5.38955200 | 1.22227400  | -0.23896400 |
| C | -4.72505300 | -2.25712900 | 0.93714900  |
| C | -3.30031000 | 2.16607300  | -1.26339700 |
| C | -5.42459000 | 3.44453300  | -1.22630900 |
| C | -6.71953600 | 3.63845200  | -0.78769500 |
| C | -7.33685800 | 2.64908000  | -0.01099300 |
| C | -6.67754500 | 1.45809900  | 0.26396200  |
| C | -6.67759900 | -1.45807400 | -0.26393600 |
| C | -7.33694300 | -2.64902300 | 0.01108400  |
| C | -6.71962300 | -3.63839300 | 0.78778900  |
| C | -5.42464900 | -3.44451000 | 1.22633700  |
| O | -2.70493800 | -3.02852400 | 1.93384700  |
| O | -2.70489300 | 3.02857700  | -1.93378400 |
| C | 0.98946400  | -0.00000900 | -0.00001600 |
| C | 1.71865700  | -1.20370600 | -0.02796200 |
| C | 3.10371000  | -1.21244400 | -0.03034400 |
| C | 3.80358500  | -0.00000200 | 0.00000400  |
| C | 3.10370400  | 1.21243700  | 0.03034000  |
| C | 1.71865000  | 1.20369300  | 0.02794000  |
| N | 5.23424900  | 0.00000100  | 0.00001200  |
| C | 5.92371300  | 0.79713600  | 0.92858600  |
| C | 5.92371800  | -0.79713700 | -0.92856600 |
| C | 7.12755100  | 1.43548000  | 0.56734800  |
| C | 7.78920700  | 2.22865900  | 1.49052800  |
| C | 7.27106800  | 2.39661300  | 2.77673600  |
| C | 6.07588100  | 1.76856000  | 3.13572300  |
| C | 5.39724600  | 0.97800700  | 2.22328100  |
| C | 7.12752600  | -1.43552100 | -0.56730700 |
| C | 7.78918500  | -2.22870200 | -1.49048600 |
| C | 7.27107400  | -2.39661500 | -2.77671000 |
| C | 6.07591400  | -1.76852200 | -3.13571600 |
| C | 5.39727700  | -0.97796800 | -2.22327400 |
| H | -0.70840700 | -1.84078100 | 1.14939300  |
| H | -0.70840200 | 1.84074500  | -1.14946600 |
| H | -4.88586700 | 4.20155400  | -1.78290600 |

|   |             |             |             |
|---|-------------|-------------|-------------|
| H | -7.24340500 | 4.56039300  | -1.01435600 |
| H | -8.32969700 | 2.80997000  | 0.39355700  |
| H | -7.15854100 | 0.71349100  | 0.88188600  |
| H | -7.15859800 | -0.71346500 | -0.88185500 |
| H | -8.32980800 | -2.80988700 | -0.39341300 |
| H | -7.24351600 | -4.56030800 | 1.01450100  |
| H | -4.88592700 | -4.20153600 | 1.78292600  |
| H | 1.18218900  | -2.14262100 | -0.05326200 |
| H | 3.64536100  | -2.15070300 | -0.03816100 |
| H | 3.64534900  | 2.15069900  | 0.03816200  |
| H | 1.18217900  | 2.14260400  | 0.05323100  |
| H | 7.50753700  | 1.33217600  | -0.44045600 |
| H | 8.70297000  | 2.73370000  | 1.20286000  |
| H | 7.79230600  | 3.01884300  | 3.49348000  |
| H | 5.67663400  | 1.89128700  | 4.13464500  |
| H | 4.47944700  | 0.47750700  | 2.50069000  |
| H | 7.50749100  | -1.33224600 | 0.44050800  |
| H | 8.70292600  | -2.73377300 | -1.20280500 |
| H | 7.79231200  | -3.01884500 | -3.49345300 |
| H | 5.67668800  | -1.89121900 | -4.13465000 |
| H | 4.47949700  | -0.47744000 | -2.50069400 |

**QAD-TPA, T<sub>1</sub>**

|   |             |             |             |
|---|-------------|-------------|-------------|
| C | -1.22959700 | -1.11926500 | 0.46569000  |
| C | -2.63121600 | -1.14680400 | 0.45059200  |
| C | -3.34483000 | -0.00001000 | -0.00003500 |
| C | -2.63121700 | 1.14678400  | -0.45066300 |
| C | -1.22959700 | 1.11925400  | -0.46574300 |
| C | -0.50411100 | -0.00000300 | -0.00002000 |
| C | -3.33509700 | -2.32848900 | 0.92921800  |
| C | -4.76454200 | 2.36856100  | -0.59397800 |
| C | -5.42015900 | -1.24249000 | 0.05127500  |
| N | -4.72416900 | -0.00000600 | -0.00002900 |
| C | -5.42014500 | 1.24248700  | -0.05130200 |
| C | -4.76455700 | -2.36856600 | 0.59394800  |
| C | -3.33510000 | 2.32845500  | -0.92931900 |
| C | -5.47078300 | 3.57650000  | -0.70454300 |
| C | -6.76473200 | 3.69230800  | -0.22693200 |
| C | -7.36961600 | 2.60042000  | 0.40573800  |
| C | -6.70322900 | 1.38514300  | 0.49561200  |
| C | -6.70326500 | -1.38513200 | -0.49558900 |
| C | -7.36967400 | -2.60039300 | -0.40566400 |
| C | -6.76478900 | -3.69228000 | 0.22700900  |
| C | -5.47081900 | -3.57648700 | 0.70456900  |
| O | -2.75417700 | -3.28049900 | 1.47253500  |

|   |             |             |             |
|---|-------------|-------------|-------------|
| O | -2.75415200 | 3.28053200  | -1.47248800 |
| C | 0.95373900  | -0.00000100 | -0.00001400 |
| C | 1.69963700  | -1.18459700 | 0.21006600  |
| C | 3.07756700  | -1.19283200 | 0.20596000  |
| C | 3.80558100  | -0.00000100 | -0.00000600 |
| C | 3.07756800  | 1.19283000  | -0.20597600 |
| C | 1.69963800  | 1.18459500  | -0.21009000 |
| N | 5.19965500  | 0.00000000  | -0.00000500 |
| C | 5.93632400  | 1.16886200  | 0.36773900  |
| C | 5.93632800  | -1.16886400 | -0.36773300 |
| C | 6.98535600  | 1.61677500  | -0.44226900 |
| C | 7.71493800  | 2.74262100  | -0.07506400 |
| C | 7.40358200  | 3.43439800  | 1.09434100  |
| C | 6.35872500  | 2.98755400  | 1.90152800  |
| C | 5.62989700  | 1.85676400  | 1.54762200  |
| C | 6.98536400  | -1.61676300 | 0.44227800  |
| C | 7.71494800  | -2.74261200 | 0.07508600  |
| C | 7.40359000  | -3.43440700 | -1.09430600 |
| C | 6.35872900  | -2.98757700 | -1.90149700 |
| C | 5.62990000  | -1.85678500 | -1.54760500 |
| H | -0.74731800 | -1.99141000 | 0.88150300  |
| H | -0.74731800 | 1.99139700  | -0.88156000 |
| H | -4.94571600 | 4.41315800  | -1.14842000 |
| H | -7.29469300 | 4.63421200  | -0.31077600 |
| H | -8.35731600 | 2.69671200  | 0.84079400  |
| H | -7.17023900 | 0.55585600  | 1.00667800  |
| H | -7.17028000 | -0.55584500 | -1.00665200 |
| H | -8.35739200 | -2.69667500 | -0.84067900 |
| H | -7.29476600 | -4.63417100 | 0.31089300  |
| H | -4.94575100 | -4.41314700 | 1.14844100  |
| H | 1.18330700  | -2.12041900 | 0.37374200  |
| H | 3.60809100  | -2.11975900 | 0.37835100  |
| H | 3.60809300  | 2.11975600  | -0.37836500 |
| H | 1.18330900  | 2.12041700  | -0.37376800 |
| H | 7.22148600  | 1.08297100  | -1.35469500 |
| H | 8.52320100  | 3.08537600  | -0.71074000 |
| H | 7.97180400  | 4.31310600  | 1.37567500  |
| H | 6.11605500  | 3.51284000  | 2.81805600  |
| H | 4.82753600  | 1.50033200  | 2.18210300  |
| H | 7.22149800  | -1.08294600 | 1.35469500  |
| H | 8.52321400  | -3.08535500 | 0.71076500  |
| H | 7.97181300  | -4.31311800 | -1.37562900 |
| H | 6.11605700  | -3.51287800 | -2.81801700 |
| H | 4.82753600  | -1.50036300 | -2.18208900 |

**QAD-DPTZ, S<sub>0</sub>**

|   |             |             |             |
|---|-------------|-------------|-------------|
| C | 1.56794100  | 1.16588400  | 0.25377200  |
| C | 2.96181700  | 1.18839200  | 0.24065300  |
| C | 3.68239600  | 0.00002600  | -0.00005000 |
| C | 2.96174800  | -1.18831800 | -0.24071800 |
| C | 1.56788400  | -1.16574900 | -0.25376000 |
| C | 0.83907400  | 0.00008900  | 0.00003100  |
| C | 3.66797100  | 2.46034700  | 0.49514200  |
| C | 5.10066300  | -2.44037700 | -0.13374700 |
| C | 5.75700300  | 1.23271000  | -0.17727100 |
| N | 5.07905000  | -0.00001700 | -0.00010300 |
| C | 5.75692300  | -1.23276900 | 0.17716800  |
| C | 5.10080300  | 2.44033300  | 0.13368100  |
| C | 3.66783700  | -2.46030700 | -0.49524000 |
| C | 5.77763500  | -3.66028300 | 0.00670300  |
| C | 7.07181300  | -3.70501700 | 0.48914900  |
| C | 7.69237400  | -2.51178200 | 0.87355300  |
| C | 7.04920600  | -1.29281400 | 0.72616700  |
| C | 7.04933500  | 1.29271500  | -0.72618000 |
| C | 7.69256600  | 2.51165400  | -0.87347700 |
| C | 7.07203800  | 3.70491300  | -0.48906500 |
| C | 5.77784600  | 3.66022200  | -0.00667800 |
| O | 3.09719400  | 3.46812000  | 0.88616600  |
| O | 3.09699900  | -3.46805300 | -0.88624100 |
| C | -0.64402800 | 0.00010500  | 0.00006900  |
| C | -1.36206600 | -1.10247800 | 0.47982600  |
| C | -2.75328300 | -1.08956900 | 0.50870200  |
| C | -3.46973700 | 0.00008400  | 0.00002700  |
| C | -2.75327900 | 1.08976700  | -0.50854700 |
| C | -1.36207000 | 1.10270200  | -0.47965400 |
| N | -4.88392800 | 0.00001500  | -0.00011000 |
| C | -5.57891000 | -1.20647000 | -0.27734800 |
| C | -5.57912100 | 1.20634800  | 0.27720200  |
| C | -5.08563500 | 2.42712800  | -0.20355000 |
| C | -5.73793800 | 3.62126600  | 0.10254800  |
| C | -6.90695600 | 3.60660700  | 0.85667900  |
| C | -7.40101100 | 2.39595900  | 1.33943200  |
| C | -6.73171900 | 1.20737400  | 1.07061300  |
| C | -6.73136200 | -1.20770800 | -1.07098400 |
| C | -7.40048600 | -2.39638700 | -1.33976700 |
| C | -6.90638900 | -3.60692600 | -0.85675700 |
| C | -5.73752800 | -3.62137000 | -0.10239800 |
| C | -5.08538700 | -2.42712300 | 0.20367200  |
| S | -3.64714300 | 2.43801800  | -1.26177700 |
| S | -3.64710100 | -2.43765000 | 1.26207300  |

|   |             |             |             |
|---|-------------|-------------|-------------|
| H | 1.07100000  | 2.09925900  | 0.49014700  |
| H | 1.07087000  | -2.09908900 | -0.49011500 |
| H | 5.23282200  | -4.55888500 | -0.25584900 |
| H | 7.58707800  | -4.65147400 | 0.59913900  |
| H | 8.68529200  | -2.53153600 | 1.30833000  |
| H | 7.53948500  | -0.39038600 | 1.06064700  |
| H | 7.53960300  | 0.39028100  | -1.06065300 |
| H | 8.68551400  | 2.53138900  | -1.30818800 |
| H | 7.58736900  | 4.65133900  | -0.59901300 |
| H | 5.23305700  | 4.55882600  | 0.25591200  |
| H | -0.83740000 | -1.96453300 | 0.87330100  |
| H | -0.83740300 | 1.96477300  | -0.87309500 |
| H | -5.32980600 | 4.55697600  | -0.26142800 |
| H | -7.41913500 | 4.53572400  | 1.07649500  |
| H | -8.29967900 | 2.37609200  | 1.94485700  |
| H | -7.10073000 | 0.26915500  | 1.46592400  |
| H | -7.10037500 | -0.26957500 | -1.46649400 |
| H | -8.29903900 | -2.37670200 | -1.94536800 |
| H | -7.41843700 | -4.53612200 | -1.07654400 |
| H | -5.32935800 | -4.55699000 | 0.26177100  |

**QAD-DPTZ, S<sub>1</sub>**

|   |             |             |             |
|---|-------------|-------------|-------------|
| C | 1.57049200  | -1.17755400 | -0.25831700 |
| C | 2.98030100  | -1.19884400 | -0.25270400 |
| C | 3.68906700  | -0.00000300 | 0.00001400  |
| C | 2.98029800  | 1.19883700  | 0.25273000  |
| C | 1.57048800  | 1.17754600  | 0.25833100  |
| C | 0.87026700  | -0.00000400 | 0.00000300  |
| C | 3.67378100  | -2.45505400 | -0.50852000 |
| C | 5.09913500  | 2.43783800  | 0.17178600  |
| C | 5.76391300  | -1.23501300 | 0.16112700  |
| N | 5.08327400  | 0.00000000  | 0.00001400  |
| C | 5.76390500  | 1.23501600  | -0.16111000 |
| C | 5.09914700  | -2.43783700 | -0.17177100 |
| C | 3.67377500  | 2.45504600  | 0.50855900  |
| C | 5.79789100  | 3.65580300  | 0.06803200  |
| C | 7.09276900  | 3.70114000  | -0.40959600 |
| C | 7.71035400  | 2.51645700  | -0.83160700 |
| C | 7.05181000  | 1.29967100  | -0.71343200 |
| C | 7.05182400  | -1.29966300 | 0.71343400  |
| C | 7.71037900  | -2.51644500 | 0.83159000  |
| C | 7.09279800  | -3.70112900 | 0.40957500  |
| C | 5.79791400  | -3.65579800 | -0.06803700 |
| O | 3.07736900  | -3.48624500 | -0.86775700 |
| O | 3.07734700  | 3.48625100  | 0.86772900  |
| C | -0.61457400 | -0.00000600 | -0.00000100 |



|                                |             |             |             |
|--------------------------------|-------------|-------------|-------------|
| C                              | -1.34031300 | 1.12398000  | -0.41772500 |
| C                              | -2.72837000 | 1.13287100  | -0.41626500 |
| C                              | -3.45798100 | -0.00000500 | -0.00000700 |
| C                              | -2.72837100 | -1.13288200 | 0.41624900  |
| C                              | -1.34031200 | -1.12399200 | 0.41771700  |
| N                              | -4.86644500 | -0.00000200 | -0.00000500 |
| C                              | -5.57867900 | 1.19708800  | 0.24118700  |
| C                              | -5.57868900 | -1.19708200 | -0.24118600 |
| C                              | -5.07715100 | -2.43703700 | 0.20405300  |
| C                              | -5.82138700 | -3.60354700 | -0.01071800 |
| C                              | -7.03144500 | -3.54907300 | -0.68101700 |
| C                              | -7.50634500 | -2.32693800 | -1.17250500 |
| C                              | -6.78892400 | -1.16549200 | -0.95835200 |
| C                              | -6.78889500 | 1.16550700  | 0.95838200  |
| C                              | -7.50630600 | 2.32695900  | 1.17254500  |
| C                              | -7.03140900 | 3.54908700  | 0.68104000  |
| C                              | -5.82136400 | 3.60355100  | 0.01071400  |
| C                              | -5.07714100 | 2.43703600  | -0.20406900 |
| S                              | -3.55258100 | -2.55362600 | 1.06858600  |
| S                              | -3.55258200 | 2.55360500  | -1.06862800 |
| H                              | 1.08347800  | -2.11003100 | -0.51144400 |
| H                              | 1.08347100  | 2.11002200  | 0.51145700  |
| H                              | 5.25855000  | 4.55020500  | 0.35482000  |
| H                              | 7.61608600  | 4.64756400  | -0.48787800 |
| H                              | 8.70295400  | 2.54065700  | -1.26681900 |
| H                              | 7.53286400  | 0.39779400  | -1.06386400 |
| H                              | 7.53287700  | -0.39778600 | 1.06386600  |
| H                              | 8.70298400  | -2.54064100 | 1.26679000  |
| H                              | 7.61612400  | -4.64755000 | 0.48784300  |
| H                              | 5.25857600  | -4.55020100 | -0.35482500 |
| H                              | -0.80537900 | 2.00162800  | -0.75541300 |
| H                              | -0.80538100 | -2.00164100 | 0.75540300  |
| H                              | -5.42764000 | -4.55131400 | 0.33535700  |
| H                              | -7.59282400 | -4.45936200 | -0.85024500 |
| H                              | -8.42820600 | -2.28853800 | -1.73892700 |
| H                              | -7.14441500 | -0.22431200 | -1.35535900 |
| H                              | -7.14438300 | 0.22433100  | 1.35540100  |
| H                              | -8.42815400 | 2.28856700  | 1.73898700  |
| H                              | -7.59277900 | 4.45938100  | 0.85027600  |
| H                              | -5.42761900 | 4.55131400  | -0.33537200 |
| <b>QAD-DPTZ, T<sub>1</sub></b> |             |             |             |
| C                              | 1.55823100  | -1.20744900 | -0.09662100 |
| C                              | 2.96101900  | -1.22917500 | -0.07413300 |
| C                              | 3.67299800  | -0.00000200 | -0.00003400 |
| C                              | 2.96102000  | 1.22917200  | 0.07406600  |

|   |             |             |             |
|---|-------------|-------------|-------------|
| C | 1.55823200  | 1.20744600  | 0.09656800  |
| C | 0.83834200  | -0.00000200 | -0.00002100 |
| C | 3.66603200  | -2.50023000 | -0.16396000 |
| C | 5.09550400  | 2.43489200  | -0.16552100 |
| C | 5.75128300  | -1.19541200 | 0.33495200  |
| N | 5.05568100  | -0.00000500 | -0.00002600 |
| C | 5.75129700  | 1.19540300  | -0.33497500 |
| C | 5.09548700  | -2.43489900 | 0.16549600  |
| C | 3.66603300  | 2.50022900  | 0.16386700  |
| C | 5.80408700  | 3.61719700  | -0.42834400 |
| C | 7.09865300  | 3.57836600  | -0.91722500 |
| C | 7.70291800  | 2.34434400  | -1.18534000 |
| C | 7.03546400  | 1.16121500  | -0.89871400 |
| C | 7.03542900  | -1.16122300 | 0.89873800  |
| C | 7.70286200  | -2.34435200 | 1.18541200  |
| C | 7.09859800  | -3.57837500 | 0.91730000  |
| C | 5.80404900  | -3.61720500 | 0.42837200  |
| O | 3.08539700  | -3.57380600 | -0.38568900 |
| O | 3.08542300  | 3.57379000  | 0.38573500  |
| C | -0.62730800 | -0.00000100 | -0.00001500 |
| C | -1.35939900 | 1.17696300  | -0.25605000 |
| C | -2.74357900 | 1.17411000  | -0.28356700 |
| C | -3.46763300 | 0.00000200  | -0.00000300 |
| C | -2.74357900 | -1.17410700 | 0.28355400  |
| C | -1.35939900 | -1.17696300 | 0.25602600  |
| N | -4.86799500 | 0.00000400  | 0.00000200  |
| C | -5.57589200 | 1.15088500  | 0.45027000  |
| C | -5.57589800 | -1.15087600 | -0.45025900 |
| C | -5.08515700 | -2.43549900 | -0.18089500 |
| C | -5.76420500 | -3.55890000 | -0.65441400 |
| C | -6.94258000 | -3.41176700 | -1.37720200 |
| C | -7.42532300 | -2.13484200 | -1.66114400 |
| C | -6.73929200 | -1.01192500 | -1.21588100 |
| C | -6.73928000 | 1.01193600  | 1.21590200  |
| C | -7.42530500 | 2.13485400  | 1.66117100  |
| C | -6.94256000 | 3.41177900  | 1.37722600  |
| C | -5.76419100 | 3.55890900  | 0.65442800  |
| C | -5.08515000 | 2.43550700  | 0.18090200  |
| S | -3.61792100 | -2.63500900 | 0.80669900  |
| S | -3.61792300 | 2.63501400  | -0.80670400 |
| H | 1.07313900  | -2.16373500 | -0.22732900 |
| H | 1.07314200  | 2.16373300  | 0.22727300  |
| H | 5.28099400  | 4.55076000  | -0.26265600 |
| H | 7.62990200  | 4.49994900  | -1.12561400 |
| H | 8.69029500  | 2.30229900  | -1.62933200 |
| H | 7.50029800  | 0.21439300  | -1.13213000 |

|   |             |             |             |
|---|-------------|-------------|-------------|
| H | 7.50026000  | -0.21440100 | 1.13215600  |
| H | 8.69022300  | -2.30230700 | 1.62944100  |
| H | 7.62983200  | -4.49995800 | 1.12572700  |
| H | 5.28095700  | -4.55076700 | 0.26267900  |
| H | -0.84052700 | 2.09825300  | -0.48180700 |
| H | -0.84052800 | -2.09825400 | 0.48177800  |
| H | -5.36297800 | -4.54480200 | -0.45152500 |
| H | -7.47011300 | -4.28891700 | -1.73198700 |
| H | -8.32873400 | -2.01007700 | -2.24604500 |
| H | -7.10106600 | -0.01990600 | -1.45416000 |
| H | -7.10105300 | 0.01991900  | 1.45418400  |
| H | -8.32871000 | 2.01009200  | 2.24608000  |
| H | -7.47008900 | 4.28893000  | 1.73201500  |
| H | -5.36296400 | 4.54481000  | 0.45153600  |

QAD-DPTZ (Amorphous 1), S<sub>0</sub>

|   |    |             |             |               |
|---|----|-------------|-------------|---------------|
| C | -1 | 14.40090200 | -2.86574600 | 3.58772600 L  |
| C | -1 | 13.84852400 | -3.28690800 | 2.37316900 L  |
| C | -1 | 13.06203400 | -4.45104700 | 2.32840600 L  |
| C | -1 | 12.86904400 | -5.20748700 | 3.50072900 L  |
| C | -1 | 13.42328600 | -4.77245000 | 4.71443700 L  |
| C | -1 | 14.16334200 | -3.58433200 | 4.77005600 L  |
| C | -1 | 14.01689300 | -2.48763000 | 1.14584300 L  |
| C | -1 | 11.73648500 | -7.00212300 | 2.10354800 L  |
| C | -1 | 12.25959100 | -3.85743900 | 0.04369700 L  |
| N | -1 | 12.44025500 | -4.85655600 | 1.08635200 L  |
| C | -1 | 12.00612700 | -6.23473600 | 0.94886100 L  |
| C | -1 | 13.09318100 | -2.71763700 | 0.02081200 L  |
| C | -1 | 12.08329100 | -6.45166800 | 3.42860300 L  |
| C | -1 | 11.23403100 | -8.30726400 | 1.97288800 L  |
| C | -1 | 11.04690700 | -8.86536600 | 0.71029400 L  |
| C | -1 | 11.40700200 | -8.15000100 | -0.42837800 L |
| C | -1 | 11.91478400 | -6.85587600 | -0.31101100 L |
| C | -1 | 11.21508800 | -3.94676900 | -0.89985000 L |
| C | -1 | 11.09362400 | -2.99882600 | -1.91918800 L |
| C | -1 | 11.97701100 | -1.92164300 | -1.98273900 L |
| C | -1 | 12.96084400 | -1.76731700 | -1.00580700 L |
| O | -1 | 14.87016200 | -1.61717100 | 1.08246100 L  |
| O | -1 | 11.76776400 | -7.04059300 | 4.44944100 L  |
| C | -1 | 14.66754400 | -3.06310900 | 6.05891700 L  |
| C | -1 | 15.30522700 | -3.90616700 | 6.98434400 L  |
| C | -1 | 15.90110700 | -3.37353400 | 8.13490600 L  |
| C | -1 | 15.88073000 | -1.98651400 | 8.34700800 L  |
| C | -1 | 15.21939500 | -1.14663000 | 7.44081500 L  |

|   |    |             |              |               |
|---|----|-------------|--------------|---------------|
| C | -1 | 14.57898900 | -1.68999000  | 6.33064200 L  |
| N | -1 | 16.62893100 | -1.40859500  | 9.41623300 L  |
| C | -1 | 16.69755300 | -2.07266100  | 10.68267800 L |
| C | -1 | 17.45726700 | -0.27792000  | 9.11312800 L  |
| C | -1 | 16.98042400 | 0.71851200   | 8.24587400 L  |
| C | -1 | 17.83585500 | 1.74419100   | 7.82694600 L  |
| C | -1 | 19.16638300 | 1.76549500   | 8.24978100 L  |
| C | -1 | 19.64277000 | 0.77265100   | 9.10910800 L  |
| C | -1 | 18.79128000 | -0.24149200  | 9.54621900 L  |
| C | -1 | 16.66647700 | -1.32761800  | 11.87303000 L |
| C | -1 | 16.74314900 | -1.97435500  | 13.10835200 L |
| C | -1 | 16.87387700 | -3.36337100  | 13.15985000 L |
| C | -1 | 16.92107200 | -4.10379200  | 11.97902300 L |
| C | -1 | 16.79632800 | -3.47068600  | 10.73890700 L |
| S | -1 | 15.28212800 | 0.65665700   | 7.61181100 L  |
| S | -1 | 16.80373900 | -4.49270700  | 9.24214200 L  |
| H | -1 | 14.99552300 | -1.96096700  | 3.61797700 L  |
| H | -1 | 13.25859100 | -5.34353300  | 5.61822500 L  |
| H | -1 | 11.02105400 | -8.90901400  | 2.84387500 L  |
| H | -1 | 10.67725400 | -9.87443600  | 0.61639300 L  |
| H | -1 | 11.31170800 | -8.60873500  | -1.40209300 L |
| H | -1 | 12.23964800 | -6.34357600  | -1.20517700 L |
| H | -1 | 10.48250700 | -4.73880200  | -0.84508900 L |
| H | -1 | 10.30494000 | -3.09195700  | -2.65436100 L |
| H | -1 | 11.87329100 | -1.18247700  | -2.76645100 L |
| H | -1 | 13.59268600 | -0.88806400  | -1.03076600 L |
| H | -1 | 15.38341900 | -4.96860700  | 6.78967700 L  |
| H | -1 | 14.07153800 | -1.02728100  | 5.63981500 L  |
| H | -1 | 17.48734800 | 2.49927800   | 7.13637300 L  |
| H | -1 | 19.83111200 | 2.54301500   | 7.89671100 L  |
| H | -1 | 20.67802600 | 0.77034600   | 9.41993000 L  |
| H | -1 | 19.18450500 | -1.02627000  | 10.18034000 L |
| H | -1 | 16.56606400 | -0.25022900  | 11.83977100 L |
| H | -1 | 16.70574200 | -1.39877000  | 14.02314300 L |
| H | -1 | 16.92746200 | -3.87245300  | 14.11149700 L |
| H | -1 | 17.03758200 | -5.17321300  | 12.03107000 L |
| C | -1 | 15.26428200 | -11.62231100 | -2.95898300 L |
| C | -1 | 16.43921800 | -11.24872600 | -2.28175400 L |
| C | -1 | 16.34622200 | -10.52125000 | -1.08634500 L |
| C | -1 | 15.09613800 | -10.31128000 | -0.49254700 L |
| C | -1 | 13.93503800 | -10.71545300 | -1.15135300 L |
| C | -1 | 13.99447200 | -11.27210300 | -2.44699600 L |
| C | -1 | 17.78195300 | -11.55231500 | -2.82069200 L |
| C | -1 | 16.11123800 | -8.52506600  | 0.96482300 L  |
| C | -1 | 18.81666800 | -10.48631000 | -0.81628700 L |
| N | -1 | 17.52196500 | -9.92026100  | -0.50265700 L |

|   |    |             |              |               |
|---|----|-------------|--------------|---------------|
| C | -1 | 17.33888500 | -8.72180400  | 0.29536700 L  |
| C | -1 | 18.97091900 | -11.26223500 | -1.98729400 L |
| C | -1 | 15.02657400 | -9.48971000  | 0.72656800 L  |
| C | -1 | 15.87642300 | -7.34273400  | 1.68282700 L  |
| C | -1 | 16.82920200 | -6.32442800  | 1.68012500 L  |
| C | -1 | 18.01373300 | -6.47753100  | 0.95559900 L  |
| C | -1 | 18.27557100 | -7.67166700  | 0.27555400 L  |
| C | -1 | 19.90032500 | -10.36171100 | 0.07208100 L  |
| C | -1 | 21.13592100 | -10.93403800 | -0.23638300 L |
| C | -1 | 21.30139300 | -11.64518500 | -1.42519200 L |
| C | -1 | 20.22624600 | -11.81238000 | -2.29985600 L |
| O | -1 | 17.90604000 | -12.06662500 | -3.91995200 L |
| O | -1 | 14.06578400 | -9.55587900  | 1.47414600 L  |
| C | -1 | 12.76182000 | -11.32304800 | -3.30598200 L |
| C | -1 | 11.47851000 | -11.22868100 | -2.73613100 L |
| C | -1 | 10.34922700 | -11.00174800 | -3.52292000 L |
| C | -1 | 10.46203300 | -10.93205700 | -4.92175100 L |
| C | -1 | 11.72456500 | -11.11195200 | -5.51414100 L |
| C | -1 | 12.85705100 | -11.29111000 | -4.71140800 L |
| N | -1 | 9.29695700  | -10.70742100 | -5.73037500 L |
| C | -1 | 8.02722600  | -11.25131100 | -5.31028800 L |
| C | -1 | 9.41336300  | -10.01663000 | -6.99099400 L |
| C | -1 | 10.51898100 | -10.23256000 | -7.83162500 L |
| C | -1 | 10.53165700 | -9.68740200  | -9.12235700 L |
| C | -1 | 9.50681900  | -8.83983400  | -9.54038100 L |
| C | -1 | 8.45653700  | -8.54396800  | -8.67568700 L |
| C | -1 | 8.39596900  | -9.14154100  | -7.41543300 L |
| C | -1 | 7.13627300  | -11.78329600 | -6.25876400 L |
| C | -1 | 5.89184000  | -12.28074500 | -5.86865900 L |
| C | -1 | 5.53008200  | -12.27590600 | -4.52274900 L |
| C | -1 | 6.42294800  | -11.79301900 | -3.56603200 L |
| C | -1 | 7.67433500  | -11.29441800 | -3.95053600 L |
| S | -1 | 11.96449100 | -11.17829900 | -7.30847700 L |
| S | -1 | 8.78639500  | -10.71669800 | -2.65599100 L |
| H | -1 | 15.34969200 | -12.15554900 | -3.89541000 L |
| H | -1 | 12.99645300 | -10.46217300 | -0.69043700 L |
| H | -1 | 14.93197400 | -7.18045900  | 2.18740800 L  |
| H | -1 | 16.63278800 | -5.40186200  | 2.21103200 L  |
| H | -1 | 18.73691000 | -5.67306900  | 0.93159000 L  |
| H | -1 | 19.18710200 | -7.75431000  | -0.30044400 L |
| H | -1 | 19.78623800 | -9.84154400  | 1.01333200 L  |
| H | -1 | 21.96364700 | -10.83544500 | 0.45381500 L  |
| H | -1 | 22.25677800 | -12.09248400 | -1.65456600 L |
| H | -1 | 20.36825300 | -12.39531700 | -3.20191600 L |
| H | -1 | 11.33101900 | -11.30783700 | -1.66977100 L |
| H | -1 | 13.81563500 | -11.34760700 | -5.20487900 L |

|   |    |             |              |                |
|---|----|-------------|--------------|----------------|
| H | -1 | 11.35767400 | -9.88827200  | -9.79233400 L  |
| H | -1 | 9.54052600  | -8.39001600  | -10.52357000 L |
| H | -1 | 7.69121900  | -7.84634500  | -8.98175200 L  |
| H | -1 | 7.55931800  | -8.91680500  | -6.76650900 L  |
| H | -1 | 7.42172200  | -11.82936400 | -7.29713500 L  |
| H | -1 | 5.21177600  | -12.67846700 | -6.60723600 L  |
| H | -1 | 4.56739600  | -12.66623200 | -4.21829400 L  |
| H | -1 | 6.15046500  | -11.83090700 | -2.52024900 L  |
| C | -1 | 12.64409100 | -2.03676400  | 17.15770300 L  |
| C | -1 | 12.88778100 | -3.14204400  | 17.98494200 L  |
| C | -1 | 12.14622900 | -4.32547200  | 17.80921700 L  |
| C | -1 | 11.16389500 | -4.39695900  | 16.80667400 L  |
| C | -1 | 10.97664300 | -3.30892500  | 15.94023400 L  |
| C | -1 | 11.68606400 | -2.11238500  | 16.13665000 L  |
| C | -1 | 13.91088300 | -3.09559000  | 19.04840600 L  |
| C | -1 | 10.27913300 | -6.51411700  | 17.90766400 L  |
| C | -1 | 13.65613400 | -5.54805600  | 19.35157400 L  |
| N | -1 | 12.37826400 | -5.45729200  | 18.67605200 L  |
| C | -1 | 11.30349700 | -6.41143700  | 18.87541600 L  |
| C | -1 | 14.36403600 | -4.36554600  | 19.64823700 L  |
| C | -1 | 10.28183300 | -5.58211900  | 16.75898300 L  |
| C | -1 | 9.24866600  | -7.45451400  | 18.07741300 L  |
| C | -1 | 9.21695300  | -8.26451100  | 19.21379700 L  |
| C | -1 | 10.19445700 | -8.13072100  | 20.19792200 L  |
| C | -1 | 11.22096700 | -7.19885200  | 20.04181800 L  |
| C | -1 | 14.25160700 | -6.78928000  | 19.64424900 L  |
| C | -1 | 15.45966900 | -6.84170300  | 20.34125000 L  |
| C | -1 | 16.07029900 | -5.66732300  | 20.77479700 L  |
| C | -1 | 15.53955000 | -4.42921500  | 20.40966200 L  |
| O | -1 | 14.40790200 | -2.03391700  | 19.38787000 L  |
| O | -1 | 9.52772400  | -5.75721900  | 15.81592500 L  |
| C | -1 | 11.36521300 | -0.91575800  | 15.33076800 L  |
| C | -1 | 11.29335400 | -0.99705200  | 13.93661900 L  |
| C | -1 | 10.97312200 | 0.12962900   | 13.17389200 L  |
| C | -1 | 10.61925900 | 1.33575500   | 13.81227400 L  |
| C | -1 | 10.67066000 | 1.41318000   | 15.21713000 L  |
| C | -1 | 11.08542800 | 0.30463000   | 15.96109900 L  |
| N | -1 | 10.18820800 | 2.46633100   | 13.04188700 L  |
| C | -1 | 10.80408900 | 2.73248900   | 11.76695400 L  |
| C | -1 | 9.14264900  | 3.32076600   | 13.55294900 L  |
| C | -1 | 9.05383700  | 3.60233200   | 14.92893900 L  |
| C | -1 | 8.05054400  | 4.45959200   | 15.40291200 L  |
| C | -1 | 7.11289600  | 5.00820700   | 14.52537600 L  |
| C | -1 | 7.17934800  | 4.71375900   | 13.16400800 L  |
| C | -1 | 8.18814200  | 3.87988500   | 12.67888300 L  |
| C | -1 | 11.02634400 | 4.05979900   | 11.35590800 L  |

|   |    |             |             |               |
|---|----|-------------|-------------|---------------|
| C | -1 | 11.60230700 | 4.33110700  | 10.11644300 L |
| C | -1 | 11.95669400 | 3.28513200  | 9.26781800 L  |
| C | -1 | 11.76819400 | 1.96337700  | 9.67224900 L  |
| C | -1 | 11.20767000 | 1.67865500  | 10.92421000 L |
| S | -1 | 10.22256700 | 2.91561600  | 16.12827400 L |
| S | -1 | 10.99564700 | -0.05977000 | 11.37359000 L |
| H | -1 | 13.20938500 | -1.12208700 | 17.29517300 L |
| H | -1 | 10.23633500 | -3.36998900 | 15.15385900 L |
| H | -1 | 8.46473300  | -7.55400400 | 17.33837700 L |
| H | -1 | 8.42300800  | -8.98404600 | 19.34395700 L |
| H | -1 | 10.15366400 | -8.74528500 | 21.08827700 L |
| H | -1 | 11.93656900 | -7.08567800 | 20.84291400 L |
| H | -1 | 13.79196800 | -7.71435400 | 19.32298900 L |
| H | -1 | 15.92005400 | -7.79259900 | 20.56091200 L |
| H | -1 | 16.98743300 | -5.71751500 | 21.34720500 L |
| H | -1 | 16.07864800 | -3.52724700 | 20.66669700 L |
| H | -1 | 11.51341400 | -1.93450200 | 13.43938800 L |
| H | -1 | 11.13259700 | 0.37877300  | 17.04102600 L |
| H | -1 | 7.98554300  | 4.68745300  | 16.45834000 L |
| H | -1 | 6.33119900  | 5.65664100  | 14.90091200 L |
| H | -1 | 6.44955900  | 5.13144800  | 12.48230200 L |
| H | -1 | 8.21685000  | 3.66042800  | 11.61935100 L |
| H | -1 | 10.76020600 | 4.88736500  | 12.00029500 L |
| H | -1 | 11.77208300 | 5.35336300  | 9.81753100 L  |
| H | -1 | 12.38085900 | 3.49898000  | 8.29860700 L  |
| H | -1 | 12.07117800 | 1.15808500  | 9.01425900 L  |
| C | -1 | 14.68991900 | 8.30906300  | -1.77150600 L |
| C | -1 | 14.31491900 | 9.66084300  | -1.88593100 L |
| C | -1 | 14.18206000 | 10.45433300 | -0.72892500 L |
| C | -1 | 14.40091000 | 9.87891700  | 0.53746900 L  |
| C | -1 | 14.75499900 | 8.52241100  | 0.63678700 L  |
| C | -1 | 14.91798900 | 7.73945800  | -0.51202700 L |
| C | -1 | 14.10841000 | 10.28548700 | -3.20790100 L |
| C | -1 | 13.58075800 | 12.03236200 | 1.61945500 L  |
| C | -1 | 14.01218100 | 12.52295900 | -2.11795600 L |
| N | -1 | 13.82415300 | 11.85612100 | -0.83941800 L |
| C | -1 | 13.29807500 | 12.53658900 | 0.33252000 L  |
| C | -1 | 14.05062300 | 11.75915900 | -3.30396800 L |
| C | -1 | 14.22482200 | 10.71207200 | 1.74405200 L  |
| C | -1 | 13.17431900 | 12.74799700 | 2.76054400 L  |
| C | -1 | 12.46099600 | 13.93979100 | 2.62608200 L  |
| C | -1 | 12.09828000 | 14.39290700 | 1.35922100 L  |
| C | -1 | 12.46702400 | 13.67182300 | 0.22397700 L  |
| C | -1 | 14.21189000 | 13.91767900 | -2.20766300 L |
| C | -1 | 14.27150000 | 14.54923000 | -3.45073100 L |
| C | -1 | 14.20355600 | 13.79682900 | -4.62166200 L |

|    |    |             |              |               |
|----|----|-------------|--------------|---------------|
| C  | -1 | 14.11640000 | 12.40534700  | -4.55185500 L |
| O  | -1 | 14.03459000 | 9.59631300   | -4.21219200 L |
| O  | -1 | 14.56390500 | 10.29642700  | 2.83834400 L  |
| C  | -1 | 15.51072400 | 6.39161200   | -0.39197700 L |
| C  | -1 | 14.81126400 | 5.32907900   | 0.19491800 L  |
| C  | -1 | 15.46491400 | 4.11786300   | 0.48156600 L  |
| C  | -1 | 16.83910900 | 3.97380900   | 0.19489500 L  |
| C  | -1 | 17.51757600 | 5.02528400   | -0.44515400 L |
| C  | -1 | 16.84833000 | 6.21357700   | -0.74556000 L |
| N  | -1 | 17.55069600 | 2.80094500   | 0.62275600 L  |
| C  | -1 | 17.17262800 | 2.17424300   | 1.86193100 L  |
| C  | -1 | 18.70655900 | 2.32199100   | -0.09843800 L |
| C  | -1 | 19.59301100 | 3.22003800   | -0.71478500 L |
| C  | -1 | 20.79911000 | 2.75783600   | -1.25563600 L |
| C  | -1 | 21.12069500 | 1.40371100   | -1.20458300 L |
| C  | -1 | 20.22265300 | 0.49416000   | -0.64880900 L |
| C  | -1 | 19.01661700 | 0.94542100   | -0.11162800 L |
| C  | -1 | 18.16111100 | 1.70737700   | 2.75026800 L  |
| C  | -1 | 17.80478200 | 0.98970800   | 3.88966500 L  |
| C  | -1 | 16.46497500 | 0.70471600   | 4.13724400 L  |
| C  | -1 | 15.47211600 | 1.20776400   | 3.29283000 L  |
| C  | -1 | 15.81775200 | 1.99473200   | 2.18437200 L  |
| S- | -1 | 19.28944800 | 4.99091300   | -0.78034400 L |
| S- | -1 | 14.49613700 | 2.76213300   | 1.20824900 L  |
| H  | -1 | 14.83847300 | 7.70837000   | -2.66056000 L |
| H  | -1 | 14.93973000 | 8.08182700   | 1.60601800 L  |
| H  | -1 | 13.39153700 | 12.37837100  | 3.75457800 L  |
| H  | -1 | 12.15420100 | 14.49242900  | 3.50534800 L  |
| H  | -1 | 11.52885800 | 15.30580900  | 1.25346700 L  |
| H  | -1 | 12.10742600 | 14.01423500  | -0.73677100 L |
| H  | -1 | 14.33896500 | 14.52485000  | -1.32147400 L |
| H  | -1 | 14.39242900 | 15.62301700  | -3.50365600 L |
| H  | -1 | 14.26391500 | 14.28944000  | -5.58422800 L |
| H  | -1 | 14.12608600 | 11.83444200  | -5.47097400 L |
| H  | -1 | 13.77190700 | 5.45753000   | 0.46523200 L  |
| H  | -1 | 17.39376800 | 7.03461000   | -1.19368700 L |
| H  | -1 | 21.49668700 | 3.45227400   | -1.70867400 L |
| H  | -1 | 22.06473800 | 1.06157900   | -1.59824900 L |
| H  | -1 | 20.46386000 | -0.56098700  | -0.62765500 L |
| H  | -1 | 18.34326000 | 0.22394700   | 0.33314600 L  |
| H  | -1 | 19.21046400 | 1.88288500   | 2.54762300 L  |
| H  | -1 | 18.56964200 | 0.63437600   | 4.56724900 L  |
| H  | -1 | 16.20253000 | 0.09651800   | 4.98640900 L  |
| H  | -1 | 14.43622100 | 0.98940400   | 3.51038700 L  |
| C  | -1 | 9.65204000  | -11.18085100 | 5.30136900 L  |
| C  | -1 | 10.29707000 | -12.33794800 | 4.82745100 L  |



|   |    |             |              |               |
|---|----|-------------|--------------|---------------|
| C | -1 | 10.14042000 | -12.72329100 | 3.48126400 L  |
| C | -1 | 9.40928800  | -11.90431800 | 2.60104600 L  |
| C | -1 | 8.81062300  | -10.72582100 | 3.07428100 L  |
| C | -1 | 8.90152700  | -10.38184200 | 4.42984200 L  |
| C | -1 | 11.13941900 | -13.16500000 | 5.71416800 L  |
| C | -1 | 9.44672200  | -13.77472100 | 0.88585500 L  |
| C | -1 | 11.75127700 | -14.60649100 | 3.77563200 L  |
| N | -1 | 10.69142300 | -13.97694800 | 3.01293400 L  |
| C | -1 | 10.10154700 | -14.58747300 | 1.83402200 L  |
| C | -1 | 11.91118200 | -14.28743400 | 5.14154700 L  |
| C | -1 | 9.21616700  | -12.35564200 | 1.20912100 L  |
| C | -1 | 8.89531000  | -14.34932400 | -0.27256200 L |
| C | -1 | 8.90076600  | -15.73502100 | -0.43471700 L |
| C | -1 | 9.46325900  | -16.55129600 | 0.54522600 L  |
| C | -1 | 10.05767000 | -15.98558900 | 1.67310700 L  |
| C | -1 | 12.67211000 | -15.48730300 | 3.17193700 L  |
| C | -1 | 13.64048400 | -16.13539100 | 3.93949700 L  |
| C | -1 | 13.72006700 | -15.90059600 | 5.31122200 L  |
| C | -1 | 12.86668400 | -14.97326700 | 5.91065600 L  |
| O | -1 | 11.25894500 | -12.87536400 | 6.89321900 L  |
| O | -1 | 8.80886500  | -11.58586400 | 0.35898400 L  |
| C | -1 | 8.13422900  | -9.23163100  | 4.94107900 L  |
| C | -1 | 6.99274500  | -9.44190700  | 5.72043000 L  |
| C | -1 | 6.14048600  | -8.38066300  | 6.03407500 L  |
| C | -1 | 6.48802700  | -7.06831000  | 5.66405100 L  |
| C | -1 | 7.69843900  | -6.84372500  | 4.98326700 L  |
| C | -1 | 8.47529800  | -7.92893000  | 4.57194500 L  |
| N | -1 | 5.59046600  | -5.98308600  | 5.93080000 L  |
| C | -1 | 4.17103300  | -6.20606400  | 5.79704400 L  |
| C | -1 | 6.11563800  | -4.69009900  | 6.29340800 L  |
| C | -1 | 7.34283700  | -4.23739100  | 5.77051800 L  |
| C | -1 | 7.82565100  | -2.96996200  | 6.12169600 L  |
| C | -1 | 7.09367500  | -2.14374400  | 6.97407300 L  |
| C | -1 | 5.88162300  | -2.58724800  | 7.50144000 L  |
| C | -1 | 5.40538300  | -3.86019100  | 7.18335600 L  |
| C | -1 | 3.34287800  | -5.21644500  | 5.23267400 L  |
| C | -1 | 1.96576200  | -5.42207800  | 5.12346200 L  |
| C | -1 | 1.40105300  | -6.62155600  | 5.55961400 L  |
| C | -1 | 2.21395100  | -7.61798200  | 6.10290300 L  |
| C | -1 | 3.59777800  | -7.42433500  | 6.20898100 L  |
| S | -1 | 8.29992200  | -5.19134100  | 4.56558800 L  |
| S | -1 | 4.59600800  | -8.76669900  | 6.89912200 L  |
| H | -1 | 9.72755200  | -10.89801300 | 6.34655300 L  |
| H | -1 | 8.22436200  | -10.10376200 | 2.40588500 L  |
| H | -1 | 8.40746600  | -13.73543700 | -1.01898700 L |
| H | -1 | 8.42399700  | -16.18045000 | -1.29714200 L |

|   |    |              |              |              |   |
|---|----|--------------|--------------|--------------|---|
| H | -1 | 9.43059000   | -17.62656200 | 0.43872300   | L |
| H | -1 | 10.44576900  | -16.64558700 | 2.43546900   | L |
| H | -1 | 12.64902200  | -15.67203900 | 2.10626000   | L |
| H | -1 | 14.33899600  | -16.81006600 | 3.46761400   | L |
| H | -1 | 14.47198200  | -16.40578300 | 5.90333000   | L |
| H | -1 | 12.98282000  | -14.76107900 | 6.96550100   | L |
| H | -1 | 6.72070600   | -10.44025000 | 6.02273800   | L |
| H | -1 | 9.34873200   | -7.75149100  | 3.96876900   | L |
| H | -1 | 8.76394400   | -2.61510500  | 5.71381100   | L |
| H | -1 | 7.46713400   | -1.15925200  | 7.22472400   | L |
| H | -1 | 5.31506700   | -1.94729100  | 8.16604700   | L |
| H | -1 | 4.47534000   | -4.19459100  | 7.62472800   | L |
| H | -1 | 3.76397900   | -4.28635200  | 4.87364100   | L |
| H | -1 | 1.33675800   | -4.64998400  | 4.70019100   | L |
| H | -1 | 0.33463800   | -6.78392600  | 5.46985700   | L |
| H | -1 | 1.76836800   | -8.55045600  | 6.42677300   | L |
| C | -1 | -11.21501500 | -0.53472900  | -11.06044600 | L |
| C | -1 | -11.76739200 | -0.95589100  | -12.27500200 | L |
| C | -1 | -12.55388200 | -2.12002900  | -12.31976600 | L |
| C | -1 | -12.74687200 | -2.87647000  | -11.14744200 | L |
| C | -1 | -12.19263100 | -2.44143300  | -9.93373400  | L |
| C | -1 | -11.45257500 | -1.25331500  | -9.87811600  | L |
| C | -1 | -11.59902400 | -0.15661300  | -13.50232900 | L |
| C | -1 | -13.87934500 | -4.67111300  | -12.54457400 | L |
| C | -1 | -13.35632600 | -1.52642200  | -14.60447500 | L |
| N | -1 | -13.17566200 | -2.52553900  | -13.56181900 | L |
| C | -1 | -13.60979000 | -3.90371900  | -13.69931100 | L |
| C | -1 | -12.52264900 | -0.38662700  | -14.62731000 | L |
| C | -1 | -13.53262600 | -4.12065100  | -11.21956800 | L |
| C | -1 | -14.38188600 | -5.97624700  | -12.67528300 | L |
| C | -1 | -14.56901000 | -6.53434800  | -13.93787800 | L |
| C | -1 | -14.20882800 | -5.81899200  | -15.07650000 | L |
| C | -1 | -13.70113200 | -4.52485900  | -14.95918300 | L |
| C | -1 | -14.40082800 | -1.61575200  | -15.54802100 | L |
| C | -1 | -14.52220600 | -0.66781700  | -16.56731000 | L |
| C | -1 | -13.63890600 | 0.40937400   | -16.63091000 | L |
| C | -1 | -12.65507300 | 0.56370000   | -15.65397800 | L |
| O | -1 | -10.74566800 | 0.71383800   | -13.56566100 | L |
| O | -1 | -13.84815300 | -4.70957500  | -10.19873100 | L |
| C | -1 | -10.94837300 | -0.73209200  | -8.58925400  | L |
| C | -1 | -10.31060300 | -1.57515800  | -7.66377900  | L |
| C | -1 | -9.71480900  | -1.04251700  | -6.51326500  | L |
| C | -1 | -9.73510000  | 0.34449500   | -6.30111400  | L |
| C | -1 | -10.39652200 | 1.18438800   | -7.20735700  | L |
| C | -1 | -11.03692700 | 0.64102800   | -8.31752900  | L |
| N | -1 | -8.98698600  | 0.92242200   | -5.23193800  | L |

|   |    |              |             |                |
|---|----|--------------|-------------|----------------|
| C | -1 | -8.91836400  | 0.25835600  | -3.96549400 L  |
| C | -1 | -8.15856400  | 2.05309000  | -5.53499400 L  |
| C | -1 | -8.63549300  | 3.04952900  | -6.40229800 L  |
| C | -1 | -7.78006200  | 4.07520800  | -6.82122600 L  |
| C | -1 | -6.44953300  | 4.09651200  | -6.39839000 L  |
| C | -1 | -5.97306000  | 3.10366000  | -5.53901400 L  |
| C | -1 | -6.82455000  | 2.08951700  | -5.10190300 L  |
| C | -1 | -8.94944000  | 1.00339900  | -2.77514100 L  |
| C | -1 | -8.87276800  | 0.35666200  | -1.53982000 L  |
| C | -1 | -8.74195400  | -1.03236200 | -1.48827200 L  |
| C | -1 | -8.69484500  | -1.77277500 | -2.66914900 L  |
| C | -1 | -8.81958800  | -1.13966900 | -3.90926500 L  |
| S | -1 | -10.33378900 | 2.98767400  | -7.03636100 L  |
| S | -1 | -8.81217700  | -2.16169000 | -5.40602900 L  |
| H | -1 | -10.62039400 | 0.37005000  | -11.03019500 L |
| H | -1 | -12.35732600 | -3.01251600 | -9.02994700 L  |
| H | -1 | -14.59486300 | -6.57799700 | -11.80429700 L |
| H | -1 | -14.93866300 | -7.54341800 | -14.03177800 L |
| H | -1 | -14.30420900 | -6.27771700 | -16.05026400 L |
| H | -1 | -13.37626800 | -4.01255900 | -15.85334800 L |
| H | -1 | -15.13332300 | -2.40779300 | -15.49321100 L |
| H | -1 | -15.31097600 | -0.76094000 | -17.30253200 L |
| H | -1 | -13.74254000 | 1.14853200  | -17.41457300 L |
| H | -1 | -12.02314400 | 1.44294600  | -15.67888800 L |
| H | -1 | -10.23249700 | -2.63759000 | -7.85849400 L  |
| H | -1 | -11.54437900 | 1.30373700  | -9.00835600 L  |
| H | -1 | -8.12856900  | 4.83029500  | -7.51179900 L  |
| H | -1 | -5.78471800  | 4.87402500  | -6.75141100 L  |
| H | -1 | -4.93780500  | 3.10135500  | -5.22819200 L  |
| H | -1 | -6.43132600  | 1.30473900  | -4.46778200 L  |
| H | -1 | -9.04985300  | 2.08078800  | -2.80840100 L  |
| H | -1 | -8.91017400  | 0.93224700  | -0.62502800 L  |
| H | -1 | -8.68845500  | -1.54143500 | -0.53667500 L  |
| H | -1 | -8.57824800  | -2.84220300 | -2.61705200 L  |
| C | -1 | 8.24566500   | -5.85401200 | -6.29984900 L  |
| C | -1 | 6.98841500   | -5.27923100 | -6.07821200 L  |
| C | -1 | 6.60506400   | -4.92442200 | -4.77767700 L  |
| C | -1 | 7.51327200   | -5.07272000 | -3.71847200 L  |
| C | -1 | 8.81152900   | -5.54315600 | -3.96975300 L  |
| C | -1 | 9.18902700   | -5.98236100 | -5.25954100 L  |
| C | -1 | 6.06846400   | -4.99607100 | -7.19827700 L  |
| C | -1 | 5.59145600   | -4.75261400 | -2.09755500 L  |
| C | -1 | 4.54240800   | -3.81805600 | -5.62268200 L  |
| N | -1 | 5.27554000   | -4.41795000 | -4.52498800 L  |
| C | -1 | 4.71851700   | -4.59869000 | -3.19713200 L  |
| C | -1 | 4.88493600   | -4.14936500 | -6.95215800 L  |

|   |    |             |              |                |
|---|----|-------------|--------------|----------------|
| C | -1 | 7.04427600  | -4.79188400  | -2.34662100 L  |
| C | -1 | 5.07472100  | -5.02509200  | -0.82019400 L  |
| C | -1 | 3.70225000  | -5.19357400  | -0.64244900 L  |
| C | -1 | 2.83706600  | -5.07649900  | -1.72689700 L  |
| C | -1 | 3.33788800  | -4.79005200  | -2.99906100 L  |
| C | -1 | 3.55948400  | -2.83602000  | -5.39847600 L  |
| C | -1 | 2.87150600  | -2.26348400  | -6.47077000 L  |
| C | -1 | 3.15672500  | -2.65836600  | -7.77783900 L  |
| C | -1 | 4.16457600  | -3.59183300  | -8.02174000 L  |
| O | -1 | 6.32341500  | -5.38990200  | -8.32514300 L  |
| O | -1 | 7.83574400  | -4.66012200  | -1.42810000 L  |
| C | -1 | 10.55274800 | -6.56325000  | -5.52284600 L  |
| C | -1 | 11.34364600 | -7.06504200  | -4.47297300 L  |
| C | -1 | 12.63581400 | -7.54565300  | -4.70229300 L  |
| C | -1 | 13.12849500 | -7.65222500  | -6.01306300 L  |
| C | -1 | 12.34078800 | -7.18481200  | -7.07722000 L  |
| C | -1 | 11.09023400 | -6.61642800  | -6.82567400 L  |
| N | -1 | 14.42278100 | -8.22010100  | -6.26502600 L  |
| C | -1 | 15.50495100 | -7.99845400  | -5.33780200 L  |
| C | -1 | 14.62800100 | -9.00523400  | -7.45590400 L  |
| C | -1 | 14.03052500 | -8.63043800  | -8.67266600 L  |
| C | -1 | 14.30522800 | -9.35904100  | -9.83743300 L  |
| C | -1 | 15.11730000 | -10.49330100 | -9.78688300 L  |
| C | -1 | 15.66672800 | -10.90372500 | -8.57280200 L  |
| C | -1 | 15.43186700 | -10.16164800 | -7.41413200 L  |
| C | -1 | 16.82978000 | -7.89145000  | -5.80575100 L  |
| C | -1 | 17.89013300 | -7.75541000  | -4.91037600 L  |
| C | -1 | 17.64126900 | -7.66536700  | -3.54221500 L  |
| C | -1 | 16.32964700 | -7.70815800  | -3.07097700 L  |
| C | -1 | 15.26171800 | -7.88250100  | -3.95778300 L  |
| S | -1 | 12.90834100 | -7.21787400  | -8.79841600 L  |
| S | -1 | 13.60834400 | -7.99680900  | -3.24927300 L  |
| H | -1 | 8.47377800  | -6.18638200  | -7.29644600 L  |
| H | -1 | 9.50709900  | -5.57329500  | -3.14531800 L  |
| H | -1 | 5.73478400  | -5.17213400  | 0.02550100 L   |
| H | -1 | 3.31022900  | -5.45865300  | 0.32989100 L   |
| H | -1 | 1.78222200  | -5.25746800  | -1.58503100 L  |
| H | -1 | 2.65487200  | -4.79281600  | -3.83593500 L  |
| H | -1 | 3.35519700  | -2.47820900  | -4.39827300 L  |
| H | -1 | 2.12416600  | -1.50283500  | -6.28840900 L  |
| H | -1 | 2.61834100  | -2.21673700  | -8.60615900 L  |
| H | -1 | 4.40697400  | -3.84800700  | -9.04574200 L  |
| H | -1 | 10.97537500 | -7.08697600  | -3.45901800 L  |
| H | -1 | 10.55533500 | -6.22516900  | -7.67376300 L  |
| H | -1 | 13.87219500 | -9.05749600  | -10.78235500 L |
| H | -1 | 15.31692000 | -11.05683300 | -10.68758800 L |

|   |    |              |              |             |   |
|---|----|--------------|--------------|-------------|---|
| H | -1 | 16.28028600  | -11.79387800 | -8.52989800 | L |
| H | -1 | 15.87715400  | -10.48818600 | -6.48208800 | L |
| H | -1 | 17.04487700  | -7.92818900  | -6.86571000 | L |
| H | -1 | 18.90486100  | -7.72698000  | -5.28037800 | L |
| H | -1 | 18.46300000  | -7.55500700  | -2.84814800 | L |
| H | -1 | 16.13939700  | -7.60412400  | -2.01142900 | L |
| C | -1 | -9.14405300  | -5.02585900  | -0.77133600 | L |
| C | -1 | -10.24711100 | -5.26298200  | -1.59740600 | L |
| C | -1 | -11.50301400 | -5.53046300  | -1.03445100 | L |
| C | -1 | -11.64839500 | -5.52421600  | 0.36533000  | L |
| C | -1 | -10.55446600 | -5.17474200  | 1.18381700  | L |
| C | -1 | -9.28400900  | -4.94121500  | 0.62537100  | L |
| C | -1 | -10.11820000 | -5.19335300  | -3.06139100 | L |
| C | -1 | -13.98142600 | -6.50976900  | 0.06379100  | L |
| C | -1 | -12.58789100 | -5.36477600  | -3.27507200 | L |
| N | -1 | -12.63405600 | -5.82188500  | -1.89297300 | L |
| C | -1 | -13.76134100 | -6.54244300  | -1.33019100 | L |
| C | -1 | -11.33840500 | -5.10982700  | -3.87830900 | L |
| C | -1 | -12.93665600 | -5.94851800  | 0.94698000  | L |
| C | -1 | -15.14500300 | -7.08738400  | 0.59881400  | L |
| C | -1 | -16.03859600 | -7.76984400  | -0.22693200 | L |
| C | -1 | -15.75327400 | -7.92555800  | -1.58180100 | L |
| C | -1 | -14.61434400 | -7.33264500  | -2.12908300 | L |
| C | -1 | -13.75736500 | -5.11140800  | -4.02374400 | L |
| C | -1 | -13.67203300 | -4.77433300  | -5.37764900 | L |
| C | -1 | -12.43206500 | -4.58318200  | -5.97742500 | L |
| C | -1 | -11.27099000 | -4.72526800  | -5.22606000 | L |
| O | -1 | -9.01799700  | -5.14586400  | -3.58450000 | L |
| O | -1 | -13.10084600 | -5.92377900  | 2.15465700  | L |
| C | -1 | -8.08014900  | -4.67278000  | 1.47312900  | L |
| C | -1 | -7.91900300  | -5.26001900  | 2.73913000  | L |
| C | -1 | -6.70155200  | -5.16907800  | 3.42959400  | L |
| C | -1 | -5.60343600  | -4.51018100  | 2.84193100  | L |
| C | -1 | -5.77735100  | -3.88657300  | 1.59475100  | L |
| C | -1 | -7.01834100  | -3.91529100  | 0.95979900  | L |
| N | -1 | -4.32584100  | -4.47511200  | 3.50259300  | L |
| C | -1 | -4.27089300  | -4.40191600  | 4.94240200  | L |
| C | -1 | -3.11072700  | -4.51827600  | 2.72045900  | L |
| C | -1 | -3.04283000  | -3.89774200  | 1.46033700  | L |
| C | -1 | -1.84514800  | -3.90237600  | 0.73947300  | L |
| C | -1 | -0.73116400  | -4.58951300  | 1.21971000  | L |
| C | -1 | -0.79304300  | -5.23405600  | 2.45214900  | L |
| C | -1 | -1.96565500  | -5.18324300  | 3.20805700  | L |
| C | -1 | -3.26500300  | -3.64427100  | 5.57726900  | L |
| C | -1 | -3.17428600  | -3.60782300  | 6.96888800  | L |
| C | -1 | -4.07594100  | -4.33528300  | 7.74283400  | L |

|   |    |              |             |               |
|---|----|--------------|-------------|---------------|
| C | -1 | -5.09548400  | -5.06429500 | 7.13054000 L  |
| C | -1 | -5.21573100  | -5.08101800 | 5.73509700 L  |
| S | -1 | -4.44450600  | -3.04947000 | 0.71468600 L  |
| S | -1 | -6.58533500  | -6.02255100 | 5.02278600 L  |
| H | -1 | -8.17407000  | -4.90235100 | -1.23023000 L |
| H | -1 | -10.68771900 | -5.12421800 | 2.25541100 L  |
| H | -1 | -15.35085200 | -7.03101900 | 1.65724100 L  |
| H | -1 | -16.93551800 | -8.20841200 | 0.18945000 L  |
| H | -1 | -16.41841700 | -8.50271100 | -2.21114500 L |
| H | -1 | -14.40796100 | -7.49362600 | -3.17720600 L |
| H | -1 | -14.73806400 | -5.17600900 | -3.57432300 L |
| H | -1 | -14.56589900 | -4.66610000 | -5.96958900 L |
| H | -1 | -12.36884900 | -4.32216500 | -7.02447900 L |
| H | -1 | -10.32119300 | -4.54331100 | -5.70057300 L |
| H | -1 | -8.72221900  | -5.82051700 | 3.18947400 L  |
| H | -1 | -7.12685100  | -3.38847700 | 0.02174700 L  |
| H | -1 | -1.78633500  | -3.38412500 | -0.20822800 L |
| H | -1 | 0.18053100   | -4.61999700 | 0.63697400 L  |
| H | -1 | 0.07037000   | -5.76812200 | 2.82447400 L  |
| H | -1 | -1.97505100  | -5.66368800 | 4.17558400 L  |
| H | -1 | -2.55192200  | -3.07659200 | 4.99369300 L  |
| H | -1 | -2.39952000  | -3.02201700 | 7.44690500 L  |
| H | -1 | -3.98560200  | -4.33325600 | 8.81743000 L  |
| H | -1 | -5.79697300  | -5.61498900 | 7.74504400 L  |
| C | -1 | -18.41049000 | 1.31661900  | 9.58397300 L  |
| C | -1 | -17.84221700 | 0.92482700  | 10.80969100 L |
| C | -1 | -17.15263500 | 1.86226200  | 11.60013400 L |
| C | -1 | -17.04172600 | 3.19356600  | 11.15771100 L |
| C | -1 | -17.67135100 | 3.58927700  | 9.96432800 L  |
| C | -1 | -18.34510600 | 2.65488400  | 9.15053100 L  |
| C | -1 | -17.98134200 | -0.45897600 | 11.30603700 L |
| C | -1 | -15.42653400 | 3.64734200  | 13.07875200 L |
| C | -1 | -17.07065300 | 0.25400000  | 13.50651600 L |
| N | -1 | -16.56581300 | 1.45790700  | 12.86274900 L |
| C | -1 | -15.52774200 | 2.28906400  | 13.44839000 L |
| C | -1 | -17.68493800 | -0.74614000 | 12.72294500 L |
| C | -1 | -16.23153000 | 4.14743800  | 11.94495100 L |
| C | -1 | -14.53381300 | 4.49184800  | 13.76328000 L |
| C | -1 | -13.70266500 | 3.97868300  | 14.75975000 L |
| C | -1 | -13.70038900 | 2.61163500  | 15.02704500 L |
| C | -1 | -14.58346500 | 1.76607300  | 14.35377300 L |
| C | -1 | -17.04563300 | 0.09004200  | 14.90818200 L |
| C | -1 | -17.49398300 | -1.09493100 | 15.49396300 L |
| C | -1 | -17.99661600 | -2.12382500 | 14.70011200 L |
| C | -1 | -18.10895600 | -1.94766200 | 13.32012400 L |
| O | -1 | -18.39824900 | -1.33796700 | 10.57223800 L |

|   |    |              |             |               |
|---|----|--------------|-------------|---------------|
| O | -1 | -16.18481300 | 5.32555400  | 11.62859900 L |
| C | -1 | -18.95317700 | 3.07541900  | 7.84500100 L  |
| C | -1 | -18.38900300 | 4.13058900  | 7.10573300 L  |
| C | -1 | -18.97897300 | 4.58484600  | 5.92244000 L  |
| C | -1 | -20.10446800 | 3.92920900  | 5.40404800 L  |
| C | -1 | -20.62211900 | 2.80770600  | 6.07403500 L  |
| C | -1 | -20.08452200 | 2.42375800  | 7.31241300 L  |
| N | -1 | -20.70241400 | 4.38241100  | 4.18361200 L  |
| C | -1 | -20.73764300 | 5.79016200  | 3.88524300 L  |
| C | -1 | -21.11410600 | 3.40904800  | 3.20965800 L  |
| C | -1 | -21.70048400 | 2.19840000  | 3.62110200 L  |
| C | -1 | -22.08045700 | 1.24959500  | 2.66085700 L  |
| C | -1 | -21.83173800 | 1.47807700  | 1.30443600 L  |
| C | -1 | -21.21271200 | 2.66083300  | 0.89733600 L  |
| C | -1 | -20.86264000 | 3.62559300  | 1.84168100 L  |
| C | -1 | -21.86661400 | 6.36475500  | 3.27447700 L  |
| C | -1 | -21.87084900 | 7.72363900  | 2.94181500 L  |
| C | -1 | -20.73862100 | 8.50159100  | 3.16640300 L  |
| C | -1 | -19.61774100 | 7.94044900  | 3.77244000 L  |
| C | -1 | -19.63252900 | 6.60264200  | 4.17809700 L  |
| S | -1 | -21.97879400 | 1.81939800  | 5.37632900 L  |
| S | -1 | -18.19741800 | 5.97670800  | 5.06393700 L  |
| H | -1 | -18.90306700 | 0.57200700  | 8.97215900 L  |
| H | -1 | -17.62983600 | 4.63090900  | 9.67273700 L  |
| H | -1 | -14.47369100 | 5.54589600  | 13.52438200 L |
| H | -1 | -13.03039400 | 4.63469900  | 15.29723200 L |
| H | -1 | -13.01385500 | 2.20749600  | 15.75845900 L |
| H | -1 | -14.53587600 | 0.70564900  | 14.55101500 L |
| H | -1 | -16.69682000 | 0.87895800  | 15.55899800 L |
| H | -1 | -17.46326400 | -1.20970500 | 16.56774500 L |
| H | -1 | -18.34046900 | -3.04097000 | 15.16072800 L |
| H | -1 | -18.56605400 | -2.73025400 | 12.72752000 L |
| H | -1 | -17.48563900 | 4.61387900  | 7.44641900 L  |
| H | -1 | -20.55197500 | 1.60728200  | 7.84656600 L  |
| H | -1 | -22.53640100 | 0.31661400  | 2.96720100 L  |
| H | -1 | -22.10379100 | 0.73085200  | 0.57047600 L  |
| H | -1 | -20.99191100 | 2.82814700  | -0.14841000 L |
| H | -1 | -20.36065300 | 4.52603500  | 1.51006400 L  |
| H | -1 | -22.74291300 | 5.76293500  | 3.07088800 L  |
| H | -1 | -22.74547300 | 8.18397500  | 2.51007300 L  |
| H | -1 | -20.73745100 | 9.54212300  | 2.88618200 L  |
| H | -1 | -18.74293300 | 8.55295200  | 3.94679300 L  |
| C | -1 | -19.97750800 | -5.77989900 | 2.30752900 L  |
| C | -1 | -19.94938100 | -6.47951500 | 3.52617200 L  |
| C | -1 | -19.98655400 | -5.76955100 | 4.73676200 L  |
| C | -1 | -20.17587600 | -4.37915600 | 4.72409300 L  |

|   |    |              |              |               |
|---|----|--------------|--------------|---------------|
| C | -1 | -20.28458800 | -3.69877300  | 3.50448700 L  |
| C | -1 | -20.08011600 | -4.37501200  | 2.28394800 L  |
| C | -1 | -19.79039000 | -7.94750700  | 3.56538700 L  |
| C | -1 | -19.28739000 | -4.27871800  | 7.08760200 L  |
| C | -1 | -19.87171000 | -7.88294200  | 6.05365500 L  |
| N | -1 | -19.71569600 | -6.44606500  | 5.98664800 L  |
| C | -1 | -19.09850600 | -5.67643800  | 7.05157300 L  |
| C | -1 | -19.79466100 | -8.64518100  | 4.87130500 L  |
| C | -1 | -20.05288900 | -3.64510900  | 5.99731600 L  |
| C | -1 | -18.62933600 | -3.50454300  | 8.05734100 L  |
| C | -1 | -17.78981200 | -4.11590300  | 8.99241500 L  |
| C | -1 | -17.58297000 | -5.49300900  | 8.94988600 L  |
| C | -1 | -18.20555300 | -6.26558800  | 7.97030500 L  |
| C | -1 | -20.14114300 | -8.53556100  | 7.27312100 L  |
| C | -1 | -20.17409200 | -9.92993600  | 7.33557800 L  |
| C | -1 | -19.97420100 | -10.68557100 | 6.17992900 L  |
| C | -1 | -19.79755700 | -10.04821900 | 4.95015000 L  |
| O | -1 | -19.72075100 | -8.58248100  | 2.52698600 L  |
| O | -1 | -20.51577700 | -2.52350300  | 6.12423200 L  |
| C | -1 | -19.78586300 | -3.60840200  | 1.03093400 L  |
| C | -1 | -19.17420400 | -2.34760200  | 1.10905800 L  |
| C | -1 | -18.78237600 | -1.65356400  | -0.03454400 L |
| C | -1 | -18.92712400 | -2.24282000  | -1.30385800 L |
| C | -1 | -19.57719300 | -3.48988400  | -1.40275500 L |
| C | -1 | -20.00390300 | -4.15582800  | -0.24520900 L |
| N | -1 | -18.37369500 | -1.61137200  | -2.47186800 L |
| C | -1 | -18.32341100 | -0.16817400  | -2.56959800 L |
| C | -1 | -17.88864500 | -2.42977500  | -3.56208000 L |
| C | -1 | -18.59008700 | -3.58143900  | -3.96273200 L |
| C | -1 | -18.24097100 | -4.23339400  | -5.15409500 L |
| C | -1 | -17.16975600 | -3.77737400  | -5.92261000 L |
| C | -1 | -16.41831600 | -2.68552100  | -5.48937700 L |
| C | -1 | -16.75387900 | -2.03408100  | -4.30199400 L |
| C | -1 | -18.37595800 | 0.45673500   | -3.83179000 L |
| C | -1 | -18.20313800 | 1.83054100   | -3.95701600 L |
| C | -1 | -18.07541500 | 2.62290900   | -2.82141800 L |
| C | -1 | -18.07235400 | 2.03269200   | -1.55992100 L |
| C | -1 | -18.18195200 | 0.64257900   | -1.42579600 L |
| S | -1 | -19.95511800 | -4.26601400  | -2.99766500 L |
| S | -1 | -18.04863600 | -0.02518900  | 0.24039900 L  |
| H | -1 | -19.83106400 | -6.33107300  | 1.38983200 L  |
| H | -1 | -20.42472800 | -2.62625600  | 3.52052500 L  |
| H | -1 | -18.73903500 | -2.42756900  | 8.06915000 L  |
| H | -1 | -17.27182400 | -3.52144600  | 9.73231300 L  |
| H | -1 | -16.91667200 | -5.96221900  | 9.66046300 L  |
| H | -1 | -17.95034500 | -7.31413100  | 7.91326300 L  |



|   |    |              |              |               |
|---|----|--------------|--------------|---------------|
| H | -1 | -20.31329800 | -7.96709800  | 8.17851600 L  |
| H | -1 | -20.34650800 | -10.42477100 | 8.28278300 L  |
| H | -1 | -19.99290000 | -11.76679500 | 6.23112600 L  |
| H | -1 | -19.69608900 | -10.65010000 | 4.05958900 L  |
| H | -1 | -18.94672400 | -1.90261100  | 2.06665800 L  |
| H | -1 | -20.49779800 | -5.11090000  | -0.35432700 L |
| H | -1 | -18.80016700 | -5.09867500  | -5.48674200 L |
| H | -1 | -16.90942300 | -4.28273300  | -6.84424900 L |
| H | -1 | -15.57969400 | -2.33733300  | -6.07906900 L |
| H | -1 | -16.16044700 | -1.18368200  | -3.98834100 L |
| H | -1 | -18.51583000 | -0.12309600  | -4.73045100 L |
| H | -1 | -18.17583300 | 2.27767500   | -4.93994600 L |
| H | -1 | -17.96614600 | 3.69063400   | -2.92220900 L |
| H | -1 | -17.95727600 | 2.65714700   | -0.68294100 L |
| C | -1 | 9.27474500   | 12.09054900  | 5.57543700 L  |
| C | -1 | 8.92768300   | 13.37424600  | 6.02169000 L  |
| C | -1 | 8.80535600   | 14.42248300  | 5.09741900 L  |
| C | -1 | 8.99496000   | 14.17906200  | 3.72886200 L  |
| C | -1 | 9.24599000   | 12.87399200  | 3.28063300 L  |
| C | -1 | 9.40746100   | 11.81365400  | 4.19716900 L  |
| C | -1 | 8.63041000   | 13.64892900  | 7.44427700 L  |
| C | -1 | 9.12723900   | 16.68704500  | 3.36357100 L  |
| C | -1 | 7.76905500   | 15.89294800  | 6.80618000 L  |
| N | -1 | 8.48534900   | 15.75386100  | 5.55527500 L  |
| C | -1 | 8.90342400   | 16.87869100  | 4.74330000 L  |
| C | -1 | 7.88623700   | 14.88063500  | 7.78335800 L  |
| C | -1 | 8.98075900   | 15.32877300  | 2.80139600 L  |
| C | -1 | 9.56033300   | 17.76062600  | 2.56890600 L  |
| C | -1 | 9.78182500   | 19.01476600  | 3.13994000 L  |
| C | -1 | 9.60631300   | 19.19817600  | 4.51188900 L  |
| C | -1 | 9.18875800   | 18.13347200  | 5.31393400 L  |
| C | -1 | 6.86599900   | 16.95116400  | 7.02165900 L  |
| C | -1 | 6.14488600   | 17.03129100  | 8.21381400 L  |
| C | -1 | 6.33194200   | 16.07645900  | 9.21212700 L  |
| C | -1 | 7.19797400   | 15.00146900  | 9.00173800 L  |
| O | -1 | 8.93805900   | 12.84820000  | 8.31220000 L  |
| O | -1 | 8.89475700   | 15.15895100  | 1.59612400 L  |
| C | -1 | 9.70753600   | 10.42535500  | 3.72206800 L  |
| C | -1 | 10.37727500  | 10.19696100  | 2.51047800 L  |
| C | -1 | 10.63307100  | 8.89860400   | 2.05377000 L  |
| C | -1 | 10.32004600  | 7.78403700   | 2.85745800 L  |
| C | -1 | 9.64448100   | 8.01173500   | 4.07468000 L  |
| C | -1 | 9.31418400   | 9.30902400   | 4.47296600 L  |
| N | -1 | 10.70476900  | 6.44778300   | 2.46711600 L  |
| C | -1 | 10.81461900  | 6.08186000   | 1.06556500 L  |
| C | -1 | 11.00980000  | 5.46973500   | 3.49387500 L  |

|   |    |              |             |               |
|---|----|--------------|-------------|---------------|
| C | -1 | 10.29884000  | 5.43519900  | 4.70741700 L  |
| C | -1 | 10.49858500  | 4.38514000  | 5.61281400 L  |
| C | -1 | 11.43721900  | 3.39092200  | 5.34712100 L  |
| C | -1 | 12.19975500  | 3.45524300  | 4.18593900 L  |
| C | -1 | 12.00208700  | 4.49366000  | 3.27687700 L  |
| C | -1 | 10.61037100  | 4.74234900  | 0.65731000 L  |
| C | -1 | 10.82912900  | 4.34877100  | -0.66346400 L |
| C | -1 | 11.20703600  | 5.28962100  | -1.61553400 L |
| C | -1 | 11.35830400  | 6.62435000  | -1.24775100 L |
| C | -1 | 11.15269200  | 7.02940200  | 0.07873600 L  |
| S | -1 | 9.10308500   | 6.68881300  | 5.17283800 L  |
| S | -1 | 11.37297600  | 8.78044600  | 0.41652900 L  |
| H | -1 | 9.42731800   | 11.31195800 | 6.31008200 L  |
| H | -1 | 9.32751900   | 12.70006100 | 2.21700700 L  |
| H | -1 | 9.74333900   | 17.62512700 | 1.51439200 L  |
| H | -1 | 10.10768500  | 19.84019900 | 2.52038900 L  |
| H | -1 | 9.80951100   | 20.16302300 | 4.95773900 L  |
| H | -1 | 9.11356800   | 18.28479300 | 6.38106200 L  |
| H | -1 | 6.69018500   | 17.69589400 | 6.25760500 L  |
| H | -1 | 5.42809700   | 17.82828300 | 8.35823400 L  |
| H | -1 | 5.76554000   | 16.14401600 | 10.13051900 L |
| H | -1 | 7.28274900   | 14.23655300 | 9.76315600 L  |
| H | -1 | 10.71065700  | 11.02700600 | 1.90275700 L  |
| H | -1 | 8.75085300   | 9.43306900  | 5.38689400 L  |
| H | -1 | 9.92402700   | 4.34009200  | 6.52896400 L  |
| H | -1 | 11.57961400  | 2.57621000  | 6.04451000 L  |
| H | -1 | 12.94235600  | 2.69915800  | 3.98692900 L  |
| H | -1 | 12.61247200  | 4.52675100  | 2.38831700 L  |
| H | -1 | 10.28270900  | 3.99010200  | 1.36198000 L  |
| H | -1 | 10.69676400  | 3.31323000  | -0.94879700 L |
| H | -1 | 11.37052300  | 4.98790600  | -2.64175400 L |
| H | -1 | 11.63910600  | 7.35010200  | -2.00119200 L |
| C | -1 | -9.63917900  | 13.00128300 | -1.77077300 L |
| C | -1 | -9.87206000  | 14.17087800 | -2.51534000 L |
| C | -1 | -10.72398200 | 15.16421800 | -1.99848700 L |
| C | -1 | -11.22551700 | 15.03481700 | -0.68715100 L |
| C | -1 | -10.99482200 | 13.85547100 | 0.04230800 L  |
| C | -1 | -10.25896000 | 12.80961900 | -0.52728200 L |
| C | -1 | -9.30106300  | 14.34331600 | -3.86835000 L |
| C | -1 | -12.79537400 | 16.97399000 | -1.12413000 L |
| C | -1 | -10.41034300 | 16.56917000 | -4.04648100 L |
| N | -1 | -11.15290000 | 16.26944100 | -2.83362500 L |
| C | -1 | -12.38529500 | 16.95471700 | -2.47479400 L |
| C | -1 | -9.58318200  | 15.58114700 | -4.62406600 L |
| C | -1 | -12.10986500 | 16.09053900 | -0.16327700 L |
| C | -1 | -13.93580400 | 17.69958300 | -0.74511600 L |

|   |    |              |             |               |
|---|----|--------------|-------------|---------------|
| C | -1 | -14.73309600 | 18.30434600 | -1.71528600 L |
| C | -1 | -14.40668000 | 18.18644400 | -3.06527400 L |
| C | -1 | -13.24524600 | 17.51056000 | -3.44764700 L |
| C | -1 | -10.46890700 | 17.84035900 | -4.65515700 L |
| C | -1 | -9.87984000  | 18.05763100 | -5.90229400 L |
| C | -1 | -9.18958100  | 17.02686500 | -6.53624100 L |
| C | -1 | -9.00634100  | 15.80489500 | -5.88819500 L |
| O | -1 | -8.56649300  | 13.49035800 | -4.33991800 L |
| O | -1 | -12.32044300 | 16.18654100 | 1.03461000 L  |
| C | -1 | -10.36687400 | 11.44257300 | 0.02243000 L  |
| C | -1 | -9.78998100  | 11.07517900 | 1.24322200 L  |
| C | -1 | -9.94602700  | 9.76642600  | 1.73361100 L  |
| C | -1 | -10.63525600 | 8.79926000  | 0.96772800 L  |
| C | -1 | -11.19830500 | 9.17765600  | -0.26178200 L |
| C | -1 | -11.10460800 | 10.49748000 | -0.69290700 L |
| N | -1 | -10.81215400 | 7.46097600  | 1.45997600 L  |
| C | -1 | -11.04434500 | 7.26386500  | 2.86806300 L  |
| C | -1 | -10.85041700 | 6.34425800  | 0.54169000 L  |
| C | -1 | -11.38140200 | 6.49180800  | -0.75294400 L |
| C | -1 | -11.43042500 | 5.39402100  | -1.62171800 L |
| C | -1 | -11.01235900 | 4.13431400  | -1.19512400 L |
| C | -1 | -10.50452200 | 3.97087000  | 0.09179100 L  |
| C | -1 | -10.38797000 | 5.07382400  | 0.94211100 L  |
| C | -1 | -11.95664900 | 6.28329800  | 3.30734100 L  |
| C | -1 | -12.13316500 | 6.03928300  | 4.66779100 L  |
| C | -1 | -11.43880700 | 6.79965400  | 5.60660300 L  |
| C | -1 | -10.56927300 | 7.80673600  | 5.18591900 L  |
| C | -1 | -10.37277800 | 8.05150700  | 3.82177000 L  |
| S | -1 | -12.11171300 | 8.03835000  | -1.32543000 L |
| S | -1 | -9.23325800  | 9.38027900  | 3.35398100 L  |
| H | -1 | -9.04677000  | 12.19884700 | -2.19363400 L |
| H | -1 | -11.48255600 | 13.70539200 | 0.99825200 L  |
| H | -1 | -14.25258900 | 17.73472500 | 0.28993600 L  |
| H | -1 | -15.63514300 | 18.81435500 | -1.42088400 L |
| H | -1 | -15.06297900 | 18.60700900 | -3.81704000 L |
| H | -1 | -13.04231700 | 17.39949300 | -4.50401500 L |
| H | -1 | -10.98260800 | 18.66326700 | -4.17753800 L |
| H | -1 | -9.96958600  | 19.02281200 | -6.38470000 L |
| H | -1 | -8.77644100  | 17.18519300 | -7.52026600 L |
| H | -1 | -8.41134800  | 15.04014400 | -6.37282700 L |
| H | -1 | -9.25425800  | 11.81178200 | 1.82923200 L  |
| H | -1 | -11.61769600 | 10.79073200 | -1.59574500 L |
| H | -1 | -11.80778500 | 5.51420900  | -2.62879800 L |
| H | -1 | -11.08442600 | 3.28561200  | -1.86211100 L |
| H | -1 | -10.18516000 | 2.99182000  | 0.42607700 L  |
| H | -1 | -9.95387400  | 4.93138200  | 1.92342600 L  |

|   |    |              |              |               |
|---|----|--------------|--------------|---------------|
| H | -1 | -12.52716500 | 5.69991000   | 2.59579300 L  |
| H | -1 | -12.81047400 | 5.26082900   | 4.99178900 L  |
| H | -1 | -11.58372800 | 6.61668300   | 6.66043400 L  |
| H | -1 | -10.05536900 | 8.40831500   | 5.92237000 L  |
| C | -1 | 5.20534900   | -11.96364200 | 1.77818000 L  |
| C | -1 | 4.57535300   | -11.27016800 | 0.72295400 L  |
| C | -1 | 3.20102200   | -11.46613400 | 0.47562500 L  |
| C | -1 | 2.44779700   | -12.25928200 | 1.36066500 L  |
| C | -1 | 3.08190900   | -12.93563800 | 2.40939600 L  |
| C | -1 | 4.46860100   | -12.83872000 | 2.59004500 L  |
| C | -1 | 5.33255600   | -10.34984100 | -0.14658100 L |
| C | -1 | 0.47952900   | -12.13894800 | -0.22763700 L |
| C | -1 | 3.25465400   | -9.84286500  | -1.43192400 L |
| N | -1 | 2.57254900   | -10.90213400 | -0.70451100 L |
| C | -1 | 1.32257600   | -11.49554800 | -1.15920400 L |
| C | -1 | 4.63739200   | -9.63204400  | -1.23391300 L |
| C | -1 | 1.00942300   | -12.44587300 | 1.11123600 L  |
| C | -1 | -0.77335900  | -12.63016300 | -0.63045800 L |
| C | -1 | -1.14196200  | -12.58938900 | -1.97426200 L |
| C | -1 | -0.24937800  | -12.09332800 | -2.92416000 L |
| C | -1 | 0.97823700   | -11.56096700 | -2.52556100 L |
| C | -1 | 2.56836700   | -8.99596300  | -2.32731500 L |
| C | -1 | 3.27235100   | -8.12728200  | -3.16130900 L |
| C | -1 | 4.65788000   | -8.02503700  | -3.05537500 L |
| C | -1 | 5.33349300   | -8.73210200  | -2.06208000 L |
| O | -1 | 6.51638600   | -10.14596100 | 0.06049900 L  |
| O | -1 | 0.29209900   | -12.93498000 | 1.96793400 L  |
| C | -1 | 5.12281700   | -13.69404200 | 3.60868400 L  |
| C | -1 | 4.80306800   | -15.05619600 | 3.66756800 L  |
| C | -1 | 5.18896400   | -15.83260200 | 4.75838100 L  |
| C | -1 | 5.97399900   | -15.26990800 | 5.78037000 L  |
| C | -1 | 6.38515100   | -13.92663300 | 5.68150500 L  |
| C | -1 | 5.95576700   | -13.14759500 | 4.59400800 L  |
| N | -1 | 6.27615400   | -16.04213800 | 6.94897800 L  |
| C | -1 | 5.25268900   | -16.89841500 | 7.49290200 L  |
| C | -1 | 7.52347000   | -15.85368000 | 7.63708800 L  |
| C | -1 | 8.06314900   | -14.56649200 | 7.79355600 L  |
| C | -1 | 9.19380900   | -14.38467000 | 8.60135700 L  |
| C | -1 | 9.84535900   | -15.48280900 | 9.16731700 L  |
| C | -1 | 9.35022500   | -16.77053400 | 8.95852900 L  |
| C | -1 | 8.18864300   | -16.95627600 | 8.20579700 L  |
| C | -1 | 5.05772200   | -16.98644700 | 8.88497800 L  |
| C | -1 | 4.01954800   | -17.76119900 | 9.40616600 L  |
| C | -1 | 3.16140500   | -18.44614200 | 8.54611900 L  |
| C | -1 | 3.35794500   | -18.38248000 | 7.16560100 L  |
| C | -1 | 4.39108900   | -17.60402000 | 6.63419800 L  |

|   |    |              |              |               |
|---|----|--------------|--------------|---------------|
| S | -1 | 7.33373100   | -13.10895300 | 6.99902800 L  |
| S | -1 | 4.58254300   | -17.53821900 | 4.83734500 L  |
| H | -1 | 6.27100300   | -11.86033800 | 1.94170900 L  |
| H | -1 | 2.50122800   | -13.57212400 | 3.06713900 L  |
| H | -1 | -1.43367500  | -13.10815400 | 0.08083100 L  |
| H | -1 | -2.09562700  | -12.99525000 | -2.28498300 L |
| H | -1 | -0.50063800  | -12.13227100 | -3.97399500 L |
| H | -1 | 1.66675800   | -11.23237300 | -3.29155700 L |
| H | -1 | 1.49059400   | -9.02087900  | -2.40686100 L |
| H | -1 | 2.74034500   | -7.53510900  | -3.89316700 L |
| H | -1 | 5.20456700   | -7.37147600  | -3.72127600 L |
| H | -1 | 6.40004400   | -8.58446800  | -1.95004900 L |
| H | -1 | 4.19611400   | -15.50243200 | 2.89061500 L  |
| H | -1 | 6.22367300   | -12.10337300 | 4.54144400 L  |
| H | -1 | 9.57926600   | -13.38988300 | 8.78113600 L  |
| H | -1 | 10.73750600  | -15.33343700 | 9.76102200 L  |
| H | -1 | 9.85797700   | -17.62363100 | 9.39018800 L  |
| H | -1 | 7.80310400   | -17.95880000 | 8.06655500 L  |
| H | -1 | 5.68786800   | -16.42941900 | 9.56645800 L  |
| H | -1 | 3.87530300   | -17.82366000 | 10.47718300 L |
| H | -1 | 2.34590500   | -19.03100200 | 8.94960500 L  |
| H | -1 | 2.69309000   | -18.92327300 | 6.50577300 L  |
| C | -1 | -11.36208800 | -8.83461000  | -3.59849600 L |
| C | -1 | -11.02095200 | -8.28420700  | -4.83817100 L |
| C | -1 | -9.68844000  | -7.92073800  | -5.10334300 L |
| C | -1 | -8.69168000  | -8.20693600  | -4.14778800 L |
| C | -1 | -9.04530700  | -8.76902100  | -2.90813200 L |
| C | -1 | -10.38980400 | -9.04515800  | -2.61113500 L |
| C | -1 | -12.05723700 | -8.02714300  | -5.85190600 L |
| C | -1 | -7.06620600  | -6.76959000  | -5.45821300 L |
| C | -1 | -10.30921800 | -7.19181800  | -7.41403100 L |
| N | -1 | -9.36107500  | -7.17758800  | -6.30625000 L |
| C | -1 | -8.12588400  | -6.40399900  | -6.31858900 L |
| C | -1 | -11.65066000 | -7.57484800  | -7.18990600 L |
| C | -1 | -7.30565300  | -7.79061000  | -4.42235400 L |
| C | -1 | -5.84602000  | -6.07455100  | -5.50854400 L |
| C | -1 | -5.70272200  | -4.96272100  | -6.33655200 L |
| C | -1 | -6.78059900  | -4.52359800  | -7.10247900 L |
| C | -1 | -7.98843100  | -5.22370300  | -7.08041900 L |
| C | -1 | -9.91319600  | -6.90798100  | -8.73411400 L |
| C | -1 | -10.82871000 | -6.94029100  | -9.78483100 L |
| C | -1 | -12.15654600 | -7.27775800  | -9.54491700 L |
| C | -1 | -12.57075800 | -7.58514000  | -8.25194000 L |
| O | -1 | -13.23606000 | -8.21060900  | -5.59446400 L |
| O | -1 | -6.38213600  | -8.23295200  | -3.75922500 L |
| C | -1 | -10.81768900 | -9.44919900  | -1.24880400 L |

|   |    |              |              |                |
|---|----|--------------|--------------|----------------|
| C | -1 | -10.27447500 | -8.83575700  | -0.11432700 L  |
| C | -1 | -10.83482800 | -9.04374500  | 1.15298200 L   |
| C | -1 | -11.96421600 | -9.87110000  | 1.30112600 L   |
| C | -1 | -12.41668500 | -10.59050300 | 0.17720700 L   |
| C | -1 | -11.86407300 | -10.36099900 | -1.08001000 L  |
| N | -1 | -12.72880800 | -9.89552700  | 2.52479000 L   |
| C | -1 | -12.12257100 | -9.60404900  | 3.80699700 L   |
| C | -1 | -14.16751200 | -10.02913200 | 2.41592000 L   |
| C | -1 | -14.73583000 | -10.87676200 | 1.44508700 L   |
| C | -1 | -16.12150200 | -10.99124300 | 1.33462800 L   |
| C | -1 | -16.95735100 | -10.27946400 | 2.19019400 L   |
| C | -1 | -16.41338800 | -9.41877900  | 3.13981800 L   |
| C | -1 | -15.02973100 | -9.27425400  | 3.23959000 L   |
| C | -1 | -12.70261600 | -10.09906700 | 4.99759300 L   |
| C | -1 | -12.25745300 | -9.66002000  | 6.24749400 L   |
| C | -1 | -11.19283100 | -8.77001300  | 6.33230600 L   |
| C | -1 | -10.56200800 | -8.33498500  | 5.17188600 L   |
| C | -1 | -11.00273200 | -8.75858500  | 3.91405200 L   |
| S | -1 | -13.73055000 | -11.81727700 | 0.28835300 L   |
| S | -1 | -10.07031000 | -8.14149200  | 2.50677000 L   |
| H | -1 | -12.40141500 | -9.04419200  | -3.38162300 L  |
| H | -1 | -8.28295500  | -8.94103800  | -2.15758800 L  |
| H | -1 | -5.01205200  | -6.37885600  | -4.89317400 L  |
| H | -1 | -4.76426900  | -4.42380100  | -6.36118900 L  |
| H | -1 | -6.68541600  | -3.63109900  | -7.70706200 L  |
| H | -1 | -8.81970200  | -4.81681400  | -7.63810600 L  |
| H | -1 | -8.89268200  | -6.68165100  | -8.96553600 L  |
| H | -1 | -10.49954500 | -6.72031000  | -10.78840500 L |
| H | -1 | -12.86025000 | -7.32345200  | -10.36335600 L |
| H | -1 | -13.60133700 | -7.86058300  | -8.08509500 L  |
| H | -1 | -9.45781400  | -8.13207800  | -0.21924000 L  |
| H | -1 | -12.28107800 | -10.87479800 | -1.93658200 L  |
| H | -1 | -16.55246200 | -11.62054600 | 0.56652500 L   |
| H | -1 | -18.02590300 | -10.38462300 | 2.09953700 L   |
| H | -1 | -17.06290800 | -8.84954400  | 3.78669600 L   |
| H | -1 | -14.63594700 | -8.55920000  | 3.94954300 L   |
| H | -1 | -13.53080600 | -10.79488100 | 4.95963400 L   |
| H | -1 | -12.74255500 | -10.00135000 | 7.15203100 L   |
| H | -1 | -10.84312700 | -8.42752100  | 7.29507100 L   |
| H | -1 | -9.71251500  | -7.67128600  | 5.24972500 L   |
| C | -1 | 1.73268400   | 12.65025000  | -0.92566300 L  |
| C | -1 | 0.52908700   | 11.95949900  | -0.77291600 L  |
| C | -1 | -0.66605400  | 12.51776300  | -1.24571000 L  |
| C | -1 | -0.66497400  | 13.78896300  | -1.83461400 L  |
| C | -1 | 0.55251000   | 14.46451400  | -2.02315700 L  |
| C | -1 | 1.76355200   | 13.87829900  | -1.60424000 L  |

|   |    |             |             |               |
|---|----|-------------|-------------|---------------|
| C | -1 | 0.51148600  | 10.54893300 | -0.36583600 L |
| C | -1 | -3.20590400 | 13.66389300 | -1.92967700 L |
| C | -1 | -1.67430500 | 10.28366600 | -1.47910800 L |
| N | -1 | -1.85899600 | 11.70653300 | -1.28980300 L |
| C | -1 | -3.14211800 | 12.36208500 | -1.39360600 L |
| C | -1 | -0.49594400 | 9.68120000  | -0.98966300 L |
| C | -1 | -1.94598600 | 14.31822100 | -2.34251100 L |
| C | -1 | -4.44409000 | 14.32074200 | -2.02779500 L |
| C | -1 | -5.60751700 | 13.69347500 | -1.57206500 L |
| C | -1 | -5.54379300 | 12.41088800 | -1.02070100 L |
| C | -1 | -4.31655300 | 11.74903900 | -0.92262700 L |
| C | -1 | -2.51071300 | 9.54936100  | -2.33510600 L |
| C | -1 | -2.17634000 | 8.24388400  | -2.68847500 L |
| C | -1 | -1.03752800 | 7.63631400  | -2.15876900 L |
| C | -1 | -0.19543900 | 8.35052000  | -1.30782100 L |
| O | -1 | 1.33970000  | 10.10381800 | 0.40511200 L  |
| O | -1 | -1.96253700 | 15.25993700 | -3.11224900 L |
| C | -1 | 3.06109600  | 14.45185100 | -2.03328500 L |
| C | -1 | 3.26790400  | 15.83455700 | -2.03264300 L |
| C | -1 | 4.41483800  | 16.38185700 | -2.61370900 L |
| C | -1 | 5.40519700  | 15.54283500 | -3.16643300 L |
| C | -1 | 5.24817400  | 14.14908600 | -3.06553800 L |
| C | -1 | 4.07035000  | 13.61576300 | -2.53553000 L |
| N | -1 | 6.51691700  | 16.10587200 | -3.88468100 L |
| C | -1 | 6.30443200  | 17.31205700 | -4.65161700 L |
| C | -1 | 7.80824800  | 15.45371200 | -3.86946000 L |
| C | -1 | 7.92042100  | 14.05575700 | -3.74652100 L |
| C | -1 | 9.18580600  | 13.44957800 | -3.75277200 L |
| C | -1 | 10.34256500 | 14.22292100 | -3.85290300 L |
| C | -1 | 10.24279900 | 15.60630800 | -3.97500100 L |
| C | -1 | 8.98727900  | 16.21494800 | -3.98763100 L |
| C | -1 | 6.92363000  | 17.48103100 | -5.90537700 L |
| C | -1 | 6.72455700  | 18.64777600 | -6.64687700 L |
| C | -1 | 5.91008100  | 19.66000700 | -6.14460900 L |
| C | -1 | 5.30855900  | 19.51403600 | -4.89526200 L |
| C | -1 | 5.46674800  | 18.33275800 | -4.16581400 L |
| S | -1 | 6.48404100  | 12.96939000 | -3.65097500 L |
| S | -1 | 4.56115900  | 18.18146600 | -2.61271200 L |
| H | -1 | 2.65650300  | 12.17846400 | -0.62239000 L |
| H | -1 | 0.56392100  | 15.40289900 | -2.56487400 L |
| H | -1 | -4.50721500 | 15.32503200 | -2.42888200 L |
| H | -1 | -6.55794300 | 14.20785700 | -1.63228200 L |
| H | -1 | -6.44576000 | 11.93208000 | -0.66110800 L |
| H | -1 | -4.27991200 | 10.76642900 | -0.46935100 L |
| H | -1 | -3.37200800 | 10.00826600 | -2.80069000 L |
| H | -1 | -2.78652800 | 7.71771400  | -3.40196700 L |

|   |    |             |             |               |
|---|----|-------------|-------------|---------------|
| H | -1 | -0.79306100 | 6.61887500  | -2.42850700 L |
| H | -1 | 0.71839200  | 7.88892500  | -0.95535000 L |
| H | -1 | 2.51604100  | 16.49409100 | -1.61637800 L |
| H | -1 | 3.93185200  | 12.54088400 | -2.55087000 L |
| H | -1 | 9.27574300  | 12.37324800 | -3.67374400 L |
| H | -1 | 11.31483700 | 13.74909600 | -3.84080100 L |
| H | -1 | 11.13716500 | 16.20920500 | -4.06512700 L |
| H | -1 | 8.93311500  | 17.28542900 | -4.10185700 L |
| H | -1 | 7.56225800  | 16.70649900 | -6.30540400 L |
| H | -1 | 7.20412700  | 18.77022100 | -7.60890400 L |
| H | -1 | 5.74732700  | 20.55982400 | -6.72172100 L |
| H | -1 | 4.69988700  | 20.31280500 | -4.49789400 L |
| C | -1 | -4.07971700 | 1.98380700  | 10.47346300 L |
| C | -1 | -4.48803700 | 1.79002200  | 11.79745300 L |
| C | -1 | -3.71564900 | 0.99199200  | 12.65816200 L |
| C | -1 | -2.54133900 | 0.38511300  | 12.17614800 L |
| C | -1 | -2.11469400 | 0.62791500  | 10.86287200 L |
| C | -1 | -2.87226800 | 1.43631000  | 10.00559100 L |
| C | -1 | -5.70144100 | 2.44086700  | 12.32330600 L |
| C | -1 | -2.37084700 | -0.91542900 | 14.35298100 L |
| C | -1 | -5.04218400 | 1.75674200  | 14.62071300 L |
| N | -1 | -4.13721500 | 0.78626700  | 14.02604900 L |
| C | -1 | -3.60358900 | -0.35363900 | 14.74894300 L |
| C | -1 | -5.87268400 | 2.53542600  | 13.78236600 L |
| C | -1 | -1.79576400 | -0.53397300 | 13.05175300 L |
| C | -1 | -1.80061700 | -1.95701200 | 15.10288600 L |
| C | -1 | -2.53912500 | -2.57419100 | 16.10941600 L |
| C | -1 | -3.82631700 | -2.12610000 | 16.40427500 L |
| C | -1 | -4.34445700 | -1.00055700 | 15.75487000 L |
| C | -1 | -5.02233600 | 2.03938100  | 16.00185900 L |
| C | -1 | -5.85563800 | 3.02753600  | 16.53665300 L |
| C | -1 | -6.72086000 | 3.74086200  | 15.70639200 L |
| C | -1 | -6.74029800 | 3.49056900  | 14.33614300 L |
| O | -1 | -6.51379300 | 2.94971300  | 11.56769700 L |
| O | -1 | -0.77547500 | -1.06756400 | 12.65089100 L |
| C | -1 | -2.39337800 | 1.75276100  | 8.63853600 L  |
| C | -1 | -1.70610500 | 0.81157000  | 7.85654600 L  |
| C | -1 | -1.32685700 | 1.11427300  | 6.54131700 L  |
| C | -1 | -1.68673000 | 2.35290500  | 5.97363700 L  |
| C | -1 | -2.27160400 | 3.32910600  | 6.80239000 L  |
| C | -1 | -2.61596000 | 3.02691500  | 8.11306100 L  |
| N | -1 | -1.56286200 | 2.59492600  | 4.55863500 L  |
| C | -1 | -0.47754400 | 2.00054700  | 3.80320800 L  |
| C | -1 | -2.57883500 | 3.41652600  | 3.92658000 L  |
| C | -1 | -3.14884100 | 4.51213500  | 4.60870100 L  |
| C | -1 | -4.19269400 | 5.24427600  | 4.03541500 L  |



|   |    |             |             |                |
|---|----|-------------|-------------|----------------|
| C | -1 | -4.68171100 | 4.89636500  | 2.78233600 L   |
| C | -1 | -4.08508900 | 3.86262900  | 2.07240600 L   |
| C | -1 | -3.06163500 | 3.11070100  | 2.64386500 L   |
| C | -1 | -0.02654800 | 2.60003200  | 2.60736800 L   |
| C | -1 | 1.10957800  | 2.12861400  | 1.95058400 L   |
| C | -1 | 1.80555900  | 1.03971800  | 2.46274700 L   |
| C | -1 | 1.33124300  | 0.38022900  | 3.59322600 L   |
| C | -1 | 0.19523100  | 0.84832100  | 4.26686300 L   |
| S | -1 | -2.59053100 | 5.00788600  | 6.23718900 L   |
| S | -1 | -0.39197500 | -0.14819300 | 5.65348000 L   |
| H | -1 | -4.69681400 | 2.57936900  | 9.81294600 L   |
| H | -1 | -1.18438000 | 0.19809000  | 10.51603800 L  |
| H | -1 | -0.83325200 | -2.36635200 | 14.83758700 L  |
| H | -1 | -2.13664300 | -3.44477700 | 16.60841300 L  |
| H | -1 | -4.42342100 | -2.65283300 | 17.13669600 L  |
| H | -1 | -5.34246900 | -0.66764400 | 16.00400800 L  |
| H | -1 | -4.33035300 | 1.53512700  | 16.66214400 L  |
| H | -1 | -5.81702800 | 3.25798900  | 17.59357600 L  |
| H | -1 | -7.34366900 | 4.52436200  | 16.11534200 L  |
| H | -1 | -7.38625900 | 4.08734600  | 13.70285400 L  |
| H | -1 | -1.47983100 | -0.16896600 | 8.25719300 L   |
| H | -1 | -3.08566700 | 3.78707100  | 8.71755700 L   |
| H | -1 | -4.63721000 | 6.07496200  | 4.56908900 L   |
| H | -1 | -5.50892600 | 5.43993000  | 2.35125400 L   |
| H | -1 | -4.39108500 | 3.66585600  | 1.05902200 L   |
| H | -1 | -2.62946000 | 2.31230100  | 2.06759600 L   |
| H | -1 | -0.48810600 | 3.50055600  | 2.22917600 L   |
| H | -1 | 1.46966200  | 2.63232400  | 1.06297300 L   |
| H | -1 | 2.70610500  | 0.69771200  | 1.97562500 L   |
| H | -1 | 1.85567100  | -0.49657800 | 3.95173700 L   |
| C | -1 | 9.92334500  | 3.89845800  | -10.38408700 L |
| C | -1 | 8.92343900  | 4.14425000  | -9.43722700 L  |
| C | -1 | 8.68126800  | 3.20475700  | -8.42283300 L  |
| C | -1 | 9.50882000  | 2.07415300  | -8.30339400 L  |
| C | -1 | 10.55751500 | 1.87461600  | -9.21161400 L  |
| C | -1 | 10.73929600 | 2.75508100  | -10.29226300 L |
| C | -1 | 8.09252400  | 5.36187800  | -9.50137300 L  |
| C | -1 | 7.80561200  | 1.04463400  | -6.74040200 L  |
| C | -1 | 6.99013300  | 4.69718900  | -7.37037400 L  |
| N | -1 | 7.54848200  | 3.36845000  | -7.54138900 L  |
| C | -1 | 6.98135900  | 2.17476800  | -6.93964400 L  |
| C | -1 | 7.19803800  | 5.67294600  | -8.37080500 L  |
| C | -1 | 9.17382200  | 1.05745100  | -7.29031000 L  |
| C | -1 | 7.28384600  | -0.10979900 | -6.13655700 L  |
| C | -1 | 5.93685900  | -0.16552100 | -5.78396300 L  |
| C | -1 | 5.09329900  | 0.91004300  | -6.06361200 L  |

|   |    |             |             |                |
|---|----|-------------|-------------|----------------|
| C | -1 | 5.60665200  | 2.07114000  | -6.64784300 L  |
| C | -1 | 6.28116900  | 5.05783400  | -6.20898000 L  |
| C | -1 | 5.68871700  | 6.31662300  | -6.10383300 L  |
| C | -1 | 5.81168500  | 7.23647800  | -7.14366500 L  |
| C | -1 | 6.58032800  | 6.92913800  | -8.26453900 L  |
| O | -1 | 8.17138300  | 6.11869100  | -10.45586500 L |
| O | -1 | 9.98758700  | 0.20842600  | -6.96454000 L  |
| C | -1 | 11.65650900 | 2.41365100  | -11.41062400 L |
| C | -1 | 11.81621100 | 1.07777100  | -11.81822000 L |
| C | -1 | 12.45610700 | 0.76684300  | -13.02066200 L |
| C | -1 | 12.85541200 | 1.80349400  | -13.87952200 L |
| C | -1 | 12.75798200 | 3.13712700  | -13.44821600 L |
| C | -1 | 12.23141500 | 3.42817300  | -12.19149600 L |
| N | -1 | 13.23608600 | 1.52276600  | -15.22906000 L |
| C | -1 | 13.98133000 | 0.33615500  | -15.53939700 L |
| C | -1 | 12.71795000 | 2.37032200  | -16.27310800 L |
| C | -1 | 12.62290000 | 3.75770700  | -16.07020000 L |
| C | -1 | 12.06470900 | 4.57281000  | -17.06088500 L |
| C | -1 | 11.54531400 | 4.01049500  | -18.22746700 L |
| C | -1 | 11.62513300 | 2.63229700  | -18.43238600 L |
| C | -1 | 12.22217800 | 1.81598600  | -17.46861700 L |
| C | -1 | 14.94326600 | 0.36475500  | -16.56230300 L |
| C | -1 | 15.59684500 | -0.80369200 | -16.94668700 L |
| C | -1 | 15.28219500 | -2.01508300 | -16.33076300 L |
| C | -1 | 14.37082700 | -2.04417800 | -15.27613200 L |
| C | -1 | 13.73977500 | -0.86801300 | -14.85433800 L |
| S | -1 | 13.18173700 | 4.52483600  | -14.53039500 L |
| S | -1 | 12.60288000 | -0.98624600 | -13.45506700 L |
| H | -1 | 10.02208800 | 4.57477800  | -11.22328800 L |
| H | -1 | 11.18633700 | 0.99851300  | -9.11234000 L  |
| H | -1 | 7.90716100  | -0.97944300 | -5.97044600 L  |
| H | -1 | 5.54746200  | -1.05156300 | -5.30846900 L  |
| H | -1 | 4.04161800  | 0.84826300  | -5.81717500 L  |
| H | -1 | 4.92452600  | 2.87633200  | -6.88363200 L  |
| H | -1 | 6.17625800  | 4.36946300  | -5.38516000 L  |
| H | -1 | 5.11891700  | 6.57090400  | -5.22253000 L  |
| H | -1 | 5.31057500  | 8.18833200  | -7.08341500 L  |
| H | -1 | 6.69902800  | 7.67447500  | -9.04116700 L  |
| H | -1 | 11.38082800 | 0.27003800  | -11.24540100 L |
| H | -1 | 12.17866100 | 4.46226600  | -11.87587900 L |
| H | -1 | 11.99927400 | 5.63969900  | -16.91105800 L |
| H | -1 | 11.08473200 | 4.64446800  | -18.97431600 L |
| H | -1 | 11.22380200 | 2.19644800  | -19.33811500 L |
| H | -1 | 12.25784100 | 0.74722400  | -17.63619100 L |
| H | -1 | 15.18140900 | 1.29336800  | -17.06437700 L |
| H | -1 | 16.34188800 | -0.76496600 | -17.72549700 L |

|   |    |             |             |                |
|---|----|-------------|-------------|----------------|
| H | -1 | 15.75108900 | -2.93072700 | -16.66072100 L |
| H | -1 | 14.15837300 | -2.98439800 | -14.78303900 L |
| C | 0  | 1.19399600  | -1.44802200 | 0.31874400 H   |
| C | 0  | 2.58481100  | -1.46357600 | 0.23628500 H   |
| C | 0  | 3.25501300  | -0.50181200 | -0.54989700 H  |
| C | 0  | 2.48492000  | 0.44986500  | -1.25100700 H  |
| C | 0  | 1.09508300  | 0.43639400  | -1.13314200 H  |
| C | 0  | 0.41760300  | -0.48743400 | -0.33383900 H  |
| C | 0  | 3.33174800  | -2.41097400 | 1.08615800 H   |
| C | 0  | 4.59496700  | 1.42005100  | -2.15293700 H  |
| C | 0  | 5.37300900  | -1.07683300 | 0.47002600 H   |
| N | 0  | 4.64856700  | -0.44925700 | -0.57615000 H  |
| C | 0  | 5.29000800  | 0.35233300  | -1.55303200 H  |
| C | 0  | 4.77066900  | -2.10683200 | 1.22049600 H   |
| C | 0  | 3.13199100  | 1.55789000  | -1.98787200 H  |
| C | 0  | 5.28382900  | 2.31255500  | -2.98817400 H  |
| C | 0  | 6.62308200  | 2.12370000  | -3.27634900 H  |
| C | 0  | 7.26553500  | 0.97559800  | -2.80170300 H  |
| C | 0  | 6.60828600  | 0.09093200  | -1.96337100 H  |
| C | 0  | 6.65613200  | -0.63789100 | 0.84183700 H   |
| C | 0  | 7.35701500  | -1.28889400 | 1.84101500 H   |
| C | 0  | 6.80133000  | -2.38249400 | 2.50857900 H   |
| C | 0  | 5.50812500  | -2.76568500 | 2.21528700 H   |
| O | 0  | 2.78146500  | -3.30242100 | 1.71760200 H   |
| O | 0  | 2.49877100  | 2.49108400  | -2.46081800 H  |
| C | 0  | -1.03312100 | -0.34937600 | -0.04992300 H  |
| C | 0  | -1.96135300 | 0.05261700  | -1.01532000 H  |
| C | 0  | -3.30069500 | 0.25157700  | -0.67993400 H  |
| C | 0  | -3.74484000 | 0.12687000  | 0.64401500 H   |
| C | 0  | -2.80771300 | -0.26782200 | 1.60968500 H   |
| C | 0  | -1.49040200 | -0.53538300 | 1.25909400 H   |
| N | 0  | -5.09444500 | 0.39298500  | 0.98979300 H   |
| C | 0  | -5.78138900 | 1.45311200  | 0.34153300 H   |
| C | 0  | -5.70113600 | -0.27634300 | 2.08988800 H   |
| C | 0  | -4.95848200 | -0.64223500 | 3.21906300 H   |
| C | 0  | -5.57504700 | -1.28417200 | 4.28936100 H   |
| C | 0  | -6.92648000 | -1.58655800 | 4.24615000 H   |
| C | 0  | -7.67260000 | -1.25394000 | 3.11843300 H   |
| C | 0  | -7.05980200 | -0.61114700 | 2.05030200 H   |
| C | 0  | -6.64631700 | 2.29274800  | 1.05427100 H   |
| C | 0  | -7.22554200 | 3.39331200  | 0.43954700 H   |
| C | 0  | -6.97194200 | 3.67377400  | -0.90005800 H  |
| C | 0  | -6.10550400 | 2.85439100  | -1.61289300 H  |
| C | 0  | -5.52661500 | 1.73960700  | -1.00677000 H  |
| S | 0  | -3.22614100 | -0.28547000 | 3.33809200 H   |
| S | 0  | -4.48394000 | 0.64688500  | -1.95734500 H  |

|   |    |              |             |             |   |
|---|----|--------------|-------------|-------------|---|
| H | 0  | 0.74275800   | -2.18968700 | 0.96383800  | H |
| H | 0  | 0.56895500   | 1.23933700  | -1.62667700 | H |
| H | 0  | 4.71907600   | 3.13599300  | -3.40803200 | H |
| H | 0  | 7.16349400   | 2.82079500  | -3.90335500 | H |
| H | 0  | 8.28636600   | 0.76302000  | -3.09892900 | H |
| H | 0  | 7.11579100   | -0.79955500 | -1.62103700 | H |
| H | 0  | 7.09693500   | 0.22523200  | 0.36829600  | H |
| H | 0  | 8.34388900   | -0.93120400 | 2.11211500  | H |
| H | 0  | 7.37247900   | -2.88974500 | 3.26969800  | H |
| H | 0  | 5.01362500   | -3.56328900 | 2.75507800  | H |
| H | 0  | -1.65350900  | 0.19124400  | -2.04446500 | H |
| H | 0  | -0.80190600  | -0.83885100 | 2.03683300  | H |
| H | 0  | -4.98828000  | -1.53992900 | 5.16196000  | H |
| H | 0  | -7.36774600  | -2.10014300 | 5.08510000  | H |
| H | 0  | -8.72493600  | -1.50507100 | 3.05897300  | H |
| H | 0  | -7.63426700  | -0.34354300 | 1.17668400  | H |
| H | 0  | -6.82044200  | 2.10790300  | 2.10600000  | H |
| H | 0  | -7.83596900  | 4.05877700  | 1.03340900  | H |
| H | 0  | -7.43090500  | 4.52947600  | -1.37931100 | H |
| H | 0  | -5.86315800  | 3.08184500  | -2.64177400 | H |
| C | -1 | -12.97173900 | 0.29424500  | 2.50958100  | L |
| C | -1 | -12.72805000 | -0.81103400 | 3.33682000  | L |
| C | -1 | -13.46960200 | -1.99446300 | 3.16109500  | L |
| C | -1 | -14.45193500 | -2.06594900 | 2.15855200  | L |
| C | -1 | -14.63918700 | -0.97791500 | 1.29211200  | L |
| C | -1 | -13.92985300 | 0.21863200  | 1.48847800  | L |
| C | -1 | -11.70503400 | -0.76457300 | 4.40023500  | L |
| C | -1 | -15.33678400 | -4.18310000 | 3.25949200  | L |
| C | -1 | -11.95969700 | -3.21704600 | 4.70345200  | L |
| N | -1 | -13.23756600 | -3.12628300 | 4.02793000  | L |
| C | -1 | -14.31242000 | -4.08042000 | 4.22724400  | L |
| C | -1 | -11.25188100 | -2.03452900 | 5.00006500  | L |
| C | -1 | -15.33399700 | -3.25111000 | 2.11086100  | L |
| C | -1 | -16.36725100 | -5.12349700 | 3.42924200  | L |
| C | -1 | -16.39887700 | -5.93350200 | 4.56567500  | L |
| C | -1 | -15.42145900 | -5.79970400 | 5.54975100  | L |
| C | -1 | -14.39495000 | -4.86783400 | 5.39364600  | L |
| C | -1 | -11.36422300 | -4.45827100 | 4.99612700  | L |
| C | -1 | -10.15624700 | -4.51068600 | 5.69307800  | L |
| C | -1 | -9.54553100  | -3.33631400 | 6.12667400  | L |
| C | -1 | -10.07636700 | -2.09819800 | 5.76149000  | L |
| O | -1 | -11.20801500 | 0.29710100  | 4.73969900  | L |
| O | -1 | -16.08819300 | -3.42620200 | 1.16775300  | L |
| C | -1 | -14.25070400 | 1.41525900  | 0.68259600  | L |
| C | -1 | -14.32256200 | 1.33396600  | -0.71155200 | L |
| C | -1 | -14.64279400 | 2.46064600  | -1.47427900 | L |

|   |    |              |              |               |
|---|----|--------------|--------------|---------------|
| C | -1 | -14.99665700 | 3.66677300   | -0.83589700 L |
| C | -1 | -14.94525600 | 3.74419800   | 0.56895900 L  |
| C | -1 | -14.53048900 | 2.63564700   | 1.31292700 L  |
| N | -1 | -15.42762300 | 4.79734100   | -1.60623500 L |
| C | -1 | -14.81182700 | 5.06350600   | -2.88121700 L |
| C | -1 | -16.47326800 | 5.65178300   | -1.09522300 L |
| C | -1 | -16.56208000 | 5.93334900   | 0.28076800 L  |
| C | -1 | -17.56528600 | 6.79060100   | 0.75479000 L  |
| C | -1 | -18.50302000 | 7.33922400   | -0.12279600 L |
| C | -1 | -18.43656900 | 7.04477600   | -1.48416400 L |
| C | -1 | -17.42777500 | 6.21090200   | -1.96928900 L |
| C | -1 | -14.58957300 | 6.39081700   | -3.29226300 L |
| C | -1 | -14.01361000 | 6.66212400   | -4.53172800 L |
| C | -1 | -13.65922200 | 5.61615000   | -5.38035300 L |
| C | -1 | -13.84772300 | 4.29439400   | -4.97592200 L |
| C | -1 | -14.40824700 | 4.00967200   | -3.72396100 L |
| S | -1 | -15.39335000 | 5.24663300   | 1.48010200 L  |
| S | -1 | -14.62018300 | 2.27123900   | -3.27453200 L |
| H | -1 | -12.40653200 | 1.20893000   | 2.64700100 L  |
| H | -1 | -15.37958200 | -1.03897200  | 0.50568700 L  |
| H | -1 | -17.15118400 | -5.22298700  | 2.69020600 L  |
| H | -1 | -17.19290900 | -6.65302900  | 4.69578600 L  |
| H | -1 | -15.46225300 | -6.41426700  | 6.44010500 L  |
| H | -1 | -13.67926100 | -4.75466800  | 6.19479200 L  |
| H | -1 | -11.82386300 | -5.38334500  | 4.67486700 L  |
| H | -1 | -9.69586300  | -5.46158200  | 5.91274100 L  |
| H | -1 | -8.62848400  | -3.38649800  | 6.69903400 L  |
| H | -1 | -9.53726900  | -1.19622900  | 6.01852500 L  |
| H | -1 | -14.10241600 | 0.39650700   | -1.20873400 L |
| H | -1 | -14.48323300 | 2.70978300   | 2.39290400 L  |
| H | -1 | -17.63037300 | 7.01847000   | 1.81016800 L  |
| H | -1 | -19.28471800 | 7.98765800   | 0.25274000 L  |
| H | -1 | -19.16635800 | 7.46246500   | -2.16586900 L |
| H | -1 | -17.39898000 | 5.99143700   | -3.02877100 L |
| H | -1 | -14.85571100 | 7.21838200   | -2.64787600 L |
| H | -1 | -13.84383300 | 7.68438000   | -4.83064100 L |
| H | -1 | -13.23505700 | 5.82999700   | -6.34956500 L |
| H | -1 | -13.54473900 | 3.48910200   | -5.63391300 L |
| C | -1 | -6.69136600  | -11.98054000 | -3.43209800 L |
| C | -1 | -6.49939200  | -12.91157000 | -2.40101400 L |
| C | -1 | -7.05481100  | -14.20244500 | -2.50285900 L |
| C | -1 | -7.84186200  | -14.52922800 | -3.62442600 L |
| C | -1 | -7.99211100  | -13.60158400 | -4.66960500 L |
| C | -1 | -7.40829600  | -12.32705600 | -4.58788900 L |
| C | -1 | -5.72268100  | -12.55574700 | -1.19935300 L |
| C | -1 | -8.55815300  | -16.67000200 | -2.44857500 L |

|    |    |              |              |                |
|----|----|--------------|--------------|----------------|
| C  | -1 | -5.78987100  | -14.93490200 | -0.48059600 L  |
| N  | -1 | -6.86882400  | -15.16202000 | -1.43088800 L  |
| C  | -1 | -7.79922500  | -16.27757400 | -1.32275000 L  |
| C  | -1 | -5.29446300  | -13.62710300 | -0.28384600 L  |
| C  | -1 | -8.54624300  | -15.82540100 | -3.65656800 L  |
| C  | -1 | -9.40596800  | -17.78933900 | -2.37108600 L  |
| C  | -1 | -9.55865400  | -18.47380000 | -1.16705800 L  |
| C  | -1 | -8.91076300  | -18.01814000 | -0.02229700 L  |
| C  | -1 | -8.05247200  | -16.91951200 | -0.09088800 L  |
| C  | -1 | -5.17281100  | -15.99607600 | 0.21157600 L   |
| C  | -1 | -4.21322800  | -15.74215500 | 1.19382100 L   |
| C  | -1 | -3.81145000  | -14.43422900 | 1.46036400 L   |
| C  | -1 | -4.33380600  | -13.37937500 | 0.71230700 L   |
| O  | -1 | -5.40206500  | -11.39737400 | -0.98967600 L  |
| O  | -1 | -9.17736200  | -16.15980400 | -4.64606400 L  |
| C  | -1 | -7.48992700  | -11.38567500 | -5.73511600 L  |
| C  | -1 | -8.65372300  | -11.27570000 | -6.50683700 L  |
| C  | -1 | -8.66163000  | -10.51584700 | -7.68355700 L  |
| C  | -1 | -7.50599000  | -9.81292900  | -8.08958500 L  |
| C  | -1 | -6.40379100  | -9.79095300  | -7.21744100 L  |
| C  | -1 | -6.38045000  | -10.61100900 | -6.08759600 L  |
| N  | -1 | -7.44163400  | -9.18672600  | -9.38888800 L  |
| C  | -1 | -8.23299900  | -9.74399300  | -10.46704400 L |
| C  | -1 | -6.62328600  | -8.00748700  | -9.61688600 L  |
| C  | -1 | -5.50041000  | -7.71725500  | -8.81621300 L  |
| C  | -1 | -4.70751000  | -6.59429800  | -9.08343300 L  |
| C  | -1 | -5.04923200  | -5.71337000  | -10.10149300 L |
| C  | -1 | -6.18145000  | -5.95367000  | -10.86717300 L |
| C  | -1 | -6.95925900  | -7.08715100  | -10.63731400 L |
| C  | -1 | -7.73027600  | -9.78793400  | -11.78520700 L |
| C  | -1 | -8.56083700  | -10.14709500 | -12.85059000 L |
| C  | -1 | -9.90049100  | -10.45376600 | -12.61744000 L |
| C  | -1 | -10.38703300 | -10.48526000 | -11.31350900 L |
| C  | -1 | -9.54816600  | -10.18809100 | -10.23513300 L |
| S- | -1 | -4.98773800  | -8.70876100  | -7.41733700 L  |
| S- | -1 | -10.22392200 | -10.40895000 | -8.58033500 L  |
| H  | -1 | -6.27307000  | -10.98626400 | -3.33690300 L  |
| H  | -1 | -8.55702500  | -13.87612600 | -5.55196100 L  |
| H  | -1 | -9.97723300  | -18.11424600 | -3.23175800 L  |
| H  | -1 | -10.21899800 | -19.32892000 | -1.10983700 L  |
| H  | -1 | -9.08437700  | -18.51040400 | 0.92478500 L   |
| H  | -1 | -7.61635600  | -16.55907300 | 0.82950700 L   |
| H  | -1 | -5.42816700  | -17.02241000 | -0.00533100 L  |
| H  | -1 | -3.77774400  | -16.56202800 | 1.74583000 L   |
| H  | -1 | -3.06297400  | -14.24157700 | 2.21763000 L   |
| H  | -1 | -3.96279200  | -12.37693300 | 0.88885800 L   |

|   |    |              |              |              |   |
|---|----|--------------|--------------|--------------|---|
| H | -1 | -9.55374800  | -11.79955300 | -6.20852800  | L |
| H | -1 | -5.48149200  | -10.64495900 | -5.48465600  | L |
| H | -1 | -3.83179300  | -6.38824200  | -8.48006300  | L |
| H | -1 | -4.44801100  | -4.83314100  | -10.28290500 | L |
| H | -1 | -6.45786600  | -5.25371200  | -11.63398800 | L |
| H | -1 | -7.84668900  | -7.22014700  | -11.23969300 | L |
| H | -1 | -6.70593700  | -9.50657000  | -11.99293800 | L |
| H | -1 | -8.17552600  | -10.15877400 | -13.86049000 | L |
| H | -1 | -10.56400800 | -10.67167000 | -13.44302900 | L |
| H | -1 | -11.41793300 | -10.75539900 | -11.13798500 | L |
| C | -1 | 5.21517500   | 4.03334200   | 8.87577400   | L |
| C | -1 | 4.53289400   | 3.43291600   | 9.94163600   | L |
| C | -1 | 3.59384800   | 4.16255200   | 10.67941700  | L |
| C | -1 | 3.27448200   | 5.47371800   | 10.27472500  | L |
| C | -1 | 3.90518900   | 6.04034500   | 9.14999900   | L |
| C | -1 | 4.88006600   | 5.32370600   | 8.42578600   | L |
| C | -1 | 4.70219000   | 1.99713900   | 10.21489200  | L |
| C | -1 | 1.82194000   | 5.70913900   | 12.34530700  | L |
| C | -1 | 2.92535000   | 2.10917000   | 11.95473500  | L |
| N | -1 | 2.92985100   | 3.56347200   | 11.82142800  | L |
| C | -1 | 2.28355100   | 4.44637300   | 12.77508500  | L |
| C | -1 | 3.85551800   | 1.33919100   | 11.22423900  | L |
| C | -1 | 2.23158800   | 6.20150700   | 11.01922400  | L |
| C | -1 | 1.06903300   | 6.51375600   | 13.21407800  | L |
| C | -1 | 0.85260800   | 6.11424700   | 14.53268100  | L |
| C | -1 | 1.40686300   | 4.92050000   | 14.99511700  | L |
| C | -1 | 2.15053200   | 4.11119400   | 14.13690600  | L |
| C | -1 | 1.97557400   | 1.43076600   | 12.75051900  | L |
| C | -1 | 2.06345800   | 0.05072400   | 12.94384000  | L |
| C | -1 | 3.01380600   | -0.69486200  | 12.25387500  | L |
| C | -1 | 3.90049000   | -0.05843100  | 11.38977700  | L |
| O | -1 | 5.45746700   | 1.33706000   | 9.52623500   | L |
| O | -1 | 1.73394100   | 7.21486000   | 10.55578900  | L |
| C | -1 | 5.41906200   | 5.83668100   | 7.11968100   | L |
| C | -1 | 5.43491300   | 7.20584600   | 6.81112000   | L |
| C | -1 | 5.69562800   | 7.64903600   | 5.50567400   | L |
| C | -1 | 5.93048600   | 6.71844300   | 4.46957800   | L |
| C | -1 | 6.03068100   | 5.35573100   | 4.79952300   | L |
| C | -1 | 5.81401800   | 4.93945300   | 6.11304700   | L |
| N | -1 | 6.04645300   | 7.15993600   | 3.10559300   | L |
| C | -1 | 5.30924300   | 8.32661700   | 2.68154400   | L |
| C | -1 | 6.77134400   | 6.39199200   | 2.11786700   | L |
| C | -1 | 6.76624600   | 4.98786200   | 2.14219000   | L |
| C | -1 | 7.14598800   | 4.26960400   | 0.99988300   | L |
| C | -1 | 7.58222400   | 4.93693800   | -0.14439500  | L |
| C | -1 | 7.73630900   | 6.32183400   | -0.11991200  | L |

|    |    |             |             |                |
|----|----|-------------|-------------|----------------|
| C  | -1 | 7.36148100  | 7.04420800  | 1.01344800 L   |
| C  | -1 | 4.72558200  | 8.37310800  | 1.39787800 L   |
| C  | -1 | 4.20761600  | 9.56419300  | 0.89803000 L   |
| C  | -1 | 4.19543500  | 10.70543300 | 1.69908300 L   |
| C  | -1 | 4.68562600  | 10.64951000 | 3.00365600 L   |
| C  | -1 | 5.21879500  | 9.45795500  | 3.50917300 L   |
| S- | -1 | 6.29038500  | 4.03126500  | 3.58940100 L   |
| S- | -1 | 5.75126800  | 9.43890700  | 5.23287700 L   |
| H  | -1 | 5.97706200  | 3.45948600  | 8.37215500 L   |
| H  | -1 | 3.59597900  | 7.02303500  | 8.82238500 L   |
| H  | -1 | 0.66799400  | 7.45743000  | 12.87493600 L  |
| H  | -1 | 0.28247700  | 6.74366300  | 15.20368100 L  |
| H  | -1 | 1.26436000  | 4.61829000  | 16.02109800 L  |
| H  | -1 | 2.60643800  | 3.21667900  | 14.54089300 L  |
| H  | -1 | 1.15867200  | 1.95076500  | 13.22780300 L  |
| H  | -1 | 1.39600300  | -0.44166000 | 13.63662600 L  |
| H  | -1 | 3.04797900  | -1.77059700 | 12.37110500 L  |
| H  | -1 | 4.61084500  | -0.66117000 | 10.84154200 L  |
| H  | -1 | 5.21547800  | 7.93708100  | 7.57553500 L   |
| H  | -1 | 5.84267600  | 3.87752400  | 6.29526300 L   |
| H  | -1 | 7.09749700  | 3.18820600  | 0.99504000 L   |
| H  | -1 | 7.85131900  | 4.37562300  | -1.03105300 L  |
| H  | -1 | 8.13898500  | 6.83726200  | -0.98132300 L  |
| H  | -1 | 7.45816800  | 8.12371700  | 1.00059300 L   |
| H  | -1 | 4.70312000  | 7.49290300  | 0.76765200 L   |
| H  | -1 | 3.81805500  | 9.59752400  | -0.11164100 L  |
| H  | -1 | 3.79102500  | 11.63090700 | 1.31949500 L   |
| H  | -1 | 4.64472700  | 11.53592300 | 3.62422500 L   |
| C  | -1 | 8.74432600  | 9.47240000  | -7.53147000 L  |
| C  | -1 | 9.73239500  | 9.24716000  | -8.50629200 L  |
| C  | -1 | 9.91590400  | 10.18539500 | -9.53772700 L  |
| C  | -1 | 9.18555300  | 11.38680400 | -9.52812500 L  |
| C  | -1 | 8.24178000  | 11.62527700 | -8.52297400 L  |
| C  | -1 | 7.95357200  | 10.63534100 | -7.56926800 L  |
| C  | -1 | 10.53353900 | 8.00362400  | -8.52272700 L  |
| C  | -1 | 9.75106100  | 11.70912500 | -11.96616900 L |
| C  | -1 | 11.79373300 | 8.85659800  | -10.49678300 L |
| N  | -1 | 10.77546400 | 9.87600800  | -10.65989500 L |
| C  | -1 | 10.46060100 | 10.48829600 | -11.94085300 L |
| C  | -1 | 11.63679300 | 7.86919700  | -9.49962900 L  |
| C  | -1 | 9.28793600  | 12.28210700 | -10.69227200 L |
| C  | -1 | 9.35754600  | 12.27373400 | -13.18951600 L |
| C  | -1 | 9.66870100  | 11.63673600 | -14.38950800 L |
| C  | -1 | 10.33209300 | 10.41132800 | -14.37495000 L |
| C  | -1 | 10.70904300 | 9.82791700  | -13.16099100 L |
| C  | -1 | 12.96507800 | 8.85546200  | -11.27955000 L |



|   |    |             |             |                |
|---|----|-------------|-------------|----------------|
| C | -1 | 13.89347300 | 7.81742800  | -11.16370500 L |
| C | -1 | 13.67929300 | 6.78469000  | -10.24987700 L |
| C | -1 | 12.56492800 | 6.81586000  | -9.40779100 L  |
| O | -1 | 10.31429600 | 7.11677700  | -7.71363500 L  |
| O | -1 | 8.93222900  | 13.44651700 | -10.62210400 L |
| C | -1 | 6.68276700  | 10.69729500 | -6.80335100 L  |
| C | -1 | 5.51325400  | 11.10857600 | -7.45953500 L  |
| C | -1 | 4.26131500  | 10.96052400 | -6.86611800 L  |
| C | -1 | 4.15212200  | 10.36248100 | -5.59951300 L  |
| C | -1 | 5.32615200  | 10.01096700 | -4.90110200 L  |
| C | -1 | 6.58223200  | 10.18948800 | -5.49933600 L  |
| N | -1 | 2.86698800  | 9.99749100  | -5.07532200 L  |
| C | -1 | 1.70095400  | 10.79888200 | -5.35906000 L  |
| C | -1 | 2.74882900  | 8.74195000  | -4.37537400 L  |
| C | -1 | 3.74800400  | 8.33528300  | -3.47190600 L  |
| C | -1 | 3.61036000  | 7.12926800  | -2.77223600 L  |
| C | -1 | 2.52588200  | 6.28766400  | -3.02720500 L  |
| C | -1 | 1.57067700  | 6.64981700  | -3.97766900 L  |
| C | -1 | 1.66839100  | 7.87789900  | -4.63552500 L  |
| C | -1 | 0.65597400  | 10.88713900 | -4.41886700 L  |
| C | -1 | -0.50887000 | 11.60097000 | -4.71457800 L  |
| C | -1 | -0.64309800 | 12.24252800 | -5.94302800 L  |
| C | -1 | 0.39031700  | 12.17555500 | -6.87436100 L  |
| C | -1 | 1.56731700  | 11.47592500 | -6.58532100 L  |
| S | -1 | 5.26384800  | 9.29418000  | -3.23626400 L  |
| S | -1 | 2.83575200  | 11.44606700 | -7.86515700 L  |
| H | -1 | 8.53014000  | 8.70023000  | -6.80350000 L  |
| H | -1 | 7.64606200  | 12.53001400 | -8.55716800 L  |
| H | -1 | 8.74795100  | 13.16645500 | -13.21307500 L |
| H | -1 | 9.35356700  | 12.06963800 | -15.33015500 L |
| H | -1 | 10.51801700 | 9.89801800  | -15.30756800 L |
| H | -1 | 11.14853600 | 8.84150600  | -13.17759100 L |
| H | -1 | 13.16264000 | 9.65724500  | -11.97899000 L |
| H | -1 | 14.78152000 | 7.81488100  | -11.78187500 L |
| H | -1 | 14.39391100 | 5.97499100  | -10.17286500 L |
| H | -1 | 12.44351200 | 6.03323200  | -8.66892300 L  |
| H | -1 | 5.55878900  | 11.47712900 | -8.47694600 L  |
| H | -1 | 7.47361200  | 9.88059700  | -4.96731200 L  |
| H | -1 | 4.37013000  | 6.81949000  | -2.06516600 L  |
| H | -1 | 2.43672300  | 5.34548700  | -2.50289800 L  |
| H | -1 | 0.74837700  | 5.98174600  | -4.19974300 L  |
| H | -1 | 0.91457700  | 8.14429600  | -5.36516800 L  |
| H | -1 | 0.74194800  | 10.39365200 | -3.46136100 L  |
| H | -1 | -1.31514700 | 11.65166200 | -3.99915200 L  |
| H | -1 | -1.54867900 | 12.78819200 | -6.17631100 L  |
| H | -1 | 0.27622200  | 12.66886100 | -7.82757800 L  |

|   |    |             |              |                |
|---|----|-------------|--------------|----------------|
| C | -1 | -2.54500400 | -12.61850500 | -6.55653400 L  |
| C | -1 | -3.03287000 | -13.66212600 | -7.35692900 L  |
| C | -1 | -3.57929600 | -13.38015200 | -8.62479100 L  |
| C | -1 | -3.58078500 | -12.05344200 | -9.09205600 L  |
| C | -1 | -3.01973400 | -11.03754600 | -8.31311400 L  |
| C | -1 | -2.57125400 | -11.29056500 | -7.00839000 L  |
| C | -1 | -2.95231100 | -15.06025000 | -6.89744500 L  |
| C | -1 | -4.85278900 | -12.80066300 | -11.15515900 L |
| C | -1 | -3.67180000 | -15.81790900 | -9.15204500 L  |
| N | -1 | -4.06705900 | -14.45183300 | -9.47024800 L  |
| C | -1 | -4.88940200 | -14.11084700 | -10.62550500 L |
| C | -1 | -3.28447400 | -16.14604500 | -7.83538600 L  |
| C | -1 | -4.13403900 | -11.74983200 | -10.42374700 L |
| C | -1 | -5.49447200 | -12.51078000 | -12.37258700 L |
| C | -1 | -6.15944200 | -13.51609700 | -13.06875100 L |
| C | -1 | -6.26123600 | -14.79047000 | -12.51358000 L |
| C | -1 | -5.71111400 | -15.06080600 | -11.26245400 L |
| C | -1 | -3.57414900 | -16.82226600 | -10.13857600 L |
| C | -1 | -3.36243900 | -18.15452900 | -9.77813000 L  |
| C | -1 | -3.18662200 | -18.49443800 | -8.43800600 L  |
| C | -1 | -3.10238500 | -17.49250900 | -7.47228200 L  |
| O | -1 | -2.53169300 | -15.31847100 | -5.78105300 L  |
| O | -1 | -4.00328700 | -10.63829800 | -10.91139300 L |
| C | -1 | -2.27736900 | -10.16194500 | -6.08015400 L  |
| C | -1 | -1.81052400 | -8.92532900  | -6.55891200 L  |
| C | -1 | -1.75577500 | -7.80181900  | -5.72556300 L  |
| C | -1 | -2.14080200 | -7.91201600  | -4.37828300 L  |
| C | -1 | -2.53515100 | -9.16410800  | -3.87498400 L  |
| C | -1 | -2.61932000 | -10.26607600 | -4.72317500 L  |
| N | -1 | -2.22096500 | -6.75266200  | -3.54013300 L  |
| C | -1 | -1.31177500 | -5.65074800  | -3.71883300 L  |
| C | -1 | -3.31177600 | -6.66094200  | -2.60067800 L  |
| C | -1 | -3.72377800 | -7.79305900  | -1.87504700 L  |
| C | -1 | -4.78079800 | -7.69652200  | -0.96279700 L  |
| C | -1 | -5.50004600 | -6.50782800  | -0.84813700 L  |
| C | -1 | -5.14682900 | -5.40244000  | -1.62415000 L  |
| C | -1 | -4.03458800 | -5.46227300  | -2.46324300 L  |
| C | -1 | -0.90726300 | -4.89352100  | -2.60647200 L  |
| C | -1 | -0.14460900 | -3.73611100  | -2.77005100 L  |
| C | -1 | 0.24687600  | -3.33798000  | -4.04582300 L  |
| C | -1 | -0.09356800 | -4.11685100  | -5.15424300 L  |
| C | -1 | -0.85625000 | -5.28372100  | -4.99757500 L  |
| S | -1 | -2.96678200 | -9.40941800  | -2.13327500 L  |
| S | -1 | -1.25700700 | -6.23230200  | -6.48563000 L  |
| H | -1 | -2.14040000 | -12.84530500 | -5.58051600 L  |
| H | -1 | -2.99689500 | -10.03622100 | -8.71445600 L  |

|   |    |             |              |              |   |
|---|----|-------------|--------------|--------------|---|
| H | -1 | -5.45664000 | -11.51658000 | -12.79946400 | L |
| H | -1 | -6.60094200 | -13.30412200 | -14.03454000 | L |
| H | -1 | -6.74608300 | -15.58478700 | -13.06033200 | L |
| H | -1 | -5.89364600 | -16.03293200 | -10.82737300 | L |
| H | -1 | -3.65723800 | -16.58514300 | -11.18961100 | L |
| H | -1 | -3.34037700 | -18.92404700 | -10.53912800 | L |
| H | -1 | -3.06232000 | -19.52974600 | -8.15510200  | L |
| H | -1 | -2.86690100 | -17.76669100 | -6.45115300  | L |
| H | -1 | -1.51351500 | -8.81473300  | -7.59357800  | L |
| H | -1 | -3.03088000 | -11.18475300 | -4.32647000  | L |
| H | -1 | -5.08205600 | -8.55921900  | -0.38169200  | L |
| H | -1 | -6.34524800 | -6.45662800  | -0.17630800  | L |
| H | -1 | -5.73244000 | -4.49592500  | -1.58116500  | L |
| H | -1 | -3.76824500 | -4.58904600  | -3.04446300  | L |
| H | -1 | -1.18936900 | -5.20833500  | -1.61318800  | L |
| H | -1 | 0.15497800  | -3.15633000  | -1.90699500  | L |
| H | -1 | 0.83427600  | -2.43865300  | -4.17092900  | L |
| H | -1 | 0.23942800  | -3.81203400  | -6.13828300  | L |
| C | -1 | 7.59258300  | 2.59562100   | -12.65676600 | L |
| C | -1 | 8.28252900  | 1.40384900   | -12.92012500 | L |
| C | -1 | 8.10787300  | 0.29498600   | -12.07782800 | L |
| C | -1 | 7.23021100  | 0.37948600   | -10.98727500 | L |
| C | -1 | 6.46168400  | 1.53300900   | -10.79809600 | L |
| C | -1 | 6.62252300  | 2.65530300   | -11.63470300 | L |
| C | -1 | 9.11109900  | 1.24671300   | -14.13017700 | L |
| C | -1 | 8.17619900  | -1.80463100  | -10.12148600 | L |
| C | -1 | 9.20691100  | -1.20550400  | -13.72345500 | L |
| N | -1 | 8.79907100  | -0.94430600  | -12.35437400 | L |
| C | -1 | 9.02257000  | -1.86334300  | -11.25182800 | L |
| C | -1 | 9.41246400  | -0.11831000  | -14.60241700 | L |
| C | -1 | 7.13529400  | -0.76349100  | -10.06191000 | L |
| C | -1 | 8.38894300  | -2.66617900  | -9.03483500  | L |
| C | -1 | 9.45789300  | -3.55936100  | -9.05019400  | L |
| C | -1 | 10.32504000 | -3.59855600  | -10.14182400 | L |
| C | -1 | 10.11970300 | -2.74790000  | -11.23123900 | L |
| C | -1 | 9.32215700  | -2.51611800  | -14.22772000 | L |
| C | -1 | 9.73822000  | -2.73529500  | -15.54447900 | L |
| C | -1 | 9.99964800  | -1.65458600  | -16.38760200 | L |
| C | -1 | 9.81604100  | -0.35062800  | -15.92711500 | L |
| O | -1 | 9.49530200  | 2.22088000   | -14.75574500 | L |
| O | -1 | 6.24060500  | -0.82465400  | -9.23432700  | L |
| C | -1 | 5.71574100  | 3.83870100   | -11.50352500 | L |
| C | -1 | 5.06780400  | 4.12719900   | -10.28776100 | L |
| C | -1 | 4.17099900  | 5.19198100   | -10.17855800 | L |
| C | -1 | 3.97334000  | 6.04905500   | -11.27128400 | L |
| C | -1 | 4.60467200  | 5.77062300   | -12.49520800 | L |

|    |    |             |             |                |
|----|----|-------------|-------------|----------------|
| C  | -1 | 5.42995300  | 4.65249500  | -12.61593700 L |
| N  | -1 | 3.17267200  | 7.22562200  | -11.13317100 L |
| C  | -1 | 1.98979800  | 7.20116200  | -10.31491700 L |
| C  | -1 | 3.60540900  | 8.43288200  | -11.78590700 L |
| C  | -1 | 4.15846800  | 8.38329000  | -13.07801200 L |
| C  | -1 | 4.57083000  | 9.56566300  | -13.70615100 L |
| C  | -1 | 4.49370900  | 10.78632900 | -13.03068100 L |
| C  | -1 | 3.99704000  | 10.83112000 | -11.72701000 L |
| C  | -1 | 3.53679400  | 9.66431600  | -11.11410000 L |
| C  | -1 | 0.84449000  | 7.91235600  | -10.71351200 L |
| C  | -1 | -0.30353800 | 7.90882800  | -9.91851100 L  |
| C  | -1 | -0.30977400 | 7.22424400  | -8.70407000 L  |
| C  | -1 | 0.81544500  | 6.49994000  | -8.30718700 L  |
| C  | -1 | 1.95378600  | 6.45419900  | -9.12360100 L  |
| S- | -1 | 4.37064400  | 6.81621800  | -13.95950900 L |
| S- | -1 | 3.33999000  | 5.42592400  | -8.58242200 L  |
| H  | -1 | 7.77927500  | 3.45323800  | -13.28688700 L |
| H  | -1 | 5.71792800  | 1.52682400  | -10.01555000 L |
| H  | -1 | 7.75300100  | -2.62139700 | -8.15931100 L  |
| H  | -1 | 9.63047100  | -4.19659000 | -8.19830500 L  |
| H  | -1 | 11.16744000 | -4.27869800 | -10.13670900 L |
| H  | -1 | 10.83196700 | -2.77238400 | -12.04179500 L |
| H  | -1 | 9.07675600  | -3.37134900 | -13.61337400 L |
| H  | -1 | 9.84593000  | -3.74597400 | -15.91630100 L |
| H  | -1 | 10.31382100 | -1.82761900 | -17.40911000 L |
| H  | -1 | 9.95279200  | 0.47347300  | -16.61345600 L |
| H  | -1 | 5.25965100  | 3.53969400  | -9.40325700 L  |
| H  | -1 | 5.84331700  | 4.43279400  | -13.58978500 L |
| H  | -1 | 4.98264900  | 9.53467700  | -14.70708200 L |
| H  | -1 | 4.83045100  | 11.69507300 | -13.51293500 L |
| H  | -1 | 3.95843800  | 11.77186200 | -11.19335200 L |
| H  | -1 | 3.14669600  | 9.71155100  | -10.10775000 L |
| H  | -1 | 0.83741900  | 8.44983000  | -11.65286800 L |
| H  | -1 | -1.19045000 | 8.43455300  | -10.24379400 L |
| H  | -1 | -1.19303300 | 7.24023100  | -8.07879700 L  |
| H  | -1 | 0.79001900  | 5.94985100  | -7.37484400 L  |
| C  | -1 | -6.53576900 | 6.68313100  | -3.57171600 L  |
| C  | -1 | -5.40040900 | 6.31969800  | -2.83586800 L  |
| C  | -1 | -5.29625100 | 6.65972100  | -1.47703700 L  |
| C  | -1 | -6.36958500 | 7.33368700  | -0.86084700 L  |
| C  | -1 | -7.51892400 | 7.67044500  | -1.59932900 L  |
| C  | -1 | -7.60227900 | 7.36772500  | -2.96657800 L  |
| C  | -1 | -4.29736100 | 5.59312800  | -3.47399800 L  |
| C  | -1 | -4.89480200 | 7.76969500  | 1.14427800 L   |
| C  | -1 | -3.19504900 | 5.31318900  | -1.26103100 L  |
| N  | -1 | -4.08426000 | 6.35052800  | -0.72996200 L  |

|   |    |              |             |                |
|---|----|--------------|-------------|----------------|
| C | -1 | -3.82041500  | 7.12614000  | 0.48097100 L   |
| C | -1 | -3.28837600  | 4.94936400  | -2.62581900 L  |
| C | -1 | -6.23582800  | 7.73751700  | 0.54205800 L   |
| C | -1 | -4.67294300  | 8.48853600  | 2.33068700 L   |
| C | -1 | -3.38390500  | 8.62333100  | 2.83908600 L   |
| C | -1 | -2.30552300  | 8.06490400  | 2.15647500 L   |
| C | -1 | -2.51684800  | 7.33467000  | 0.98317400 L   |
| C | -1 | -2.26116700  | 4.61793200  | -0.45905000 L  |
| C | -1 | -1.42909600  | 3.63679600  | -1.00754900 L  |
| C | -1 | -1.50695200  | 3.32865400  | -2.36325000 L  |
| C | -1 | -2.43696500  | 3.97381700  | -3.16824900 L  |
| O | -1 | -4.20186600  | 5.55118400  | -4.68896100 L  |
| O | -1 | -7.21363400  | 8.08831700  | 1.18104400 L   |
| C | -1 | -8.76463800  | 7.80693000  | -3.78804200 L  |
| C | -1 | -9.34321800  | 9.07621100  | -3.61172000 L  |
| C | -1 | -10.35846500 | 9.52614000  | -4.47009500 L  |
| C | -1 | -10.77768800 | 8.72523200  | -5.54468600 L  |
| C | -1 | -10.18382300 | 7.46875600  | -5.73781800 L  |
| C | -1 | -9.22888700  | 6.99805400  | -4.83527600 L  |
| N | -1 | -11.76198200 | 9.20920400  | -6.47056400 L  |
| C | -1 | -12.84537900 | 10.02990600 | -5.99549500 L  |
| C | -1 | -11.57521600 | 8.96755100  | -7.87792900 L  |
| C | -1 | -10.99517100 | 7.76553000  | -8.32052600 L  |
| C | -1 | -10.77286500 | 7.55672300  | -9.68600000 L  |
| C | -1 | -11.12218900 | 8.53701600  | -10.61392600 L |
| C | -1 | -11.72720600 | 9.71790400  | -10.18679400 L |
| C | -1 | -11.93052500 | 9.94672700  | -8.82587800 L  |
| C | -1 | -14.13576800 | 9.89710500  | -6.54223600 L  |
| C | -1 | -15.17126700 | 10.73765000 | -6.12412900 L  |
| C | -1 | -14.92874900 | 11.71385000 | -5.15578200 L  |
| C | -1 | -13.65532900 | 11.84072300 | -4.59586900 L  |
| C | -1 | -12.61860500 | 10.98899900 | -4.99708400 L  |
| S | -1 | -10.55703100 | 6.43964000  | -7.17552200 L  |
| S | -1 | -10.98989700 | 11.20809000 | -4.24783100 L  |
| H | -1 | -6.57571500  | 6.44753200  | -4.62651800 L  |
| H | -1 | -8.33575300  | 8.19122000  | -1.11477400 L  |
| H | -1 | -5.49408900  | 8.97161200  | 2.84750800 L   |
| H | -1 | -3.21987500  | 9.18508400  | 3.74940900 L   |
| H | -1 | -1.30018000  | 8.21121100  | 2.53113000 L   |
| H | -1 | -1.64887400  | 6.95866900  | 0.47081400 L   |
| H | -1 | -2.16746500  | 4.80724500  | 0.59501200 L   |
| H | -1 | -0.72516800  | 3.10967400  | -0.37805600 L  |
| H | -1 | -0.85670200  | 2.58248000  | -2.79767800 L  |
| H | -1 | -2.50614700  | 3.69496500  | -4.21235100 L  |
| H | -1 | -8.98164700  | 9.73567500  | -2.83265700 L  |
| H | -1 | -8.80754000  | 6.01429500  | -4.98804900 L  |

|   |    |              |             |              |   |
|---|----|--------------|-------------|--------------|---|
| H | -1 | -10.33874500 | 6.62742300  | -10.03289500 | L |
| H | -1 | -10.95067300 | 8.36525600  | -11.66705000 | L |
| H | -1 | -12.04591100 | 10.45303000 | -10.91003000 | L |
| H | -1 | -12.35534700 | 10.89219400 | -8.51308000  | L |
| H | -1 | -14.33530900 | 9.14002600  | -7.28898200  | L |
| H | -1 | -16.15873800 | 10.63905500 | -6.55679800  | L |
| H | -1 | -15.72554000 | 12.37399900 | -4.83928100  | L |
| H | -1 | -13.47543500 | 12.59933400 | -3.84382400  | L |
| C | -1 | -2.51195700  | 9.27597300  | 9.21034600   | L |
| C | -1 | -3.79417900  | 9.74807500  | 9.52761300   | L |
| C | -1 | -4.83526300  | 8.83837800  | 9.76224100   | L |
| C | -1 | -4.59714500  | 7.46192400  | 9.70129300   | L |
| C | -1 | -3.31920900  | 6.99720600  | 9.39249400   | L |
| C | -1 | -2.25749300  | 7.89122800  | 9.13767900   | L |
| C | -1 | -4.08483200  | 11.18767900 | 9.66542300   | L |
| C | -1 | -7.09732900  | 7.06953200  | 9.70865400   | L |
| C | -1 | -6.28681500  | 10.62939600 | 10.65926600  | L |
| N | -1 | -6.15843300  | 9.31981000  | 10.06126400  | L |
| C | -1 | -7.28061300  | 8.46951400  | 9.73605900   | L |
| C | -1 | -5.28739700  | 11.59363800 | 10.41524700  | L |
| C | -1 | -5.73303200  | 6.53778800  | 9.88763400   | L |
| C | -1 | -8.16398200  | 6.22766100  | 9.35902000   | L |
| C | -1 | -9.36433700  | 6.77849800  | 8.91315800   | L |
| C | -1 | -9.50273200  | 8.16387900  | 8.82215200   | L |
| C | -1 | -8.48947100  | 9.00977000  | 9.27226300   | L |
| C | -1 | -7.31267200  | 10.92139000 | 11.57338200  | L |
| C | -1 | -7.36606400  | 12.17606700 | 12.18771200  | L |
| C | -1 | -6.44016700  | 13.16520300 | 11.85333500  | L |
| C | -1 | -5.39743700  | 12.87666800 | 10.97270400  | L |
| O | -1 | -3.33334900  | 12.02406500 | 9.19769400   | L |
| O | -1 | -5.54610300  | 5.35849500  | 10.13671900  | L |
| C | -1 | -0.93555800  | 7.36019600  | 8.68985500   | L |
| C | -1 | -0.57208700  | 6.03406400  | 8.97159200   | L |
| C | -1 | 0.41840500   | 5.38591900  | 8.23259000   | L |
| C | -1 | 1.10767200   | 6.08368100  | 7.22819800   | L |
| C | -1 | 0.96106100   | 7.48494400  | 7.17934700   | L |
| C | -1 | -0.08208700  | 8.10931800  | 7.86479200   | L |
| N | -1 | 1.79938100   | 5.39768800  | 6.16382300   | L |
| C | -1 | 2.29493500   | 4.03532300  | 6.32217900   | L |
| C | -1 | 1.78990500   | 6.04690300  | 4.85948200   | L |
| C | -1 | 1.94095500   | 7.44346000  | 4.73593500   | L |
| C | -1 | 1.92614600   | 8.05122700  | 3.47433400   | L |
| C | -1 | 1.71022600   | 7.28761700  | 2.32841100   | L |
| C | -1 | 1.49384600   | 5.91885200  | 2.43988200   | L |
| C | -1 | 1.52246600   | 5.31158600  | 3.69600200   | L |
| C | -1 | 3.22710300   | 3.50806500  | 5.40210200   | L |

|    |    |              |             |               |
|----|----|--------------|-------------|---------------|
| C  | -1 | 3.69986300   | 2.20011800  | 5.50592100 L  |
| C  | -1 | 3.25600200   | 1.38050300  | 6.53381600 L  |
| C  | -1 | 2.35714100   | 1.87806500  | 7.47013500 L  |
| C  | -1 | 1.87767200   | 3.19303400  | 7.37916600 L  |
| S- | -1 | 2.05066400   | 8.51060300  | 6.17449800 L  |
| S- | -1 | 0.69648000   | 3.65931300  | 8.64762200 L  |
| H  | -1 | -1.71276300  | 9.98966800  | 9.06724800 L  |
| H  | -1 | -3.18308900  | 5.93467600  | 9.29414000 L  |
| H  | -1 | -8.04512800  | 5.15216100  | 9.35911900 L  |
| H  | -1 | -10.16574900 | 6.13098100  | 8.58629100 L  |
| H  | -1 | -10.38734700 | 8.58536800  | 8.37967300 L  |
| H  | -1 | -8.62264900  | 10.08141500 | 9.19434900 L  |
| H  | -1 | -8.03786400  | 10.16690100 | 11.84751900 L |
| H  | -1 | -8.11084800  | 12.37847400 | 12.94119000 L |
| H  | -1 | -6.51003900  | 14.14532900 | 12.30548200 L |
| H  | -1 | -4.64793900  | 13.63255700 | 10.77530800 L |
| H  | -1 | -1.09887300  | 5.46835900  | 9.72720700 L  |
| H  | -1 | -0.26463400  | 9.15496200  | 7.66518100 L  |
| H  | -1 | 2.04307600   | 9.12373300  | 3.38515600 L  |
| H  | -1 | 1.69378700   | 7.75573300  | 1.35560100 L  |
| H  | -1 | 1.30755300   | 5.32951500  | 1.55218100 L  |
| H  | -1 | 1.35021900   | 4.26083000  | 3.77524500 L  |
| H  | -1 | 3.60614400   | 4.11341700  | 4.59572500 L  |
| H  | -1 | 4.41986200   | 1.82594800  | 4.79108400 L  |
| H  | -1 | 3.60854300   | 0.36014800  | 6.60668600 L  |
| H  | -1 | 2.02370900   | 1.23103100  | 8.27216100 L  |

QAD-DPTZ(Amorphous 1), S<sub>1</sub>:

|   |    |             |             |               |
|---|----|-------------|-------------|---------------|
| C | -1 | 14.39888100 | -2.86550300 | 3.58802100 L  |
| C | -1 | 13.84652100 | -3.28668900 | 2.37346400 L  |
| C | -1 | 13.06008200 | -4.45086200 | 2.32870100 L  |
| C | -1 | 12.86712500 | -5.20731100 | 3.50102400 L  |
| C | -1 | 13.42134800 | -4.77225000 | 4.71473200 L  |
| C | -1 | 14.16135200 | -3.58409900 | 4.77035100 L  |
| C | -1 | 14.01485600 | -2.48740400 | 1.14613800 L  |
| C | -1 | 11.73464400 | -7.00199600 | 2.10384300 L  |
| C | -1 | 12.25761300 | -3.85728900 | 0.04399200 L  |
| N | -1 | 12.43832000 | -4.85639800 | 1.08664700 L  |
| C | -1 | 12.00425200 | -6.23459700 | 0.94915600 L  |
| C | -1 | 13.09115400 | -2.71745100 | 0.02110700 L  |
| C | -1 | 12.08142600 | -6.45152600 | 3.42889800 L  |
| C | -1 | 11.23224600 | -8.30715900 | 1.97318300 L  |
| C | -1 | 11.04514600 | -8.86526900 | 0.71058900 L  |
| C | -1 | 11.40521000 | -8.14988800 | -0.42808300 L |
| C | -1 | 11.91293600 | -6.85574100 | -0.31071600 L |

|    |    |             |             |               |
|----|----|-------------|-------------|---------------|
| C  | -1 | 11.21311400 | -3.94666400 | -0.89955500 L |
| C  | -1 | 11.09160900 | -2.99872700 | -1.91889300 L |
| C  | -1 | 11.97494900 | -1.92150500 | -1.98244400 L |
| C  | -1 | 12.95877500 | -1.76713700 | -1.00551200 L |
| O  | -1 | 14.86808700 | -1.61690800 | 1.08275600 L  |
| O  | -1 | 11.76592400 | -7.04046400 | 4.44973600 L  |
| C  | -1 | 14.66553200 | -3.06285500 | 6.05921200 L  |
| C  | -1 | 15.30325100 | -3.90588500 | 6.98463900 L  |
| C  | -1 | 15.89910800 | -3.37322600 | 8.13520100 L  |
| C  | -1 | 15.87867100 | -1.98620700 | 8.34730300 L  |
| C  | -1 | 15.21729900 | -1.14635200 | 7.44111000 L  |
| C  | -1 | 14.57691700 | -1.68973900 | 6.33093700 L  |
| N  | -1 | 16.62684700 | -1.40825500 | 9.41652800 L  |
| C  | -1 | 16.69549800 | -2.07231800 | 10.68297300 L |
| C  | -1 | 17.45513400 | -0.27754500 | 9.11342300 L  |
| C  | -1 | 16.97824800 | 0.71886700  | 8.24616900 L  |
| C  | -1 | 17.83363400 | 1.74458300  | 7.82724100 L  |
| C  | -1 | 19.16416100 | 1.76594500  | 8.25007600 L  |
| C  | -1 | 19.64059100 | 0.77312100  | 9.10940300 L  |
| C  | -1 | 18.78914500 | -0.24105900 | 9.54651400 L  |
| C  | -1 | 16.66438900 | -1.32727700 | 11.87332500 L |
| C  | -1 | 16.74108900 | -1.97401100 | 13.10864700 L |
| C  | -1 | 16.87187800 | -3.36302100 | 13.16014500 L |
| C  | -1 | 16.91910500 | -4.10344000 | 11.97931800 L |
| C  | -1 | 16.79433300 | -3.47033900 | 10.73920200 L |
| S- | -1 | 15.27995400 | 0.65693800  | 7.61210600 L  |
| S- | -1 | 16.80178900 | -4.49236000 | 9.24243700 L  |
| H  | -1 | 14.99346300 | -1.96069800 | 3.61827200 L  |
| H  | -1 | 13.25667800 | -5.34334000 | 5.61852000 L  |
| H  | -1 | 11.01929500 | -8.90891800 | 2.84417000 L  |
| H  | -1 | 10.67553700 | -9.87435500 | 0.61668800 L  |
| H  | -1 | 11.30993600 | -8.60862600 | -1.40179800 L |
| H  | -1 | 12.23777800 | -6.34342700 | -1.20488200 L |
| H  | -1 | 10.48056700 | -4.73872900 | -0.84479400 L |
| H  | -1 | 10.30292900 | -3.09189200 | -2.65406600 L |
| H  | -1 | 11.87119700 | -1.18234400 | -2.76615600 L |
| H  | -1 | 13.59057900 | -0.88785600 | -1.03047100 L |
| H  | -1 | 15.38148900 | -4.96832200 | 6.78997200 L  |
| H  | -1 | 14.06943700 | -1.02705200 | 5.64011000 L  |
| H  | -1 | 17.48509400 | 2.49965500  | 7.13666800 L  |
| H  | -1 | 19.82885600 | 2.54349300  | 7.89700600 L  |
| H  | -1 | 20.67584700 | 0.77086100  | 9.42022500 L  |
| H  | -1 | 19.18240400 | -1.02582000 | 10.18063500 L |
| H  | -1 | 16.56393000 | -0.24989200 | 11.84006600 L |
| H  | -1 | 16.70365700 | -1.39842700 | 14.02343800 L |
| H  | -1 | 16.92548500 | -3.87210100 | 14.11179200 L |



|   |    |             |              |               |
|---|----|-------------|--------------|---------------|
| H | -1 | 17.03566100 | -5.17285600  | 12.03136500 L |
| C | -1 | 15.26264100 | -11.62203100 | -2.95868800 L |
| C | -1 | 16.43756100 | -11.24839500 | -2.28145900 L |
| C | -1 | 16.34453300 | -10.52092300 | -1.08605000 L |
| C | -1 | 15.09444000 | -10.31100700 | -0.49225200 L |
| C | -1 | 13.93335800 | -10.71523000 | -1.15105800 L |
| C | -1 | 13.99281600 | -11.27187800 | -2.44670100 L |
| C | -1 | 17.78030900 | -11.55192500 | -2.82039700 L |
| C | -1 | 16.10946300 | -8.52474900  | 0.96511800 L  |
| C | -1 | 18.81497800 | -10.48587600 | -0.81599200 L |
| N | -1 | 17.52025000 | -9.91988300  | -0.50236200 L |
| C | -1 | 17.33711800 | -8.72143400  | 0.29566200 L  |
| C | -1 | 18.96926200 | -11.26179400 | -1.98699900 L |
| C | -1 | 15.02484100 | -9.48944000  | 0.72686300 L  |
| C | -1 | 15.87459600 | -7.34242700  | 1.68312200 L  |
| C | -1 | 16.82733100 | -6.32408000  | 1.68042000 L  |
| C | -1 | 18.01186900 | -6.47713100  | 0.95589400 L  |
| C | -1 | 18.27375900 | -7.67125600  | 0.27584900 L  |
| C | -1 | 19.89862900 | -10.36123000 | 0.07237600 L  |
| C | -1 | 21.13425000 | -10.93350300 | -0.23608800 L |
| C | -1 | 21.29975300 | -11.64464300 | -1.42489700 L |
| C | -1 | 20.22461300 | -11.81188400 | -2.29956100 L |
| O | -1 | 17.90441800 | -12.06623000 | -3.91965700 L |
| O | -1 | 14.06405300 | -9.55565100  | 1.47444100 L  |
| C | -1 | 12.76016600 | -11.32287600 | -3.30568700 L |
| C | -1 | 11.47685200 | -11.22856500 | -2.73583600 L |
| C | -1 | 10.34755900 | -11.00168100 | -3.52262500 L |
| C | -1 | 10.46036200 | -10.93198500 | -4.92145600 L |
| C | -1 | 11.72290200 | -11.11182500 | -5.51384600 L |
| C | -1 | 12.85539600 | -11.29093400 | -4.71111300 L |
| N | -1 | 9.29527600  | -10.70740000 | -5.73008000 L |
| C | -1 | 8.02556900  | -11.25134500 | -5.30999300 L |
| C | -1 | 9.41165200  | -10.01660400 | -6.99069900 L |
| C | -1 | 10.51728000 | -10.23248600 | -7.83133000 L |
| C | -1 | 10.52993200 | -9.68732700  | -9.12206200 L |
| C | -1 | 9.50505700  | -8.83980400  | -9.54008600 L |
| C | -1 | 8.45476300  | -8.54398300  | -8.67539200 L |
| C | -1 | 8.39422000  | -9.14155900  | -7.41513800 L |
| C | -1 | 7.13463900  | -11.78336800 | -6.25846900 L |
| C | -1 | 5.89022800  | -12.28087100 | -5.86836400 L |
| C | -1 | 5.52846900  | -12.27604800 | -4.52245400 L |
| C | -1 | 6.42131400  | -11.79312200 | -3.56573700 L |
| C | -1 | 7.67268000  | -11.29446700 | -3.95024100 L |
| S | -1 | 11.96283100 | -11.17816200 | -7.30818200 L |
| S | -1 | 8.78471500  | -10.71669900 | -2.65569600 L |
| H | -1 | 15.34807400 | -12.15526500 | -3.89511500 L |

|   |    |             |              |              |   |
|---|----|-------------|--------------|--------------|---|
| H | -1 | 12.99476200 | -10.46199100 | -0.69014200  | L |
| H | -1 | 14.93014000 | -7.18019300  | 2.18770300   | L |
| H | -1 | 16.63087700 | -5.40152200  | 2.21132700   | L |
| H | -1 | 18.73501100 | -5.67263800  | 0.93188500   | L |
| H | -1 | 19.18529300 | -7.75385900  | -0.30014900  | L |
| H | -1 | 19.78452000 | -9.84106700  | 1.01362700   | L |
| H | -1 | 21.96197200 | -10.83487400 | 0.45411000   | L |
| H | -1 | 22.25515700 | -12.09190000 | -1.65427100  | L |
| H | -1 | 20.36664600 | -12.39481500 | -3.20162100  | L |
| H | -1 | 11.32936400 | -11.30772700 | -1.66947600  | L |
| H | -1 | 13.81398200 | -11.34739000 | -5.20458400  | L |
| H | -1 | 11.35595800 | -9.88816100  | -9.79203900  | L |
| H | -1 | 9.53874500  | -8.38998400  | -10.52327500 | L |
| H | -1 | 7.68941400  | -7.84639300  | -8.98145700  | L |
| H | -1 | 7.55756000  | -8.91685900  | -6.76621400  | L |
| H | -1 | 7.42009000  | -11.82942400 | -7.29684000  | L |
| H | -1 | 5.21018100  | -12.67862300 | -6.60694100  | L |
| H | -1 | 4.56580000  | -12.66641600 | -4.21799900  | L |
| H | -1 | 6.14883300  | -11.83102200 | -2.51995400  | L |
| C | -1 | 12.64203400 | -2.03659700  | 17.15799800  | L |
| C | -1 | 12.88577200 | -3.14186700  | 17.98523700  | L |
| C | -1 | 12.14427100 | -4.32532700  | 17.80951200  | L |
| C | -1 | 11.16194100 | -4.39685700  | 16.80696900  | L |
| C | -1 | 10.97464100 | -3.30883100  | 15.94052900  | L |
| C | -1 | 11.68401000 | -2.11226000  | 16.13694500  | L |
| C | -1 | 13.90887200 | -3.09536800  | 19.04870100  | L |
| C | -1 | 10.27727000 | -6.51405300  | 17.90795900  | L |
| C | -1 | 13.65422900 | -5.54784500  | 19.35186900  | L |
| N | -1 | 12.37635600 | -5.45713700  | 18.67634700  | L |
| C | -1 | 11.30163000 | -6.41132900  | 18.87571100  | L |
| C | -1 | 14.36208000 | -4.36530500  | 19.64853200  | L |
| C | -1 | 10.27993000 | -5.58205500  | 16.75927800  | L |
| C | -1 | 9.24684400  | -7.45449500  | 18.07770800  | L |
| C | -1 | 9.21516600  | -8.26449300  | 19.21409200  | L |
| C | -1 | 10.19266500 | -8.13066100  | 20.19821700  | L |
| C | -1 | 11.21913400 | -7.19874700  | 20.04211300  | L |
| C | -1 | 14.24975600 | -6.78904400  | 19.64454400  | L |
| C | -1 | 15.45782100 | -6.84141400  | 20.34154500  | L |
| C | -1 | 16.06840000 | -5.66700800  | 20.77509200  | L |
| C | -1 | 15.53759700 | -4.42892300  | 20.40995700  | L |
| O | -1 | 14.40584500 | -2.03367400  | 19.38816500  | L |
| O | -1 | 9.52582900  | -5.75718800  | 15.81622000  | L |
| C | -1 | 11.36310700 | -0.91564700  | 15.33106300  | L |
| C | -1 | 11.29125200 | -0.99694400  | 13.93691400  | L |
| C | -1 | 10.97097100 | 0.12972300   | 13.17418700  | L |
| C | -1 | 10.61705600 | 1.33583400   | 13.81256900  | L |

|   |    |             |             |               |
|---|----|-------------|-------------|---------------|
| C | -1 | 10.66845300 | 1.41326100  | 15.21742500 L |
| C | -1 | 11.08327000 | 0.30472900  | 15.96139400 L |
| N | -1 | 10.18595600 | 2.46639100  | 13.04218200 L |
| C | -1 | 10.80182500 | 2.73257600  | 11.76724900 L |
| C | -1 | 9.14036000  | 3.32078100  | 13.55324400 L |
| C | -1 | 9.05153500  | 3.60234300  | 14.92923400 L |
| C | -1 | 8.04820500  | 4.45955900  | 15.40320700 L |
| C | -1 | 7.11053300  | 5.00813400  | 14.52567100 L |
| C | -1 | 7.17699800  | 4.71368800  | 13.16430300 L |
| C | -1 | 8.18582800  | 3.87985800  | 12.67917800 L |
| C | -1 | 11.02402300 | 4.05989500  | 11.35620300 L |
| C | -1 | 11.59997400 | 4.33122800  | 10.11673800 L |
| C | -1 | 11.95440600 | 3.28526900  | 9.26811300 L  |
| C | -1 | 11.76596400 | 1.96350600  | 9.67254400 L  |
| C | -1 | 11.20545200 | 1.67875900  | 10.92450500 L |
| S | -1 | 10.22029500 | 2.91567800  | 16.12856900 L |
| S | -1 | 10.99350400 | -0.05967500 | 11.37388500 L |
| H | -1 | 13.20728800 | -1.12189600 | 17.29546800 L |
| H | -1 | 10.23433600 | -3.36992700 | 15.15415400 L |
| H | -1 | 8.46291600  | -7.55401900 | 17.33867200 L |
| H | -1 | 8.42125300  | -8.98406300 | 19.34425200 L |
| H | -1 | 10.15189800 | -8.74522600 | 21.08857200 L |
| H | -1 | 11.93473100 | -7.08554200 | 20.84320900 L |
| H | -1 | 13.79015700 | -7.71413800 | 19.32328400 L |
| H | -1 | 15.91824700 | -7.79229000 | 20.56120700 L |
| H | -1 | 16.98553600 | -5.71716000 | 21.34750000 L |
| H | -1 | 16.07665600 | -3.52693100 | 20.66699200 L |
| H | -1 | 11.51135300 | -1.93438400 | 13.43968300 L |
| H | -1 | 11.13043500 | 0.37887400  | 17.04132100 L |
| H | -1 | 7.98319400  | 4.68741700  | 16.45863500 L |
| H | -1 | 6.32880800  | 5.65653400  | 14.90120700 L |
| H | -1 | 6.44719100  | 5.13134600  | 12.48259700 L |
| H | -1 | 8.21454600  | 3.66040200  | 11.61964600 L |
| H | -1 | 10.75784900 | 4.88745000  | 12.00059000 L |
| H | -1 | 11.76970500 | 5.35349200  | 9.81782600 L  |
| H | -1 | 12.37856200 | 3.49913500  | 8.29890200 L  |
| H | -1 | 12.06898200 | 1.15822700  | 9.01455400 L  |
| C | -1 | 14.68741300 | 8.30931800  | -1.77121100 L |
| C | -1 | 14.31235500 | 9.66108200  | -1.88563600 L |
| C | -1 | 14.17946100 | 10.45456600 | -0.72863000 L |
| C | -1 | 14.39833600 | 9.87916000  | 0.53776400 L  |
| C | -1 | 14.75248400 | 8.52266900  | 0.63708200 L  |
| C | -1 | 14.91550800 | 7.73972300  | -0.51173200 L |
| C | -1 | 14.10581800 | 10.28571700 | -3.20760600 L |
| C | -1 | 13.57809100 | 12.03256900 | 1.61975000 L  |
| C | -1 | 14.00949200 | 12.52318500 | -2.11766100 L |

|   |    |             |             |               |
|---|----|-------------|-------------|---------------|
| N | -1 | 13.82149300 | 11.85633900 | -0.83912300 L |
| C | -1 | 13.29538600 | 12.53678400 | 0.33281500 L  |
| C | -1 | 14.04796700 | 11.75938700 | -3.30367300 L |
| C | -1 | 14.22221200 | 10.71230700 | 1.74434700 L  |
| C | -1 | 13.17162100 | 12.74818700 | 2.76083900 L  |
| C | -1 | 12.45824600 | 13.93995000 | 2.62637700 L  |
| C | -1 | 12.09551000 | 14.39305000 | 1.35951600 L  |
| C | -1 | 12.46428500 | 13.67198200 | 0.22427200 L  |
| C | -1 | 14.20914100 | 13.91791400 | -2.20736800 L |
| C | -1 | 14.26872300 | 14.54946700 | -3.45043600 L |
| C | -1 | 14.20081200 | 13.79706300 | -4.62136700 L |
| C | -1 | 14.11371600 | 12.40557700 | -4.55156000 L |
| O | -1 | 14.03202800 | 9.59654000  | -4.21189700 L |
| O | -1 | 14.56131300 | 10.29667700 | 2.83863900 L  |
| C | -1 | 15.50830100 | 6.39190300  | -0.39168200 L |
| C | -1 | 14.80888700 | 5.32934000  | 0.19521300 L  |
| C | -1 | 15.46259000 | 4.11815200  | 0.48186100 L  |
| C | -1 | 16.83679100 | 3.97415800  | 0.19519000 L  |
| C | -1 | 17.51521300 | 5.02566200  | -0.44485900 L |
| C | -1 | 16.84591500 | 6.21392600  | -0.74526500 L |
| N | -1 | 17.54842900 | 2.80132500  | 0.62305100 L  |
| C | -1 | 17.17038800 | 2.17460600  | 1.86222600 L  |
| C | -1 | 18.70431300 | 2.32242100  | -0.09814300 L |
| C | -1 | 19.59072600 | 3.22050600  | -0.71449000 L |
| C | -1 | 20.79684500 | 2.75835600  | -1.25534100 L |
| C | -1 | 21.11848900 | 1.40424500  | -1.20428800 L |
| C | -1 | 20.22048600 | 0.49465500  | -0.64851400 L |
| C | -1 | 19.01443100 | 0.94586400  | -0.11133300 L |
| C | -1 | 18.15889200 | 1.70778300  | 2.75056300 L  |
| C | -1 | 17.80259400 | 0.99009900  | 3.88996000 L  |
| C | -1 | 16.46279900 | 0.70504800  | 4.13753900 L  |
| C | -1 | 15.46991800 | 1.20805300  | 3.29312500 L  |
| C | -1 | 15.81552000 | 1.99503600  | 2.18466700 L  |
| S | -1 | 19.28708600 | 4.99136800  | -0.78004900 L |
| S | -1 | 14.49387200 | 2.76238000  | 1.20854400 L  |
| H | -1 | 14.83599300 | 7.70863200  | -2.66026500 L |
| H | -1 | 14.93723400 | 8.08209300  | 1.60631300 L  |
| H | -1 | 13.38885500 | 12.37857000 | 3.75487300 L  |
| H | -1 | 12.15142700 | 14.49257400 | 3.50564300 L  |
| H | -1 | 11.52604900 | 15.30592700 | 1.25376200 L  |
| H | -1 | 12.10467300 | 14.01437800 | -0.73647600 L |
| H | -1 | 14.33618900 | 14.52509000 | -1.32117900 L |
| H | -1 | 14.38960600 | 15.62325900 | -3.50336100 L |
| H | -1 | 14.26115000 | 14.28967700 | -5.58393300 L |
| H | -1 | 14.12342700 | 11.83467300 | -5.47067900 L |
| H | -1 | 13.76952500 | 5.45774600  | 0.46552700 L  |

|   |    |             |              |               |
|---|----|-------------|--------------|---------------|
| H | -1 | 17.39131700 | 7.03498300   | -1.19339200 L |
| H | -1 | 21.49439200 | 3.45282500   | -1.70837900 L |
| H | -1 | 22.06254700 | 1.06215400   | -1.59795400 L |
| H | -1 | 20.46173900 | -0.56048100  | -0.62736000 L |
| H | -1 | 18.34110500 | 0.22436100   | 0.33344100 L  |
| H | -1 | 19.20823700 | 1.88333700   | 2.54791800 L  |
| H | -1 | 18.56746900 | 0.63480000   | 4.56754400 L  |
| H | -1 | 16.20038100 | 0.09683900   | 4.98670400 L  |
| H | -1 | 14.43403300 | 0.98964800   | 3.51068200 L  |
| C | -1 | 9.65038000  | -11.18081400 | 5.30166400 L  |
| C | -1 | 10.29546000 | -12.33788300 | 4.82774600 L  |
| C | -1 | 10.13882700 | -12.72323300 | 3.48155900 L  |
| C | -1 | 9.40765900  | -11.90429200 | 2.60134100 L  |
| C | -1 | 8.80894300  | -10.72582100 | 3.07457600 L  |
| C | -1 | 8.89983200  | -10.38183800 | 4.43013700 L  |
| C | -1 | 11.13784500 | -13.16489900 | 5.71446300 L  |
| C | -1 | 9.44517400  | -13.77469300 | 0.88615000 L  |
| C | -1 | 11.74976600 | -14.60636300 | 3.77592700 L  |
| N | -1 | 10.68988400 | -13.97686600 | 3.01322900 L  |
| C | -1 | 10.10003500 | -14.58741700 | 1.83431700 L  |
| C | -1 | 11.90965700 | -14.28729900 | 5.14184200 L  |
| C | -1 | 9.21455800  | -12.35562400 | 1.20941600 L  |
| C | -1 | 8.89378700  | -14.34932000 | -0.27226700 L |
| C | -1 | 8.89930400  | -15.73501700 | -0.43442200 L |
| C | -1 | 9.46183200  | -16.55126700 | 0.54552100 L  |
| C | -1 | 10.05621800 | -15.98553500 | 1.67340200 L  |
| C | -1 | 12.67063700 | -15.48713500 | 3.17223200 L  |
| C | -1 | 13.63903900 | -16.13518100 | 3.93979200 L  |
| C | -1 | 13.71861200 | -15.90038300 | 5.31151700 L  |
| C | -1 | 12.86518800 | -14.97309100 | 5.91095100 L  |
| O | -1 | 11.25735800 | -12.87525700 | 6.89351400 L  |
| O | -1 | 8.80722200  | -11.58586400 | 0.35927900 L  |
| C | -1 | 8.13248400  | -9.23166000  | 4.94137400 L  |
| C | -1 | 6.99100900  | -9.44198600  | 5.72072500 L  |
| C | -1 | 6.13870400  | -8.38077900  | 6.03437000 L  |
| C | -1 | 6.48618800  | -7.06841100  | 5.66434600 L  |
| C | -1 | 7.69659100  | -6.84377300  | 4.98356200 L  |
| C | -1 | 8.47349700  | -7.92894400  | 4.57224000 L  |
| N | -1 | 5.58858000  | -5.98322500  | 5.93109500 L  |
| C | -1 | 4.16915700  | -6.20626500  | 5.79733900 L  |
| C | -1 | 6.11369600  | -4.69021600  | 6.29370300 L  |
| C | -1 | 7.34087600  | -4.23745400  | 5.77081300 L  |
| C | -1 | 7.82363500  | -2.97000400  | 6.12199100 L  |
| C | -1 | 7.09162300  | -2.14381800  | 6.97436800 L  |
| C | -1 | 5.87959000  | -2.58737500  | 7.50173500 L  |
| C | -1 | 5.40340500  | -3.86033800  | 7.18365100 L  |

|    |    |              |              |                |
|----|----|--------------|--------------|----------------|
| C  | -1 | 3.34095900   | -5.21668200  | 5.23296900 L   |
| C  | -1 | 1.96385200   | -5.42237500  | 5.12375700 L   |
| C  | -1 | 1.39919500   | -6.62187700  | 5.55990900 L   |
| C  | -1 | 2.21213600   | -7.61826800  | 6.10319800 L   |
| C  | -1 | 3.59595500   | -7.42456100  | 6.20927600 L   |
| S- | -1 | 8.29800200   | -5.19136300  | 4.56588300 L   |
| S- | -1 | 4.59424300   | -8.76688200  | 6.89941700 L   |
| H  | -1 | 9.72588000   | -10.89797300 | 6.34684800 L   |
| H  | -1 | 8.22265500   | -10.10378700 | 2.40618000 L   |
| H  | -1 | 8.40591700   | -13.73545400 | -1.01869200 L  |
| H  | -1 | 8.42255400   | -16.18046600 | -1.29684700 L  |
| H  | -1 | 9.42921000   | -17.62653500 | 0.43901800 L   |
| H  | -1 | 10.44434600  | -16.64551600 | 2.43576400 L   |
| H  | -1 | 12.64755700  | -15.67187200 | 2.10655500 L   |
| H  | -1 | 14.33758000  | -16.80982600 | 3.46790900 L   |
| H  | -1 | 14.47054900  | -16.40553700 | 5.90362500 L   |
| H  | -1 | 12.98131500  | -14.76089800 | 6.96579600 L   |
| H  | -1 | 6.71901400   | -10.44034000 | 6.02303300 L   |
| H  | -1 | 9.34692300   | -7.75146700  | 3.96906400 L   |
| H  | -1 | 8.76191200   | -2.61510700  | 5.71410600 L   |
| H  | -1 | 7.46503900   | -1.15931000  | 7.22501900 L   |
| H  | -1 | 5.31300600   | -1.94744200  | 8.16634200 L   |
| H  | -1 | 4.47337700   | -4.19477900  | 7.62502300 L   |
| H  | -1 | 3.76202000   | -4.28657100  | 4.87393600 L   |
| H  | -1 | 1.33481500   | -4.65030800  | 4.70048600 L   |
| H  | -1 | 0.33278700   | -6.78429400  | 5.47015200 L   |
| H  | -1 | 1.76659400   | -8.55076100  | 6.42706800 L   |
| C  | -1 | -11.21713700 | -0.53559800  | -11.06015100 L |
| C  | -1 | -11.76949600 | -0.95678400  | -12.27470700 L |
| C  | -1 | -12.55593500 | -2.12095600  | -12.31947100 L |
| C  | -1 | -12.74889200 | -2.87740500  | -11.14714700 L |
| C  | -1 | -12.19467000 | -2.44234400  | -9.93343900 L  |
| C  | -1 | -11.45466600 | -1.25419400  | -9.87782100 L  |
| C  | -1 | -11.60116200 | -0.15749800  | -13.50203400 L |
| C  | -1 | -13.88128800 | -4.67209700  | -12.54427900 L |
| C  | -1 | -13.35840500 | -1.52738400  | -14.60418000 L |
| N  | -1 | -13.17769800 | -2.52649300  | -13.56152400 L |
| C  | -1 | -13.61176600 | -3.90469200  | -13.69901600 L |
| C  | -1 | -12.52477700 | -0.38755200  | -14.62701500 L |
| C  | -1 | -13.53459200 | -4.12162000  | -11.21927300 L |
| C  | -1 | -14.38377200 | -5.97725300  | -12.67498800 L |
| C  | -1 | -14.57087200 | -6.53536200  | -13.93758300 L |
| C  | -1 | -14.21072100 | -5.81999100  | -15.07620500 L |
| C  | -1 | -13.70308100 | -4.52583600  | -14.95888800 L |
| C  | -1 | -14.40290300 | -1.61675900  | -15.54772600 L |
| C  | -1 | -14.52432200 | -0.66882900  | -16.56701500 L |

|   |    |              |             |                |
|---|----|--------------|-------------|----------------|
| C | -1 | -13.64106900 | 0.40840000  | -16.63061500 L |
| C | -1 | -12.65724300 | 0.56276900  | -15.65368300 L |
| O | -1 | -10.74784400 | 0.71299000  | -13.56536600 L |
| O | -1 | -13.85009400 | -4.71055800 | -10.19843600 L |
| C | -1 | -10.95048600 | -0.73294900 | -8.58895900 L  |
| C | -1 | -10.31268000 | -1.57598700 | -7.66348400 L  |
| C | -1 | -9.71690900  | -1.04332100 | -6.51297000 L  |
| C | -1 | -9.73726000  | 0.34369000  | -6.30081900 L  |
| C | -1 | -10.39871900 | 1.18355500  | -7.20706200 L  |
| C | -1 | -11.03910000 | 0.64016700  | -8.31723400 L  |
| N | -1 | -8.98917100  | 0.92165000  | -5.23164300 L  |
| C | -1 | -8.92052000  | 0.25758700  | -3.96519900 L  |
| C | -1 | -8.16079800  | 2.05235400  | -5.53469900 L  |
| C | -1 | -8.63777100  | 3.04877200  | -6.40200300 L  |
| C | -1 | -7.78238400  | 4.07448800  | -6.82093100 L  |
| C | -1 | -6.45185600  | 4.09585000  | -6.39809500 L  |
| C | -1 | -5.97534000  | 3.10301900  | -5.53871900 L  |
| C | -1 | -6.82678600  | 2.08883900  | -5.10160800 L  |
| C | -1 | -8.95162900  | 1.00262900  | -2.77484600 L  |
| C | -1 | -8.87492900  | 0.35589500  | -1.53952500 L  |
| C | -1 | -8.74405400  | -1.03312300 | -1.48797700 L  |
| C | -1 | -8.69691300  | -1.77353400 | -2.66885400 L  |
| C | -1 | -8.82168400  | -1.14043400 | -3.90897000 L  |
| S | -1 | -10.33606400 | 2.98684400  | -7.03606600 L  |
| S | -1 | -8.81422800  | -2.16245400 | -5.40573400 L  |
| H | -1 | -10.62255500 | 0.36920700  | -11.02990000 L |
| H | -1 | -12.35934100 | -3.01343400 | -9.02965200 L  |
| H | -1 | -14.59672300 | -6.57901200 | -11.80400200 L |
| H | -1 | -14.94048100 | -7.54444800 | -14.03148300 L |
| H | -1 | -14.30608200 | -6.27872000 | -16.04996900 L |
| H | -1 | -13.37823900 | -4.01352200 | -15.85305300 L |
| H | -1 | -15.13536400 | -2.40883200 | -15.49291600 L |
| H | -1 | -15.31308800 | -0.76198600 | -17.30223700 L |
| H | -1 | -13.74473500 | 1.14755400  | -17.41427800 L |
| H | -1 | -12.02535200 | 1.44204200  | -15.67859300 L |
| H | -1 | -10.23452800 | -2.63841600 | -7.85819900 L  |
| H | -1 | -11.54658100 | 1.30285400  | -9.00806100 L  |
| H | -1 | -8.13092400  | 4.82956000  | -7.51150400 L  |
| H | -1 | -5.78707500  | 4.87339200  | -6.75111600 L  |
| H | -1 | -4.94008500  | 3.10075900  | -5.22789700 L  |
| H | -1 | -6.43352800  | 1.30407800  | -4.46748700 L  |
| H | -1 | -9.05208900  | 2.08001300  | -2.80810600 L  |
| H | -1 | -8.91236000  | 0.93147800  | -0.62473300 L  |
| H | -1 | -8.69053300  | -1.54219400 | -0.53638000 L  |
| H | -1 | -8.58027000  | -2.84295700 | -2.61675700 L  |
| C | -1 | 8.24377400   | -5.85403600 | -6.29955400 L  |

|   |    |             |              |               |
|---|----|-------------|--------------|---------------|
| C | -1 | 6.98649900  | -5.27931000  | -6.07791700 L |
| C | -1 | 6.60313200  | -4.92451700  | -4.77738200 L |
| C | -1 | 7.51134700  | -5.07277600  | -3.71817700 L |
| C | -1 | 8.80962400  | -5.54315600  | -3.96945800 L |
| C | -1 | 9.18714100  | -5.98234400  | -5.25924600 L |
| C | -1 | 6.06653600  | -4.99619000  | -7.19798200 L |
| C | -1 | 5.58951700  | -4.75275300  | -2.09726000 L |
| C | -1 | 4.54042800  | -3.81824100  | -5.62238700 L |
| N | -1 | 5.27358600  | -4.41810300  | -4.52469300 L |
| C | -1 | 4.71657100  | -4.59886700  | -3.19683700 L |
| C | -1 | 4.88297100  | -4.14953500  | -6.95186300 L |
| C | -1 | 7.04233900  | -4.79196000  | -2.34632600 L |
| C | -1 | 5.07279400  | -5.02525400  | -0.81989900 L |
| C | -1 | 3.70033000  | -5.19379500  | -0.64215400 L |
| C | -1 | 2.83514100  | -5.07675800  | -1.72660200 L |
| C | -1 | 3.33595100  | -4.79028900  | -2.99876600 L |
| C | -1 | 3.55746200  | -2.83624800  | -5.39818100 L |
| C | -1 | 2.86945900  | -2.26374100  | -6.47047500 L |
| C | -1 | 3.15469500  | -2.65861100  | -7.77754400 L |
| C | -1 | 4.16258700  | -3.59203400  | -8.02144500 L |
| O | -1 | 6.32150400  | -5.39001000  | -8.32484800 L |
| O | -1 | 7.83380100  | -4.66016400  | -1.42780500 L |
| C | -1 | 10.55088800 | -6.56317400  | -5.52255100 L |
| C | -1 | 11.34180700 | -7.06493200  | -4.47267800 L |
| C | -1 | 12.63399600 | -7.54548700  | -4.70199800 L |
| C | -1 | 13.12668200 | -7.65203700  | -6.01276800 L |
| C | -1 | 12.33895500 | -7.18465900  | -7.07692500 L |
| C | -1 | 11.08837600 | -6.61632900  | -6.82537900 L |
| N | -1 | 14.42099200 | -8.21985700  | -6.26473100 L |
| C | -1 | 15.50315300 | -7.99816300  | -5.33750700 L |
| C | -1 | 14.62624700 | -9.00498100  | -7.45560900 L |
| C | -1 | 14.02875400 | -8.63021100  | -8.67237100 L |
| C | -1 | 14.30348900 | -9.35880200  | -9.83713800 L |
| C | -1 | 15.11561000 | -10.49302700 | -9.78658800 L |
| C | -1 | 15.66505600 | -10.90342700 | -8.57250700 L |
| C | -1 | 15.43016300 | -10.16136000 | -7.41383700 L |
| C | -1 | 16.82797700 | -7.89110200  | -5.80545600 L |
| C | -1 | 17.88832400 | -7.75501600  | -4.91008100 L |
| C | -1 | 17.63945600 | -7.66498400  | -3.54192000 L |
| C | -1 | 16.32783600 | -7.70783100  | -3.07068200 L |
| C | -1 | 15.25991500 | -7.88222100  | -3.95748800 L |
| S | -1 | 12.90650900 | -7.21769600  | -8.79812100 L |
| S | -1 | 13.60654600 | -7.99660100  | -3.24897800 L |
| H | -1 | 8.47190100  | -6.18639600  | -7.29615100 L |
| H | -1 | 9.50519600  | -5.57326500  | -3.14502300 L |
| H | -1 | 5.73286300  | -5.17226700  | 0.02579600 L  |



|   |    |              |              |                |
|---|----|--------------|--------------|----------------|
| H | -1 | 3.30832100   | -5.45889100  | 0.33018600 L   |
| H | -1 | 1.78030500   | -5.25777300  | -1.58473600 L  |
| H | -1 | 2.65293500   | -4.79308300  | -3.83564000 L  |
| H | -1 | 3.35315900   | -2.47844500  | -4.39797800 L  |
| H | -1 | 2.12208600   | -1.50312500  | -6.28811400 L  |
| H | -1 | 2.61629200   | -2.21700500  | -8.60586400 L  |
| H | -1 | 4.40499600   | -3.84819800  | -9.04544700 L  |
| H | -1 | 10.97353700  | -7.08688200  | -3.45872300 L  |
| H | -1 | 10.55346000  | -6.22509300  | -7.67346800 L  |
| H | -1 | 13.87044300  | -9.05727600  | -10.78206000 L |
| H | -1 | 15.31525500  | -11.05655000 | -10.68729300 L |
| H | -1 | 16.27865300  | -11.79355400 | -8.52960300 L  |
| H | -1 | 15.87546400  | -10.48787900 | -6.48179300 L  |
| H | -1 | 17.04307600  | -7.92783100  | -6.86541500 L  |
| H | -1 | 18.90305100  | -7.72654200  | -5.28008300 L  |
| H | -1 | 18.46118300  | -7.55458800  | -2.84785300 L  |
| H | -1 | 16.13758200  | -7.60380600  | -2.01113400 L  |
| C | -1 | -9.14598000  | -5.02663800  | -0.77104100 L  |
| C | -1 | -10.24902800 | -5.26380900  | -1.59711100 L  |
| C | -1 | -11.50491900 | -5.53134400  | -1.03415600 L  |
| C | -1 | -11.65030100 | -5.52510400  | 0.36562500 L   |
| C | -1 | -10.55638700 | -5.17558200  | 1.18411200 L   |
| C | -1 | -9.28594000  | -4.94200000  | 0.62566600 L   |
| C | -1 | -10.12012000 | -5.19417400  | -3.06109600 L  |
| C | -1 | -13.98328900 | -6.51075800  | 0.06408600 L   |
| C | -1 | -12.58980300 | -5.36570400  | -3.27477700 L  |
| N | -1 | -12.63594900 | -5.82281500  | -1.89267800 L  |
| C | -1 | -13.76320200 | -6.54342200  | -1.32989600 L  |
| C | -1 | -11.34032800 | -5.11070100  | -3.87801400 L  |
| C | -1 | -12.93854300 | -5.94946100  | 0.94727500 L   |
| C | -1 | -15.14684100 | -7.08842300  | 0.59910900 L   |
| C | -1 | -16.04040400 | -7.77092200  | -0.22663700 L  |
| C | -1 | -15.75507500 | -7.92662400  | -1.58150600 L  |
| C | -1 | -14.61617100 | -7.33366100  | -2.12878800 L  |
| C | -1 | -13.75928800 | -5.11238700  | -4.02344900 L  |
| C | -1 | -13.67397100 | -4.77530800  | -5.37735400 L  |
| C | -1 | -12.43401100 | -4.58410400  | -5.97713000 L  |
| C | -1 | -11.27293000 | -4.72613900  | -5.22576500 L  |
| O | -1 | -9.01991900  | -5.14663700  | -3.58420500 L  |
| O | -1 | -13.10273400 | -5.92473000  | 2.15495200 L   |
| C | -1 | -8.08209100  | -4.67351300  | 1.47342400 L   |
| C | -1 | -7.92092000  | -5.26074500  | 2.73942500 L   |
| C | -1 | -6.70347300  | -5.16975100  | 3.42988900 L   |
| C | -1 | -5.60538600  | -4.51080600  | 2.84222600 L   |
| C | -1 | -5.77932800  | -3.88720600  | 1.59504600 L   |
| C | -1 | -7.02031600  | -3.91597800  | 0.96009400 L   |

|    |    |              |             |               |
|----|----|--------------|-------------|---------------|
| N  | -1 | -4.32779200  | -4.47568200 | 3.50288800 L  |
| C  | -1 | -4.27284700  | -4.40248300 | 4.94269700 L  |
| C  | -1 | -3.11267600  | -4.51879300 | 2.72075400 L  |
| C  | -1 | -3.04480600  | -3.89825600 | 1.46063200 L  |
| C  | -1 | -1.84712400  | -3.90283800 | 0.73976800 L  |
| C  | -1 | -0.73311000  | -4.58992700 | 1.22000500 L  |
| C  | -1 | -0.79496100  | -5.23447200 | 2.45244400 L  |
| C  | -1 | -1.96757500  | -5.18371000 | 3.20835200 L  |
| C  | -1 | -3.26699000  | -3.64479500 | 5.57756400 L  |
| C  | -1 | -3.17627500  | -3.60834300 | 6.96918300 L  |
| C  | -1 | -4.07789800  | -4.33584200 | 7.74312900 L  |
| C  | -1 | -5.09740900  | -5.06489800 | 7.13083500 L  |
| C  | -1 | -5.21765600  | -5.08162600 | 5.73539200 L  |
| S- | -1 | -4.44651900  | -3.05004500 | 0.71498100 L  |
| S- | -1 | -6.58721900  | -6.02321900 | 5.02308100 L  |
| H  | -1 | -8.17600300  | -4.90308800 | -1.22993500 L |
| H  | -1 | -10.68964200 | -5.12506400 | 2.25570600 L  |
| H  | -1 | -15.35269200 | -7.03206700 | 1.65753600 L  |
| H  | -1 | -16.93730700 | -8.20952900 | 0.18974500 L  |
| H  | -1 | -16.42019300 | -8.50380600 | -2.21085000 L |
| H  | -1 | -14.40978100 | -7.49463300 | -3.17691100 L |
| H  | -1 | -14.73998500 | -5.17703100 | -3.57402800 L |
| H  | -1 | -14.56784200 | -4.66711400 | -5.96929400 L |
| H  | -1 | -12.37080700 | -4.32308400 | -7.02418400 L |
| H  | -1 | -10.32314100 | -4.54414100 | -5.70027800 L |
| H  | -1 | -8.72411200  | -5.82127800 | 3.18976900 L  |
| H  | -1 | -7.12884900  | -3.38916800 | 0.02204200 L  |
| H  | -1 | -1.78833300  | -3.38458500 | -0.20793300 L |
| H  | -1 | 0.17858600   | -4.62037100 | 0.63726900 L  |
| H  | -1 | 0.06847500   | -5.76850100 | 2.82476900 L  |
| H  | -1 | -1.97695000  | -5.66415600 | 4.17587900 L  |
| H  | -1 | -2.55393400  | -3.07708500 | 4.99398800 L  |
| H  | -1 | -2.40153400  | -3.02250300 | 7.44720000 L  |
| H  | -1 | -3.98755900  | -4.33381100 | 8.81772500 L  |
| H  | -1 | -5.79887500  | -5.61562300 | 7.74533900 L  |
| C  | -1 | -18.41269200 | 1.31543800  | 9.58426800 L  |
| C  | -1 | -17.84440200 | 0.92367100  | 10.80998600 L |
| C  | -1 | -17.15486100 | 1.86113600  | 11.60042900 L |
| C  | -1 | -17.04401000 | 3.19244400  | 11.15800600 L |
| C  | -1 | -17.67365200 | 3.58812800  | 9.96462300 L  |
| C  | -1 | -18.34736600 | 2.65370600  | 9.15082600 L  |
| C  | -1 | -17.98346700 | -0.46013800 | 11.30633200 L |
| C  | -1 | -15.42883700 | 3.64629100  | 13.07904700 L |
| C  | -1 | -17.07280900 | 0.25287700  | 13.50681100 L |
| N  | -1 | -16.56802100 | 1.45680600  | 12.86304400 L |
| C  | -1 | -15.52998700 | 2.28800800  | 13.44868500 L |

|   |    |              |             |               |
|---|----|--------------|-------------|---------------|
| C | -1 | -17.68705100 | -0.74728900 | 12.72324000 L |
| C | -1 | -16.23385500 | 4.14635200  | 11.94524600 L |
| C | -1 | -14.53615300 | 4.49083500  | 13.76357500 L |
| C | -1 | -13.70498300 | 3.97770600  | 14.76004500 L |
| C | -1 | -13.70264800 | 2.61065800  | 15.02734000 L |
| C | -1 | -14.58568700 | 1.76505800  | 14.35406800 L |
| C | -1 | -17.04778200 | 0.08892000  | 14.90847700 L |
| C | -1 | -17.49608100 | -1.09607200 | 15.49425800 L |
| C | -1 | -17.99866900 | -2.12498800 | 14.70040700 L |
| C | -1 | -18.11101700 | -1.94883000 | 13.32041900 L |
| O | -1 | -18.40033600 | -1.33914700 | 10.57253300 L |
| O | -1 | -16.18718900 | 5.32447000  | 11.62889400 L |
| C | -1 | -18.95545600 | 3.07421400  | 7.84529600 L  |
| C | -1 | -18.39132700 | 4.12940900  | 7.10602800 L  |
| C | -1 | -18.98131700 | 4.58364000  | 5.92273500 L  |
| C | -1 | -20.10678400 | 3.92795500  | 5.40434300 L  |
| C | -1 | -20.62438600 | 2.80642900  | 6.07433000 L  |
| C | -1 | -20.08677200 | 2.42250400  | 7.31270800 L  |
| N | -1 | -20.70474900 | 4.38113100  | 4.18390700 L  |
| C | -1 | -20.74003900 | 5.78888000  | 3.88553800 L  |
| C | -1 | -21.11639900 | 3.40775000  | 3.20995300 L  |
| C | -1 | -21.70272500 | 2.19707600  | 3.62139700 L  |
| C | -1 | -22.08265600 | 1.24825500  | 2.66115200 L  |
| C | -1 | -21.83394700 | 1.47674800  | 1.30473100 L  |
| C | -1 | -21.21497300 | 2.65953000  | 0.89763100 L  |
| C | -1 | -20.86494300 | 3.62430600  | 1.84197600 L  |
| C | -1 | -21.86903500 | 6.36342400  | 3.27477200 L  |
| C | -1 | -21.87332900 | 7.72230800  | 2.94211000 L  |
| C | -1 | -20.74113500 | 8.50030900  | 3.16669800 L  |
| C | -1 | -19.62023100 | 7.93921600  | 3.77273500 L  |
| C | -1 | -19.63496100 | 6.60140800  | 4.17839200 L  |
| S | -1 | -21.98101800 | 1.81806200  | 5.37662400 L  |
| S | -1 | -18.19982300 | 5.97553600  | 5.06423200 L  |
| H | -1 | -18.90523700 | 0.57080500  | 8.97245400 L  |
| H | -1 | -17.63218200 | 4.62976200  | 9.67303200 L  |
| H | -1 | -14.47607700 | 5.54488600  | 13.52467700 L |
| H | -1 | -13.03274000 | 4.63375100  | 15.29752700 L |
| H | -1 | -13.01609600 | 2.20654900  | 15.75875400 L |
| H | -1 | -14.53805200 | 0.70463600  | 14.55131000 L |
| H | -1 | -16.69900300 | 0.87785100  | 15.55929300 L |
| H | -1 | -17.46535700 | -1.21084500 | 16.56804000 L |
| H | -1 | -18.34248200 | -3.04214800 | 15.16102300 L |
| H | -1 | -18.56808100 | -2.73144200 | 12.72781500 L |
| H | -1 | -17.48798400 | 4.61273800  | 7.44671400 L  |
| H | -1 | -20.55419000 | 1.60600800  | 7.84686100 L  |
| H | -1 | -22.53856000 | 0.31525400  | 2.96749600 L  |

|   |    |              |              |               |
|---|----|--------------|--------------|---------------|
| H | -1 | -22.10596800 | 0.72951100   | 0.57077100 L  |
| H | -1 | -20.99417900 | 2.82685400   | -0.14811500 L |
| H | -1 | -20.36299500 | 4.52476900   | 1.51035900 L  |
| H | -1 | -22.74530800 | 5.76156600   | 3.07118300 L  |
| H | -1 | -22.74797300 | 8.18260600   | 2.51036800 L  |
| H | -1 | -20.74001000 | 9.54084100   | 2.88647700 L  |
| H | -1 | -18.74544900 | 8.55175700   | 3.94708800 L  |
| C | -1 | -19.97940200 | -5.78114800  | 2.30782400 L  |
| C | -1 | -19.95124500 | -6.48076300  | 3.52646700 L  |
| C | -1 | -19.98844900 | -5.77080000  | 4.73705700 L  |
| C | -1 | -20.17783100 | -4.38041400  | 4.72438800 L  |
| C | -1 | -20.28657300 | -3.70003500  | 3.50478200 L  |
| C | -1 | -20.08207100 | -4.37626500  | 2.28424300 L  |
| C | -1 | -19.79219000 | -7.94874800  | 3.56568200 L  |
| C | -1 | -19.28935000 | -4.27993700  | 7.08789700 L  |
| C | -1 | -19.87351300 | -7.88418600  | 6.05395000 L  |
| N | -1 | -19.71756200 | -6.44730300  | 5.98694300 L  |
| C | -1 | -19.10040500 | -5.67764900  | 7.05186800 L  |
| C | -1 | -19.79643100 | -8.64642200  | 4.87160000 L  |
| C | -1 | -20.05487600 | -3.64636100  | 5.99761100 L  |
| C | -1 | -18.63132900 | -3.50573300  | 8.05763600 L  |
| C | -1 | -17.79177900 | -4.11705700  | 8.99271000 L  |
| C | -1 | -17.58487700 | -5.49415400  | 8.95018100 L  |
| C | -1 | -18.20742600 | -6.26676000  | 7.97060000 L  |
| C | -1 | -20.14291800 | -8.53681700  | 7.27341600 L  |
| C | -1 | -20.17580600 | -9.93119300  | 7.33587300 L  |
| C | -1 | -19.97588300 | -10.68682000 | 6.18022400 L  |
| C | -1 | -19.79926600 | -10.04946000 | 4.95044500 L  |
| O | -1 | -19.72252400 | -8.58371900  | 2.52728100 L  |
| O | -1 | -20.51781300 | -2.52477500  | 6.12452700 L  |
| C | -1 | -19.78785200 | -3.60964300  | 1.03122900 L  |
| C | -1 | -19.17624700 | -2.34881600  | 1.10935300 L  |
| C | -1 | -18.78444900 | -1.65476100  | -0.03424900 L |
| C | -1 | -18.92917200 | -2.24402300  | -1.30356300 L |
| C | -1 | -19.57918700 | -3.49111600  | -1.40246000 L |
| C | -1 | -20.00586800 | -4.15707800  | -0.24491400 L |
| N | -1 | -18.37577000 | -1.61255100  | -2.47157300 L |
| C | -1 | -18.32554900 | -0.16935100  | -2.56930300 L |
| C | -1 | -17.89068500 | -2.43093300  | -3.56178500 L |
| C | -1 | -18.59207700 | -3.58262800  | -3.96243700 L |
| C | -1 | -18.24293300 | -4.23456800  | -5.15380000 L |
| C | -1 | -17.17173700 | -3.77850100  | -5.92231500 L |
| C | -1 | -16.42034500 | -2.68661600  | -5.48908200 L |
| C | -1 | -16.75593600 | -2.03519000  | -4.30169900 L |
| C | -1 | -18.37812300 | 0.45555600   | -3.83149500 L |
| C | -1 | -18.20536300 | 1.82936900   | -3.95672100 L |

|   |    |              |              |               |
|---|----|--------------|--------------|---------------|
| C | -1 | -18.07767400 | 2.62174300   | -2.82112300 L |
| C | -1 | -18.07458700 | 2.03152600   | -1.55962600 L |
| C | -1 | -18.18412500 | 0.64140800   | -1.42550100 L |
| S | -1 | -19.95707800 | -4.26726200  | -2.99737000 L |
| S | -1 | -18.05078000 | -0.02635400  | 0.24069400 L  |
| H | -1 | -19.83293400 | -6.33231600  | 1.39012700 L  |
| H | -1 | -20.42675900 | -2.62752400  | 3.52082000 L  |
| H | -1 | -18.74107500 | -2.42876400  | 8.06944500 L  |
| H | -1 | -17.27381600 | -3.52257800  | 9.73260800 L  |
| H | -1 | -16.91855900 | -5.96333500  | 9.66075800 L  |
| H | -1 | -17.95217300 | -7.31529200  | 7.91355800 L  |
| H | -1 | -20.31509800 | -7.96836200  | 8.17881100 L  |
| H | -1 | -20.34820100 | -10.42603600 | 8.28307800 L  |
| H | -1 | -19.99453500 | -11.76804500 | 6.23142100 L  |
| H | -1 | -19.69777200 | -10.65133700 | 4.05988400 L  |
| H | -1 | -18.94878700 | -1.90381500  | 2.06695300 L  |
| H | -1 | -20.49972100 | -5.11217200  | -0.35403200 L |
| H | -1 | -18.80209100 | -5.09987300  | -5.48644700 L |
| H | -1 | -16.91138200 | -4.28384900  | -6.84395400 L |
| H | -1 | -15.58173800 | -2.33839100  | -6.07877400 L |
| H | -1 | -16.16254100 | -1.18476500  | -3.98804600 L |
| H | -1 | -18.51797000 | -0.12428200  | -4.73015600 L |
| H | -1 | -18.17807700 | 2.27650400   | -4.93965100 L |
| H | -1 | -17.96845100 | 3.68947200   | -2.92191400 L |
| H | -1 | -17.95953700 | 2.65598600   | -0.68264600 L |
| C | -1 | 9.27207500   | 12.09056900  | 5.57573200 L  |
| C | -1 | 8.92495700   | 13.37425100  | 6.02198500 L  |
| C | -1 | 8.80258500   | 14.42248300  | 5.09771400 L  |
| C | -1 | 8.99219900   | 14.17907000  | 3.72915700 L  |
| C | -1 | 9.24328600   | 12.87401100  | 3.28092800 L  |
| C | -1 | 9.40480300   | 11.81368000  | 4.19746400 L  |
| C | -1 | 8.62767200   | 13.64892100  | 7.44457200 L  |
| C | -1 | 9.12437000   | 16.68705900  | 3.36386600 L  |
| C | -1 | 7.76622000   | 15.89290300  | 6.80647500 L  |
| N | -1 | 8.48252000   | 15.75384700  | 5.55557000 L  |
| C | -1 | 8.90054600   | 16.87869500  | 4.74359500 L  |
| C | -1 | 7.88344600   | 14.88059500  | 7.78365300 L  |
| C | -1 | 8.97794900   | 15.32878100  | 2.80169100 L  |
| C | -1 | 9.55741700   | 17.76065900  | 2.56920100 L  |
| C | -1 | 9.77885500   | 19.01480800  | 3.14023500 L  |
| C | -1 | 9.60333500   | 19.19821100  | 4.51218400 L  |
| C | -1 | 9.18582600   | 18.13348900  | 5.31422900 L  |
| C | -1 | 6.86311800   | 16.95108000  | 7.02195400 L  |
| C | -1 | 6.14200200   | 17.03117600  | 8.21410900 L  |
| C | -1 | 6.32909900   | 16.07635200  | 9.21242200 L  |
| C | -1 | 7.19517800   | 15.00139900  | 9.00203300 L  |

|   |    |              |             |               |
|---|----|--------------|-------------|---------------|
| O | -1 | 8.93535600   | 12.84820600 | 8.31249500 L  |
| O | -1 | 8.89195400   | 15.15895500 | 1.59641900 L  |
| C | -1 | 9.70493800   | 10.42539400 | 3.72236300 L  |
| C | -1 | 10.37468700  | 10.19702900 | 2.51077300 L  |
| C | -1 | 10.63054000  | 8.89868300  | 2.05406500 L  |
| C | -1 | 10.31756300  | 7.78410300  | 2.85775300 L  |
| C | -1 | 9.64198800   | 8.01177100  | 4.07497500 L  |
| C | -1 | 9.31163500   | 9.30904600  | 4.47326100 L  |
| N | -1 | 10.70234400  | 6.44786500  | 2.46741100 L  |
| C | -1 | 10.81221000  | 6.08194700  | 1.06586000 L  |
| C | -1 | 11.00741700  | 5.46983100  | 3.49417000 L  |
| C | -1 | 10.29645900  | 5.43526400  | 4.70771200 L  |
| C | -1 | 10.49624900  | 4.38521400  | 5.61310900 L  |
| C | -1 | 11.43492700  | 3.39103600  | 5.34741600 L  |
| C | -1 | 12.19746000  | 3.45539000  | 4.18623400 L  |
| C | -1 | 11.99974700  | 4.49379900  | 3.27717200 L  |
| C | -1 | 10.60802000  | 4.74242700  | 0.65760500 L  |
| C | -1 | 10.82679500  | 4.34885900  | -0.66316900 L |
| C | -1 | 11.20466100  | 5.28972500  | -1.61523900 L |
| C | -1 | 11.35587100  | 6.62446100  | -1.24745600 L |
| C | -1 | 11.15024200  | 7.02950400  | 0.07903100 L  |
| S | -1 | 9.10064900   | 6.68882600  | 5.17313300 L  |
| S | -1 | 11.37045000  | 8.78055700  | 0.41682400 L  |
| H | -1 | 9.42468200   | 11.31198500 | 6.31037700 L  |
| H | -1 | 9.32482300   | 12.70008400 | 2.21730200 L  |
| H | -1 | 9.74042900   | 17.62516800 | 1.51468700 L  |
| H | -1 | 10.10467900  | 19.84025600 | 2.52068400 L  |
| H | -1 | 9.80649100   | 20.16306700 | 4.95803400 L  |
| H | -1 | 9.11062900   | 18.28480600 | 6.38135700 L  |
| H | -1 | 6.68727200   | 17.69580200 | 6.25790000 L  |
| H | -1 | 5.42517800   | 17.82813600 | 8.35852900 L  |
| H | -1 | 5.76269400   | 16.14388400 | 10.13081400 L |
| H | -1 | 7.27998600   | 14.23648700 | 9.76345100 L  |
| H | -1 | 10.70803300  | 11.02708900 | 1.90305200 L  |
| H | -1 | 8.74829800   | 9.43306700  | 5.38718900 L  |
| H | -1 | 9.92169300   | 4.34014100  | 6.52925900 L  |
| H | -1 | 11.57735700  | 2.57633000  | 6.04480500 L  |
| H | -1 | 12.94009400  | 2.69933800  | 3.98722400 L  |
| H | -1 | 12.61013000  | 4.52691600  | 2.38861200 L  |
| H | -1 | 10.28039100  | 3.99016600  | 1.36227500 L  |
| H | -1 | 10.69447500  | 3.31331200  | -0.94850200 L |
| H | -1 | 11.36816100  | 4.98801700  | -2.64145900 L |
| H | -1 | 11.63664200  | 7.35022500  | -2.00089700 L |
| C | -1 | -9.64188800  | 13.00048300 | -1.77047800 L |
| C | -1 | -9.87482000  | 14.17006800 | -2.51504500 L |
| C | -1 | -10.72678500 | 15.16337100 | -1.99819200 L |

|   |    |              |             |               |
|---|----|--------------|-------------|---------------|
| C | -1 | -11.22831500 | 15.03394800 | -0.68685600 L |
| C | -1 | -10.99756800 | 13.85461200 | 0.04260300 L  |
| C | -1 | -10.26166100 | 12.80879200 | -0.52698700 L |
| C | -1 | -9.30383100  | 14.34253000 | -3.86805500 L |
| C | -1 | -12.79825600 | 16.97305300 | -1.12383500 L |
| C | -1 | -10.41320700 | 16.56833600 | -4.04618600 L |
| N | -1 | -11.15575100 | 16.26857500 | -2.83333000 L |
| C | -1 | -12.38817600 | 16.95379700 | -2.47449900 L |
| C | -1 | -9.58600300  | 15.58034900 | -4.62377100 L |
| C | -1 | -12.11270800 | 16.08963100 | -0.16298200 L |
| C | -1 | -13.93871700 | 17.69859600 | -0.74482100 L |
| C | -1 | -14.73603600 | 18.30332500 | -1.71499100 L |
| C | -1 | -14.40961400 | 18.18543700 | -3.06497900 L |
| C | -1 | -13.24815100 | 17.50960300 | -3.44735200 L |
| C | -1 | -10.47182600 | 17.83952300 | -4.65486200 L |
| C | -1 | -9.88276900  | 18.05682000 | -5.90199900 L |
| C | -1 | -9.19246500  | 17.02608400 | -6.53594600 L |
| C | -1 | -9.00917200  | 15.80412200 | -5.88790000 L |
| O | -1 | -8.56922400  | 13.48960400 | -4.33962300 L |
| O | -1 | -12.32329100 | 16.18562400 | 1.03490500 L  |
| C | -1 | -10.36951600 | 11.44174100 | 0.02272500 L  |
| C | -1 | -9.79260700  | 11.07437200 | 1.24351700 L  |
| C | -1 | -9.94859600  | 9.76561200  | 1.73390600 L  |
| C | -1 | -10.63778300 | 8.79841600  | 0.96802300 L  |
| C | -1 | -11.20084800 | 9.17678800  | -0.26148700 L |
| C | -1 | -11.10720900 | 10.49661600 | -0.69261200 L |
| N | -1 | -10.81462300 | 7.46012500  | 1.46027100 L  |
| C | -1 | -11.04680500 | 7.26300400  | 2.86835800 L  |
| C | -1 | -10.85283800 | 6.34340500  | 0.54198500 L  |
| C | -1 | -11.38382900 | 6.49093200  | -0.75264900 L |
| C | -1 | -11.43280400 | 5.39314300  | -1.62142300 L |
| C | -1 | -11.01468400 | 4.13345400  | -1.19482900 L |
| C | -1 | -10.50684000 | 3.97003200  | 0.09208600 L  |
| C | -1 | -10.39033500 | 5.07299100  | 0.94240600 L  |
| C | -1 | -11.95906700 | 6.28239700  | 3.30763600 L  |
| C | -1 | -12.13557200 | 6.03837400  | 4.66808600 L  |
| C | -1 | -11.44124700 | 6.79877600  | 5.60689800 L  |
| C | -1 | -10.57175700 | 7.80589500  | 5.18621400 L  |
| C | -1 | -10.37527300 | 8.05067500  | 3.82206500 L  |
| S | -1 | -12.11420700 | 8.03744200  | -1.32513500 L |
| S | -1 | -9.23581000  | 9.37949600  | 3.35427600 L  |
| H | -1 | -9.04944500  | 12.19807200 | -2.19333900 L |
| H | -1 | -11.48529600 | 13.70451200 | 0.99854700 L  |
| H | -1 | -14.25550400 | 17.73372400 | 0.29023100 L  |
| H | -1 | -15.63810500 | 18.81329400 | -1.42058900 L |
| H | -1 | -15.06593200 | 18.60597300 | -3.81674500 L |

|   |    |              |              |               |
|---|----|--------------|--------------|---------------|
| H | -1 | -13.04521700 | 17.39854500  | -4.50372000 L |
| H | -1 | -10.98556300 | 18.66240800  | -4.17724300 L |
| H | -1 | -9.97255700  | 19.02199700  | -6.38440500 L |
| H | -1 | -8.77933200  | 17.18443000  | -7.51997100 L |
| H | -1 | -8.41414600  | 15.03939700  | -6.37253200 L |
| H | -1 | -9.25691600  | 11.81099800  | 1.82952700 L  |
| H | -1 | -11.62030900 | 10.78984600  | -1.59545000 L |
| H | -1 | -11.81017000 | 5.51331500   | -2.62850300 L |
| H | -1 | -11.08671400 | 3.28474900   | -1.86181600 L |
| H | -1 | -10.18743500 | 2.99099600   | 0.42637200 L  |
| H | -1 | -9.95623300  | 4.93056800   | 1.92372100 L  |
| H | -1 | -12.52955800 | 5.69898400   | 2.59608800 L  |
| H | -1 | -12.81284800 | 5.25989100   | 4.99208400 L  |
| H | -1 | -11.58616000 | 6.61579800   | 6.66072900 L  |
| H | -1 | -10.05787900 | 8.40749700   | 5.92266500 L  |
| C | -1 | 5.20372300   | -11.96379800 | 1.77847500 L  |
| C | -1 | 4.57369700   | -11.27035200 | 0.72324900 L  |
| C | -1 | 3.19937400   | -11.46637700 | 0.47592000 L  |
| C | -1 | 2.44618400   | -12.25955800 | 1.36096000 L  |
| C | -1 | 3.08032500   | -12.93588600 | 2.40969100 L  |
| C | -1 | 4.46701300   | -12.83890800 | 2.59034000 L  |
| C | -1 | 5.33086000   | -10.34999200 | -0.14628600 L |
| C | -1 | 0.47791100   | -12.13930900 | -0.22734200 L |
| C | -1 | 3.25293600   | -9.84310600  | -1.43162900 L |
| N | -1 | 2.57087700   | -10.90240400 | -0.70421600 L |
| C | -1 | 1.32093000   | -11.49587300 | -1.15890900 L |
| C | -1 | 4.63566500   | -9.63222500  | -1.23361800 L |
| C | -1 | 1.00781800   | -12.44621100 | 1.11153100 L  |
| C | -1 | -0.77495600  | -12.63057900 | -0.63016300 L |
| C | -1 | -1.14356100  | -12.58982100 | -1.97396700 L |
| C | -1 | -0.25099800  | -12.09372100 | -2.92386500 L |
| C | -1 | 0.97659300   | -11.56130700 | -2.52526600 L |
| C | -1 | 2.56661200   | -8.99623400  | -2.32702000 L |
| C | -1 | 3.27055800   | -8.12752200  | -3.16101400 L |
| C | -1 | 4.65608300   | -8.02521700  | -3.05508000 L |
| C | -1 | 5.33172700   | -8.73225300  | -2.06178500 L |
| O | -1 | 6.51468100   | -10.14606000 | 0.06079400 L  |
| O | -1 | 0.29051500   | -12.93534900 | 1.96822900 L  |
| C | -1 | 5.12126600   | -13.69420200 | 3.60897900 L  |
| C | -1 | 4.80157600   | -15.05637000 | 3.66786300 L  |
| C | -1 | 5.18750600   | -15.83275900 | 4.75867600 L  |
| C | -1 | 5.97251600   | -15.27003100 | 5.78066500 L  |
| C | -1 | 6.38361000   | -13.92673800 | 5.68180000 L  |
| C | -1 | 5.95419200   | -13.14771900 | 4.59430300 L  |
| N | -1 | 6.27470500   | -16.04224800 | 6.94927300 L  |
| C | -1 | 5.25127700   | -16.89856900 | 7.49319700 L  |



|   |    |              |              |               |
|---|----|--------------|--------------|---------------|
| C | -1 | 7.52201300   | -15.85373600 | 7.63738300 L  |
| C | -1 | 8.06163600   | -14.56652400 | 7.79385100 L  |
| C | -1 | 9.19228800   | -14.38465300 | 8.60165200 L  |
| C | -1 | 9.84388600   | -15.48276400 | 9.16761200 L  |
| C | -1 | 9.34880700   | -16.77051000 | 8.95882400 L  |
| C | -1 | 8.18723400   | -16.95630300 | 8.20609200 L  |
| C | -1 | 5.05631400   | -16.98661000 | 8.88527300 L  |
| C | -1 | 4.01817300   | -17.76140700 | 9.40646100 L  |
| C | -1 | 3.16006000   | -18.44638700 | 8.54641400 L  |
| C | -1 | 3.35659700   | -18.38271600 | 7.16589600 L  |
| C | -1 | 4.38970800   | -17.60421200 | 6.63449300 L  |
| S | -1 | 7.33215500   | -13.10901700 | 6.99932300 L  |
| S | -1 | 4.58115900   | -17.53840200 | 4.83764000 L  |
| H | -1 | 6.26937200   | -11.86044800 | 1.94200400 L  |
| H | -1 | 2.49967200   | -13.57239800 | 3.06743400 L  |
| H | -1 | -1.43525100  | -13.10859800 | 0.08112600 L  |
| H | -1 | -2.09720800  | -12.99572300 | -2.28468800 L |
| H | -1 | -0.50225700  | -12.13267500 | -3.97370000 L |
| H | -1 | 1.66510000   | -11.23268300 | -3.29126200 L |
| H | -1 | 1.48884000   | -9.02119600  | -2.40656600 L |
| H | -1 | 2.73852700   | -7.53537200  | -3.89287200 L |
| H | -1 | 5.20274200   | -7.37163200  | -3.72098100 L |
| H | -1 | 6.39827100   | -8.58457200  | -1.94975400 L |
| H | -1 | 4.19464100   | -15.50263200 | 2.89091000 L  |
| H | -1 | 6.22205300   | -12.10348500 | 4.54173900 L  |
| H | -1 | 9.57770200   | -13.38984900 | 8.78143100 L  |
| H | -1 | 10.73602600  | -15.33335300 | 9.76131700 L  |
| H | -1 | 9.85659600   | -17.62358500 | 9.39048300 L  |
| H | -1 | 7.80173800   | -17.95884300 | 8.06685000 L  |
| H | -1 | 5.68643600   | -16.42955400 | 9.56675300 L  |
| H | -1 | 3.87393100   | -17.82387400 | 10.47747800 L |
| H | -1 | 2.34458600   | -19.03128200 | 8.94990000 L  |
| H | -1 | 2.69176600   | -18.92353800 | 6.50606800 L  |
| C | -1 | -11.36385000 | -8.83548500  | -3.59820100 L |
| C | -1 | -11.02273800 | -8.28506700  | -4.83787600 L |
| C | -1 | -9.69024200  | -7.92154000  | -5.10304800 L |
| C | -1 | -8.69346900  | -8.20769500  | -4.14749300 L |
| C | -1 | -9.04707200  | -8.76979600  | -2.90783700 L |
| C | -1 | -10.39155700 | -9.04599100  | -2.61084000 L |
| C | -1 | -12.05903400 | -8.02804800  | -5.85161100 L |
| C | -1 | -7.06805700  | -6.77027900  | -5.45791800 L |
| C | -1 | -10.31105100 | -7.19264700  | -7.41373600 L |
| N | -1 | -9.36290900  | -7.17837600  | -6.30595500 L |
| C | -1 | -8.12775100  | -6.40473400  | -6.31829400 L |
| C | -1 | -11.65247700 | -7.57573600  | -7.18961100 L |
| C | -1 | -7.30746000  | -7.79130900  | -4.42205900 L |

|   |    |              |              |                |
|---|----|--------------|--------------|----------------|
| C | -1 | -5.84790200  | -6.07518700  | -5.50824900 L  |
| C | -1 | -5.70465200  | -4.96335100  | -6.33625700 L  |
| C | -1 | -6.78254800  | -4.52427400  | -7.10218400 L  |
| C | -1 | -7.99035000  | -5.22443200  | -7.08012400 L  |
| C | -1 | -9.91504100  | -6.90879300  | -8.73381900 L  |
| C | -1 | -10.83055400 | -6.94114300  | -9.78453600 L  |
| C | -1 | -12.15837500 | -7.27866800  | -9.54462200 L  |
| C | -1 | -12.57257400 | -7.58606800  | -8.25164500 L  |
| O | -1 | -13.23784900 | -8.21156500  | -5.59416900 L  |
| O | -1 | -6.38392400  | -8.23361100  | -3.75893000 L  |
| C | -1 | -10.81942400 | -9.45005000  | -1.24850900 L  |
| C | -1 | -10.27623700 | -8.83658500  | -0.11403200 L  |
| C | -1 | -10.83658100 | -9.04459700  | 1.15327700 L   |
| C | -1 | -11.96593300 | -9.87200100  | 1.30142100 L   |
| C | -1 | -12.41837100 | -10.59142400 | 0.17750200 L   |
| C | -1 | -11.86576900 | -10.36189600 | -1.07971500 L  |
| N | -1 | -12.73052400 | -9.89646100  | 2.52508500 L   |
| C | -1 | -12.12429900 | -9.60495700  | 3.80729200 L   |
| C | -1 | -14.16922200 | -10.03012900 | 2.41621500 L   |
| C | -1 | -14.73750300 | -10.87778300 | 1.44538200 L   |
| C | -1 | -16.12317000 | -10.99232500 | 1.33492300 L   |
| C | -1 | -16.95905000 | -10.28058200 | 2.19048900 L   |
| C | -1 | -16.41512500 | -9.41987300  | 3.14011300 L   |
| C | -1 | -15.03147400 | -9.27528800  | 3.23988500 L   |
| C | -1 | -12.70432300 | -10.10000000 | 4.99788800 L   |
| C | -1 | -12.25917900 | -9.66093400  | 6.24778900 L   |
| C | -1 | -11.19459600 | -8.77088100  | 6.33260100 L   |
| C | -1 | -10.56379200 | -8.33582500  | 5.17218100 L   |
| C | -1 | -11.00449700 | -8.75944500  | 3.91434700 L   |
| S | -1 | -13.73218200 | -11.81825500 | 0.28864800 L   |
| S | -1 | -10.07210200 | -8.14231100  | 2.50706500 L   |
| H | -1 | -12.40316800 | -9.04511200  | -3.38132800 L  |
| H | -1 | -8.28471200  | -8.94177900  | -2.15729300 L  |
| H | -1 | -5.01392000  | -6.37945600  | -4.89287900 L  |
| H | -1 | -4.76622200  | -4.42439000  | -6.36089400 L  |
| H | -1 | -6.68740400  | -3.63177100  | -7.70676700 L  |
| H | -1 | -8.82163800  | -4.81757900  | -7.63781100 L  |
| H | -1 | -8.89453700  | -6.68241900  | -8.96524100 L  |
| H | -1 | -10.50139900 | -6.72114800  | -10.78811000 L |
| H | -1 | -12.86207700 | -7.32439200  | -10.36306100 L |
| H | -1 | -13.60314100 | -7.86155500  | -8.08480000 L  |
| H | -1 | -9.45960600  | -8.13287000  | -0.21894500 L  |
| H | -1 | -12.28275100 | -10.87571300 | -1.93628700 L  |
| H | -1 | -16.55410300 | -11.62164600 | 0.56682000 L   |
| H | -1 | -18.02759800 | -10.38578700 | 2.09983200 L   |
| H | -1 | -17.06466900 | -8.85066600  | 3.78699100 L   |

|   |    |              |              |               |
|---|----|--------------|--------------|---------------|
| H | -1 | -14.63772100 | -8.56021700  | 3.94983800 L  |
| H | -1 | -13.53248300 | -10.79585000 | 4.95992900 L  |
| H | -1 | -12.74426600 | -10.00228500 | 7.15232600 L  |
| H | -1 | -10.84490700 | -8.42837400  | 7.29536600 L  |
| H | -1 | -9.71432700  | -7.67209000  | 5.25002000 L  |
| C | -1 | 1.72999000   | 12.64994300  | -0.92536800 L |
| C | -1 | 0.52642300   | 11.95914000  | -0.77262100 L |
| C | -1 | -0.66874200  | 12.51735200  | -1.24541500 L |
| C | -1 | -0.66771800  | 13.78855200  | -1.83431900 L |
| C | -1 | 0.54973700   | 14.46415600  | -2.02286200 L |
| C | -1 | 1.76080500   | 13.87799300  | -1.60394500 L |
| C | -1 | 0.50888300   | 10.54857300  | -0.36554100 L |
| C | -1 | -3.20864200  | 13.66337200  | -1.92938200 L |
| C | -1 | -1.67689600  | 10.28321100  | -1.47881300 L |
| N | -1 | -1.86164900  | 11.70607000  | -1.28950800 L |
| C | -1 | -3.14480000  | 12.36156700  | -1.39331100 L |
| C | -1 | -0.49850900  | 9.68079600   | -0.98936800 L |
| C | -1 | -1.94875300  | 14.31775400  | -2.34221600 L |
| C | -1 | -4.44685700  | 14.32016700  | -2.02750000 L |
| C | -1 | -5.61025600  | 13.69285000  | -1.57177000 L |
| C | -1 | -5.54647700  | 12.41026500  | -1.02040600 L |
| C | -1 | -4.31920800  | 11.74847000  | -0.92233200 L |
| C | -1 | -2.51327300  | 9.54887000   | -2.33481100 L |
| C | -1 | -2.17884300  | 8.24340700   | -2.68818000 L |
| C | -1 | -1.04000500  | 7.63588700   | -2.15847400 L |
| C | -1 | -0.19794700  | 8.35012900   | -1.30752600 L |
| O | -1 | 1.33711600   | 10.10349400  | 0.40540700 L  |
| O | -1 | -1.96534400  | 15.25947000  | -3.11195400 L |
| C | -1 | 3.05832400   | 14.45160200  | -2.03299000 L |
| C | -1 | 3.26507200   | 15.83431700  | -2.03234800 L |
| C | -1 | 4.41198200   | 16.38166600  | -2.61341400 L |
| C | -1 | 5.40237700   | 15.54268700  | -3.16613800 L |
| C | -1 | 5.24541500   | 14.14893200  | -3.06524300 L |
| C | -1 | 4.06761400   | 13.61555800  | -2.53523500 L |
| N | -1 | 6.51407300   | 16.10577300  | -3.88438600 L |
| C | -1 | 6.30153600   | 17.31194800  | -4.65132200 L |
| C | -1 | 7.80543200   | 15.45366900  | -3.86916500 L |
| C | -1 | 7.91766600   | 14.05571900  | -3.74622600 L |
| C | -1 | 9.18307700   | 13.44959500  | -3.75247700 L |
| C | -1 | 10.33980300  | 14.22298800  | -3.85260800 L |
| C | -1 | 10.23997700  | 15.60637000  | -3.97470600 L |
| C | -1 | 8.98443000   | 16.21495600  | -3.98733600 L |
| C | -1 | 6.92072600   | 17.48094900  | -5.90508200 L |
| C | -1 | 6.72160300   | 18.64768600  | -6.64658200 L |
| C | -1 | 5.90708300   | 19.65988100  | -6.14431400 L |
| C | -1 | 5.30556700   | 19.51388400  | -4.89496700 L |

|    |    |             |             |               |
|----|----|-------------|-------------|---------------|
| C  | -1 | 5.46380700  | 18.33261300 | -4.16551900 L |
| S- | -1 | 6.48133300  | 12.96928900 | -3.65068000 L |
| S- | -1 | 4.55822500  | 18.18128200 | -2.61241700 L |
| H  | -1 | 2.65382900  | 12.17819700 | -0.62209500 L |
| H  | -1 | 0.56110700  | 15.40254100 | -2.56457900 L |
| H  | -1 | -4.51002500 | 15.32445400 | -2.42858700 L |
| H  | -1 | -6.56070500 | 14.20719000 | -1.63198700 L |
| H  | -1 | -6.44842300 | 11.93141800 | -0.66081300 L |
| H  | -1 | -4.28252400 | 10.76586100 | -0.46905600 L |
| H  | -1 | -3.37458800 | 10.00773800 | -2.80039500 L |
| H  | -1 | -2.78900800 | 7.71721100  | -3.40167200 L |
| H  | -1 | -0.79549300 | 6.61845900  | -2.42821200 L |
| H  | -1 | 0.71590400  | 7.88857400  | -0.95505500 L |
| H  | -1 | 2.51318000  | 16.49381800 | -1.61608300 L |
| H  | -1 | 3.92916300  | 12.54067300 | -2.55057500 L |
| H  | -1 | 9.27306100  | 12.37326800 | -3.67344900 L |
| H  | -1 | 11.31209500 | 13.74920500 | -3.84050600 L |
| H  | -1 | 11.13431600 | 16.20930600 | -4.06483200 L |
| H  | -1 | 8.93022000  | 17.28543500 | -4.10156200 L |
| H  | -1 | 7.55938800  | 16.70644500 | -6.30510900 L |
| H  | -1 | 7.20116700  | 18.77015200 | -7.60860900 L |
| H  | -1 | 5.74429000  | 20.55969100 | -6.72142600 L |
| H  | -1 | 4.69686000  | 20.31262700 | -4.49759900 L |
| C  | -1 | -4.08194800 | 1.98324800  | 10.47375800 L |
| C  | -1 | -4.49026000 | 1.78944500  | 11.79774800 L |
| C  | -1 | -3.71783700 | 0.99144900  | 12.65845700 L |
| C  | -1 | -2.54350100 | 0.38462100  | 12.17644300 L |
| C  | -1 | -2.11686600 | 0.62744100  | 10.86316700 L |
| C  | -1 | -2.87447600 | 1.43580300  | 10.00588600 L |
| C  | -1 | -5.70369200 | 2.44023800  | 12.32360100 L |
| C  | -1 | -2.37295300 | -0.91591400 | 14.35327600 L |
| C  | -1 | -5.04440500 | 1.75614100  | 14.62100800 L |
| N  | -1 | -4.13939400 | 0.78570500  | 14.02634400 L |
| C  | -1 | -3.60571900 | -0.35417700 | 14.74923800 L |
| C  | -1 | -5.87493900 | 2.53478900  | 13.78266100 L |
| C  | -1 | -1.79788600 | -0.53443300 | 13.05204800 L |
| C  | -1 | -1.80267700 | -1.95747200 | 15.10318100 L |
| C  | -1 | -2.54115900 | -2.57468300 | 16.10971100 L |
| C  | -1 | -3.82837000 | -2.12664800 | 16.40457000 L |
| C  | -1 | -4.34655900 | -1.00112800 | 15.75516500 L |
| C  | -1 | -5.02457000 | 2.03878100  | 16.00215400 L |
| C  | -1 | -5.85791500 | 3.02690000  | 16.53694800 L |
| C  | -1 | -6.72316800 | 3.74018800  | 15.70668700 L |
| C  | -1 | -6.74259500 | 3.48989400  | 14.33643800 L |
| O  | -1 | -6.51606600 | 2.94904800  | 11.56799200 L |
| O  | -1 | -0.77757400 | -1.06798000 | 12.65118600 L |

|   |    |             |             |                |
|---|----|-------------|-------------|----------------|
| C | -1 | -2.39559900 | 1.75227500  | 8.63883100 L   |
| C | -1 | -1.70828500 | 0.81111400  | 7.85684100 L   |
| C | -1 | -1.32905100 | 1.11383300  | 6.54161200 L   |
| C | -1 | -1.68897700 | 2.35245000  | 5.97393200 L   |
| C | -1 | -2.27389400 | 3.32862500  | 6.80268500 L   |
| C | -1 | -2.61823700 | 3.02641900  | 8.11335600 L   |
| N | -1 | -1.56512000 | 2.59447600  | 4.55893000 L   |
| C | -1 | -0.47977600 | 2.00014400  | 3.80350300 L   |
| C | -1 | -2.58112800 | 3.41603200  | 3.92687500 L   |
| C | -1 | -3.15118200 | 4.51161600  | 4.60899600 L   |
| C | -1 | -4.19506700 | 5.24371200  | 4.03571000 L   |
| C | -1 | -4.68406900 | 4.89578000  | 2.78263100 L   |
| C | -1 | -4.08740200 | 3.86207000  | 2.07270100 L   |
| C | -1 | -3.06391500 | 3.11018600  | 2.64416000 L   |
| C | -1 | -0.02880600 | 2.59964900  | 2.60766300 L   |
| C | -1 | 1.10734000  | 2.12828000  | 1.95087900 L   |
| C | -1 | 1.80336900  | 1.03941400  | 2.46304200 L   |
| C | -1 | 1.32908100  | 0.37990500  | 3.59352100 L   |
| C | -1 | 0.19304900  | 0.84794700  | 4.26715800 L   |
| S | -1 | -2.59289400 | 5.00739200  | 6.23748400 L   |
| S | -1 | -0.39411400 | -0.14859200 | 5.65377500 L   |
| H | -1 | -4.69907100 | 2.57878300  | 9.81324100 L   |
| H | -1 | -1.18653400 | 0.19765700  | 10.51633300 L  |
| H | -1 | -0.83529500 | -2.36677000 | 14.83788200 L  |
| H | -1 | -2.13863900 | -3.44525200 | 16.60870800 L  |
| H | -1 | -4.42545100 | -2.65340700 | 17.13699100 L  |
| H | -1 | -5.34458500 | -0.66825800 | 16.00430300 L  |
| H | -1 | -4.33256500 | 1.53455700  | 16.66243900 L  |
| H | -1 | -5.81931500 | 3.25735500  | 17.59387100 L  |
| H | -1 | -7.34601100 | 4.52366100  | 16.11563700 L  |
| H | -1 | -7.38858200 | 4.08664300  | 13.70314900 L  |
| H | -1 | -1.48196900 | -0.16941200 | 8.25748800 L   |
| H | -1 | -3.08797700 | 3.78655500  | 8.71785200 L   |
| H | -1 | -4.63961900 | 6.07437900  | 4.56938400 L   |
| H | -1 | -5.51130700 | 5.43930900  | 2.35154900 L   |
| H | -1 | -4.39338900 | 3.66528300  | 1.05931700 L   |
| H | -1 | -2.63170600 | 2.31180500  | 2.06789100 L   |
| H | -1 | -0.49040300 | 3.50015300  | 2.22947100 L   |
| H | -1 | 1.46740300  | 2.63200600  | 1.06326800 L   |
| H | -1 | 2.70392900  | 0.69744700  | 1.97592000 L   |
| H | -1 | 1.85354700  | -0.49688000 | 3.95203200 L   |
| C | -1 | 9.92103100  | 3.89850700  | -10.38379200 L |
| C | -1 | 8.92111400  | 4.14425500  | -9.43693200 L  |
| C | -1 | 8.67898400  | 3.20475200  | -8.42253800 L  |
| C | -1 | 9.50658500  | 2.07418400  | -8.30309900 L  |
| C | -1 | 10.55528800 | 1.87469200  | -9.21131900 L  |

|   |    |             |             |                |
|---|----|-------------|-------------|----------------|
| C | -1 | 10.73703100 | 2.75516500  | -10.29196800 L |
| C | -1 | 8.09014600  | 5.36184700  | -9.50107800 L  |
| C | -1 | 7.80342100  | 1.04459100  | -6.74010700 L  |
| C | -1 | 6.98778400  | 4.69711000  | -7.37007900 L  |
| N | -1 | 7.54619100  | 3.36839500  | -7.54109400 L  |
| C | -1 | 6.97911900  | 2.17468900  | -6.93934900 L  |
| C | -1 | 7.19564700  | 5.67287600  | -8.37051000 L  |
| C | -1 | 9.17163100  | 1.05746700  | -7.29001500 L  |
| C | -1 | 7.28170600  | -0.10986500 | -6.13626200 L  |
| C | -1 | 5.93472100  | -0.16564500 | -5.78366800 L  |
| C | -1 | 5.09111400  | 0.90988200  | -6.06331700 L  |
| C | -1 | 5.60441700  | 2.07100100  | -6.64754800 L  |
| C | -1 | 6.27880400  | 5.05772400  | -6.20868500 L  |
| C | -1 | 5.68629800  | 6.31648800  | -6.10353800 L  |
| C | -1 | 5.80922600  | 7.23634800  | -7.14337000 L  |
| C | -1 | 6.57788200  | 6.92904100  | -8.26424400 L  |
| O | -1 | 8.16897200  | 6.11866400  | -10.45557000 L |
| O | -1 | 9.98543300  | 0.20847700  | -6.96424500 L  |
| C | -1 | 11.65425900 | 2.41377500  | -11.41032900 L |
| C | -1 | 11.81401900 | 1.07790200  | -11.81792500 L |
| C | -1 | 12.45392800 | 0.76700100  | -13.02036700 L |
| C | -1 | 12.85318800 | 1.80367000  | -13.87922700 L |
| C | -1 | 12.75570100 | 3.13729900  | -13.44792100 L |
| C | -1 | 12.22912100 | 3.42832200  | -12.19120100 L |
| N | -1 | 13.23387500 | 1.52295800  | -15.22876500 L |
| C | -1 | 13.97917000 | 0.33638000  | -15.53910200 L |
| C | -1 | 12.71570200 | 2.37049200  | -16.27281300 L |
| C | -1 | 12.62059200 | 3.75787300  | -16.06990500 L |
| C | -1 | 12.06236500 | 4.57295100  | -17.06059000 L |
| C | -1 | 11.54299500 | 4.01061400  | -18.22717200 L |
| C | -1 | 11.62287400 | 2.63241900  | -18.43209100 L |
| C | -1 | 12.21995400 | 1.81613400  | -17.46832200 L |
| C | -1 | 14.94110500 | 0.36502100  | -16.56200800 L |
| C | -1 | 15.59473500 | -0.80339700 | -16.94639200 L |
| C | -1 | 15.28013700 | -2.01480200 | -16.33046800 L |
| C | -1 | 14.36877000 | -2.04393600 | -15.27583700 L |
| C | -1 | 13.73766700 | -0.86779900 | -14.85404300 L |
| S | -1 | 13.17939500 | 4.52502600  | -14.53010000 L |
| S | -1 | 12.60077800 | -0.98608100 | -13.45477200 L |
| H | -1 | 10.01974400 | 4.57483100  | -11.22299300 L |
| H | -1 | 11.18414800 | 0.99861600  | -9.11204500 L  |
| H | -1 | 7.90505800  | -0.97948200 | -5.97015100 L  |
| H | -1 | 5.54536200  | -1.05170400 | -5.30817400 L  |
| H | -1 | 4.03943600  | 0.84805600  | -5.81688000 L  |
| H | -1 | 4.92225600  | 2.87616400  | -6.88333700 L  |
| H | -1 | 6.17392300  | 4.36934900  | -5.38486500 L  |

|   |    |             |             |                |
|---|----|-------------|-------------|----------------|
| H | -1 | 5.11648700  | 6.57074400  | -5.2223500 L   |
| H | -1 | 5.30807400  | 8.18818000  | -7.08312000 L  |
| H | -1 | 6.69655000  | 7.67438400  | -9.04087200 L  |
| H | -1 | 11.37867100 | 0.27015000  | -11.24510600 L |
| H | -1 | 12.17632200 | 4.46241200  | -11.87558400 L |
| H | -1 | 11.99688400 | 5.63983800  | -16.91076300 L |
| H | -1 | 11.08238500 | 4.64456700  | -18.97402100 L |
| H | -1 | 11.22156100 | 2.19655300  | -19.33782000 L |
| H | -1 | 12.25566300 | 0.74737400  | -17.63589600 L |
| H | -1 | 15.17920800 | 1.29364500  | -17.06408200 L |
| H | -1 | 16.33977600 | -0.76463900 | -17.72520200 L |
| H | -1 | 15.74907100 | -2.93042600 | -16.66042600 L |
| H | -1 | 14.15635700 | -2.98416600 | -14.78274400 L |
| C | 0  | 1.24292700  | -1.46600500 | 0.32931000 H   |
| C | 0  | 2.64923500  | -1.47568600 | 0.24333900 H   |
| C | 0  | 3.30158500  | -0.49808700 | -0.54706200 H  |
| C | 0  | 2.53884200  | 0.46175000  | -1.25453200 H  |
| C | 0  | 1.13255600  | 0.43134900  | -1.14900100 H  |
| C | 0  | 0.49009000  | -0.50523600 | -0.34049600 H  |
| C | 0  | 3.39154500  | -2.40260100 | 1.08828600 H   |
| C | 0  | 4.61957000  | 1.42747100  | -2.15381500 H  |
| C | 0  | 5.42402500  | -1.06437300 | 0.46724000 H   |
| N | 0  | 4.69270400  | -0.43843200 | -0.57505300 H  |
| C | 0  | 5.33027600  | 0.35925000  | -1.56034900 H  |
| C | 0  | 4.81913300  | -2.10257600 | 1.21385800 H   |
| C | 0  | 3.17186300  | 1.56009400  | -1.97952200 H  |
| C | 0  | 5.32008700  | 2.32589000  | -2.98351600 H  |
| C | 0  | 6.65540200  | 2.12984200  | -3.28067200 H  |
| C | 0  | 7.30397400  | 0.97706400  | -2.81911700 H  |
| C | 0  | 6.64169200  | 0.09359000  | -1.97826700 H  |
| C | 0  | 6.70091400  | -0.61418100 | 0.83893200 H   |
| C | 0  | 7.41800400  | -1.26483200 | 1.82986100 H   |
| C | 0  | 6.86972300  | -2.37266600 | 2.48515900 H   |
| C | 0  | 5.57959100  | -2.76657300 | 2.19617400 H   |
| O | 0  | 2.82738200  | -3.28838800 | 1.75565800 H   |
| O | 0  | 2.51484400  | 2.50033100  | -2.46494400 H  |
| C | 0  | -0.96023800 | -0.35881100 | -0.05102900 H  |
| C | 0  | -1.88691800 | 0.06690900  | -1.01272700 H  |
| C | 0  | -3.21269400 | 0.32330200  | -0.68161600 H  |
| C | 0  | -3.67882000 | 0.14797500  | 0.63902700 H   |
| C | 0  | -2.74917800 | -0.31252500 | 1.59740900 H   |
| C | 0  | -1.43066900 | -0.56365200 | 1.25025000 H   |
| N | 0  | -5.01687300 | 0.42462200  | 0.99159500 H   |
| C | 0  | -5.72923100 | 1.44591200  | 0.32208400 H   |
| C | 0  | -5.63143300 | -0.24283900 | 2.07707900 H   |
| C | 0  | -4.88618800 | -0.63717900 | 3.20582500 H   |

|   |    |              |             |               |
|---|----|--------------|-------------|---------------|
| C | 0  | -5.53779400  | -1.22376900 | 4.29583500 H  |
| C | 0  | -6.89066000  | -1.48942400 | 4.24335500 H  |
| C | 0  | -7.62772100  | -1.16492500 | 3.09797600 H  |
| C | 0  | -7.00634800  | -0.53927900 | 2.03499500 H  |
| C | 0  | -6.63504000  | 2.25039200  | 1.03895700 H  |
| C | 0  | -7.23792300  | 3.33363500  | 0.43377500 H  |
| C | 0  | -6.99732000  | 3.61900500  | -0.91333000 H |
| C | 0  | -6.10689200  | 2.83962100  | -1.63049200 H |
| C | 0  | -5.45704900  | 1.75870600  | -1.02449200 H |
| S | 0  | -3.15636100  | -0.41951700 | 3.30727100 H  |
| S | 0  | -4.32144100  | 0.80850100  | -1.97394000 H |
| H | 0  | 0.80371600   | -2.20998200 | 0.97803300 H  |
| H | 0  | 0.61102200   | 1.24329900  | -1.63077100 H |
| H | 0  | 4.75788400   | 3.15832000  | -3.38858800 H |
| H | 0  | 7.19451600   | 2.83226600  | -3.90487000 H |
| H | 0  | 8.32222800   | 0.76241200  | -3.12327500 H |
| H | 0  | 7.14668400   | -0.79677000 | -1.63008800 H |
| H | 0  | 7.12835300   | 0.25415000  | 0.36147500 H  |
| H | 0  | 8.40257300   | -0.90039300 | 2.10039900 H  |
| H | 0  | 7.45095200   | -2.88672100 | 3.23587700 H  |
| H | 0  | 5.09588500   | -3.57620800 | 2.72804600 H  |
| H | 0  | -1.55733600  | 0.21844300  | -2.03199800 H |
| H | 0  | -0.74145000  | -0.89782900 | 2.01303100 H  |
| H | 0  | -4.96334800  | -1.49188500 | 5.17224600 H  |
| H | 0  | -7.35518000  | -1.98142400 | 5.08345700 H  |
| H | 0  | -8.67955700  | -1.41322700 | 3.03405300 H  |
| H | 0  | -7.56915900  | -0.28165300 | 1.15155400 H  |
| H | 0  | -6.79254800  | 2.06619800  | 2.09228100 H  |
| H | 0  | -7.85363400  | 3.98832900  | 1.03220100 H  |
| H | 0  | -7.47565200  | 4.46753800  | -1.38561200 H |
| H | 0  | -5.86765400  | 3.09032900  | -2.65377100 H |
| C | -1 | -12.97389700 | 0.29330000  | 2.50987600 L  |
| C | -1 | -12.73016000 | -0.81196800 | 3.33711500 L  |
| C | -1 | -13.47166100 | -1.99543000 | 3.16139000 L  |
| C | -1 | -14.45399100 | -2.06695800 | 2.15884700 L  |
| C | -1 | -14.64129000 | -0.97893200 | 1.29240700 L  |
| C | -1 | -13.93200800 | 0.21764500  | 1.48877300 L  |
| C | -1 | -11.70714600 | -0.76546300 | 4.40053000 L  |
| C | -1 | -15.33874800 | -4.18414800 | 3.25978700 L  |
| C | -1 | -11.96170300 | -3.21794700 | 4.70374700 L  |
| N | -1 | -13.23957600 | -3.12723900 | 4.02822500 L  |
| C | -1 | -14.31438800 | -4.08142300 | 4.22753900 L  |
| C | -1 | -11.25393800 | -2.03539900 | 5.00036000 L  |
| C | -1 | -15.33600100 | -3.25215700 | 2.11115600 L  |
| C | -1 | -16.36917400 | -5.12458900 | 3.42953700 L  |
| C | -1 | -16.40076500 | -5.93459600 | 4.56597000 L  |



|   |    |              |             |               |
|---|----|--------------|-------------|---------------|
| C | -1 | -15.42335300 | -5.80075500 | 5.55004600 L  |
| C | -1 | -14.39688400 | -4.86884100 | 5.39394100 L  |
| C | -1 | -11.36617500 | -4.45914600 | 4.99642200 L  |
| C | -1 | -10.15819600 | -4.51150900 | 5.69337300 L  |
| C | -1 | -9.54753100  | -3.33711000 | 6.12696900 L  |
| C | -1 | -10.07842100 | -2.09901700 | 5.76178500 L  |
| O | -1 | -11.21017300 | 0.29623300  | 4.73999400 L  |
| O | -1 | -16.09019000 | -3.42728200 | 1.16804800 L  |
| C | -1 | -14.25291100 | 1.41425900  | 0.68289100 L  |
| C | -1 | -14.32476500 | 1.33296200  | -0.71125700 L |
| C | -1 | -14.64504600 | 2.45962900  | -1.47398400 L |
| C | -1 | -14.99896100 | 3.66574000  | -0.83560200 L |
| C | -1 | -14.94756400 | 3.74316700  | 0.56925400 L  |
| C | -1 | -14.53274900 | 2.63463400  | 1.31322200 L  |
| N | -1 | -15.42997600 | 4.79628900  | -1.60594000 L |
| C | -1 | -14.81419200 | 5.06248100  | -2.88092200 L |
| C | -1 | -16.47565800 | 5.65068600  | -1.09492800 L |
| C | -1 | -16.56448300 | 5.93224800  | 0.28106300 L  |
| C | -1 | -17.56772600 | 6.78945700  | 0.75508500 L  |
| C | -1 | -18.50548400 | 7.33803900  | -0.12250100 L |
| C | -1 | -18.43902000 | 7.04359400  | -1.48386900 L |
| C | -1 | -17.43019000 | 6.20976400  | -1.96899400 L |
| C | -1 | -14.59199600 | 6.38980200  | -3.29196800 L |
| C | -1 | -14.01604400 | 6.66113400  | -4.53143300 L |
| C | -1 | -13.66161100 | 5.61517500  | -5.38005800 L |
| C | -1 | -13.85005500 | 4.29341100  | -4.97562700 L |
| C | -1 | -14.41056600 | 4.00866500  | -3.72366600 L |
| S | -1 | -15.39572300 | 5.24558300  | 1.48039700 L  |
| S | -1 | -14.62242700 | 2.27022300  | -3.27423700 L |
| H | -1 | -12.40873000 | 1.20801000  | 2.64729600 L  |
| H | -1 | -15.38168200 | -1.04002100 | 0.50598200 L  |
| H | -1 | -17.15310300 | -5.22411300 | 2.69050100 L  |
| H | -1 | -17.19476600 | -6.65415700 | 4.69608100 L  |
| H | -1 | -15.46412000 | -6.41532000 | 6.44040000 L  |
| H | -1 | -13.68120000 | -4.75564400 | 6.19508700 L  |
| H | -1 | -11.82577500 | -5.38424000 | 4.67516200 L  |
| H | -1 | -9.69777100  | -5.46238500 | 5.91303600 L  |
| H | -1 | -8.63048200  | -3.38725400 | 6.69932900 L  |
| H | -1 | -9.53936200  | -1.19702500 | 6.01882000 L  |
| H | -1 | -14.10457800 | 0.39551300  | -1.20843900 L |
| H | -1 | -14.48549600 | 2.70877200  | 2.39319900 L  |
| H | -1 | -17.63282300 | 7.01732300  | 1.81046300 L  |
| H | -1 | -19.28721000 | 7.98643900  | 0.25303500 L  |
| H | -1 | -19.16882700 | 7.46125100  | -2.16557400 L |
| H | -1 | -17.40138500 | 5.99030000  | -3.02847600 L |
| H | -1 | -14.85816900 | 7.21735500  | -2.64758100 L |

|   |    |              |              |                |
|---|----|--------------|--------------|----------------|
| H | -1 | -13.84631200 | 7.68339700   | -4.83034600 L  |
| H | -1 | -13.23745500 | 5.82904100   | -6.34927000 L  |
| H | -1 | -13.54703600 | 3.48813200   | -5.63361800 L  |
| C | -1 | -6.69299100  | -11.98121200 | -3.43180300 L  |
| C | -1 | -6.50097700  | -12.91223400 | -2.40071900 L  |
| C | -1 | -7.05634000  | -14.20313300 | -2.50256400 L  |
| C | -1 | -7.84337700  | -14.52995000 | -3.62413100 L  |
| C | -1 | -7.99366600  | -13.60231300 | -4.66931000 L  |
| C | -1 | -7.40990600  | -12.32776000 | -4.58759400 L  |
| C | -1 | -5.72428100  | -12.55637700 | -1.19905800 L  |
| C | -1 | -8.55957500  | -16.67075500 | -2.44828000 L  |
| C | -1 | -5.79136800  | -14.93553500 | -0.48030100 L  |
| N | -1 | -6.87031100  | -15.16270000 | -1.43059300 L  |
| C | -1 | -7.80066400  | -16.27829400 | -1.32245500 L  |
| C | -1 | -5.29601700  | -13.62771500 | -0.28355100 L  |
| C | -1 | -8.54770200  | -15.82615400 | -3.65627300 L  |
| C | -1 | -9.40734100  | -17.79012900 | -2.37079100 L  |
| C | -1 | -9.55999800  | -18.47459700 | -1.16676300 L  |
| C | -1 | -8.91212600  | -18.01890900 | -0.02200200 L  |
| C | -1 | -8.05388300  | -16.92024300 | -0.09059300 L  |
| C | -1 | -5.17426200  | -15.99668300 | 0.21187100 L   |
| C | -1 | -4.21469000  | -15.74272000 | 1.19411600 L   |
| C | -1 | -3.81296900  | -14.43477600 | 1.46065900 L   |
| C | -1 | -4.33537100  | -13.37994500 | 0.71260200 L   |
| O | -1 | -5.40371600  | -11.39799000 | -0.98938100 L  |
| O | -1 | -9.17880600  | -16.16058400 | -4.64576900 L  |
| C | -1 | -7.49157800  | -11.38638200 | -5.73482100 L  |
| C | -1 | -8.65537900  | -11.27645800 | -6.50654200 L  |
| C | -1 | -8.66331900  | -10.51660500 | -7.68326200 L  |
| C | -1 | -7.50770900  | -9.81363700  | -8.08929000 L  |
| C | -1 | -6.40551100  | -9.79161300  | -7.21714600 L  |
| C | -1 | -6.38213500  | -10.61166800 | -6.08730100 L  |
| N | -1 | -7.44338100  | -9.18743100  | -9.38859300 L  |
| C | -1 | -8.23472100  | -9.74473200  | -10.46674900 L |
| C | -1 | -6.62508400  | -8.00815600  | -9.61659100 L  |
| C | -1 | -5.50222000  | -7.71787600  | -8.81591800 L  |
| C | -1 | -4.70936900  | -6.59488400  | -9.08313800 L  |
| C | -1 | -5.05112900  | -5.71397100  | -10.10119800 L |
| C | -1 | -6.18333700  | -5.95432000  | -10.86687800 L |
| C | -1 | -6.96109700  | -7.08783500  | -10.63701900 L |
| C | -1 | -7.73199700  | -9.78865100  | -11.78491200 L |
| C | -1 | -8.56254200  | -10.14784900 | -12.85029500 L |
| C | -1 | -9.90218300  | -10.45457800 | -12.61714500 L |
| C | -1 | -10.38872300 | -10.48609300 | -11.31321400 L |
| C | -1 | -9.54986900  | -10.18888700 | -10.23483800 L |
| S | -1 | -4.98950500  | -8.70935900  | -7.41704200 L  |

|   |    |              |              |                |
|---|----|--------------|--------------|----------------|
| S | -1 | -10.22561600 | -10.40977600 | -8.58004000 L  |
| H | -1 | -6.27473900  | -10.98691800 | -3.33660800 L  |
| H | -1 | -8.55856800  | -13.87687900 | -5.55166600 L  |
| H | -1 | -9.97859200  | -18.11506100 | -3.23146300 L  |
| H | -1 | -10.22030400 | -19.32974500 | -1.10954200 L  |
| H | -1 | -9.08571900  | -18.51118000 | 0.92508000 L   |
| H | -1 | -7.61778300  | -16.55978600 | 0.82980200 L   |
| H | -1 | -5.42957400  | -17.02302800 | -0.00503600 L  |
| H | -1 | -3.77917100  | -16.56257400 | 1.74612500 L   |
| H | -1 | -3.06450100  | -14.24209200 | 2.21792500 L   |
| H | -1 | -3.96440000  | -12.37748700 | 0.88915300 L   |
| H | -1 | -9.55538100  | -11.80035000 | -6.20823300 L  |
| H | -1 | -5.48317500  | -10.64557900 | -5.48436100 L  |
| H | -1 | -3.83366100  | -6.38879000  | -8.47976800 L  |
| H | -1 | -4.44994700  | -4.83371600  | -10.28261000 L |
| H | -1 | -6.45978300  | -5.25437400  | -11.63369300 L |
| H | -1 | -7.84852100  | -7.22087000  | -11.23939800 L |
| H | -1 | -6.70767000  | -9.50724300  | -11.99264300 L |
| H | -1 | -8.17723000  | -10.15951100 | -13.86019500 L |
| H | -1 | -10.56569000 | -10.67251000 | -13.44273400 L |
| H | -1 | -11.41961200 | -10.75627700 | -11.13769000 L |
| C | -1 | 5.21285500   | 4.03318600   | 8.87606900 L   |
| C | -1 | 4.53060000   | 3.43273100   | 9.94193100 L   |
| C | -1 | 3.59152200   | 4.16232600   | 10.67971200 L  |
| C | -1 | 3.27209900   | 5.47347800   | 10.27502000 L  |
| C | -1 | 3.90278200   | 6.04013200   | 9.15029400 L   |
| C | -1 | 4.87769000   | 5.32353600   | 8.42608100 L   |
| C | -1 | 4.69995800   | 1.99696100   | 10.21518700 L  |
| C | -1 | 1.81954700   | 5.70883600   | 12.34560200 L  |
| C | -1 | 2.92311300   | 2.10891500   | 11.95503000 L  |
| N | -1 | 2.92755100   | 3.56321700   | 11.82172300 L  |
| C | -1 | 2.28121300   | 4.44609000   | 12.77538000 L  |
| C | -1 | 3.85331500   | 1.33897600   | 11.22453400 L  |
| C | -1 | 2.22917400   | 6.20122200   | 11.01951900 L  |
| C | -1 | 1.06660500   | 6.51342000   | 13.21437300 L  |
| C | -1 | 0.85019700   | 6.11390200   | 14.53297600 L  |
| C | -1 | 1.40450400   | 4.92017900   | 14.99541200 L  |
| C | -1 | 2.14820800   | 4.11090500   | 14.13720100 L  |
| C | -1 | 1.97336700   | 1.43047000   | 12.75081400 L  |
| C | -1 | 2.06131100   | 0.05043100   | 12.94413500 L  |
| C | -1 | 3.01169100   | -0.69511300  | 12.25417000 L  |
| C | -1 | 3.89834700   | -0.05864400  | 11.39007200 L  |
| O | -1 | 5.45526400   | 1.33691500   | 9.52653000 L   |
| O | -1 | 1.73148300   | 7.21455300   | 10.55608400 L  |
| C | -1 | 5.41666300   | 5.83653400   | 7.11997600 L   |
| C | -1 | 5.43245500   | 7.20570000   | 6.81141500 L   |

|   |    |             |             |               |
|---|----|-------------|-------------|---------------|
| C | -1 | 5.69315100  | 7.64890100  | 5.50596900 L  |
| C | -1 | 5.92804900  | 6.71831800  | 4.46987300 L  |
| C | -1 | 6.02830300  | 5.35561100  | 4.79981800 L  |
| C | -1 | 5.81165800  | 4.93932300  | 6.11334200 L  |
| N | -1 | 6.04399700  | 7.15981600  | 3.10588800 L  |
| C | -1 | 5.30673600  | 8.32646500  | 2.68183900 L  |
| C | -1 | 6.76892100  | 6.39190400  | 2.11816200 L  |
| C | -1 | 6.76388400  | 4.98777400  | 2.14248500 L  |
| C | -1 | 7.14365700  | 4.26953200  | 1.00017800 L  |
| C | -1 | 7.57986500  | 4.93688500  | -0.14410000 L |
| C | -1 | 7.73388900  | 6.32178800  | -0.11961700 L |
| C | -1 | 7.35903000  | 7.04414500  | 1.01374300 L  |
| C | -1 | 4.72307300  | 8.37293100  | 1.39817300 L  |
| C | -1 | 4.20505600  | 9.56399400  | 0.89832500 L  |
| C | -1 | 4.19282500  | 10.70523300 | 1.69937800 L  |
| C | -1 | 4.68301900  | 10.64933100 | 3.00395100 L  |
| C | -1 | 5.21623900  | 9.45779900  | 3.50946800 L  |
| S | -1 | 6.28806500  | 4.03115600  | 3.58969600 L  |
| S | -1 | 5.74871300  | 9.43877400  | 5.23317200 L  |
| H | -1 | 5.97476700  | 3.45936300  | 8.37245000 L  |
| H | -1 | 3.59352900  | 7.02280900  | 8.82268000 L  |
| H | -1 | 0.66552500  | 7.45707700  | 12.87523100 L |
| H | -1 | 0.28003900  | 6.74329300  | 15.20397600 L |
| H | -1 | 1.26201400  | 4.61796300  | 16.02139300 L |
| H | -1 | 2.60415300  | 3.21641000  | 14.54118800 L |
| H | -1 | 1.15644200  | 1.95043300  | 13.22809800 L |
| H | -1 | 1.39387700  | -0.44198100 | 13.63692100 L |
| H | -1 | 3.04591100  | -1.77084700 | 12.37140000 L |
| H | -1 | 4.60872800  | -0.66135200 | 10.84183700 L |
| H | -1 | 5.21298800  | 7.93692500  | 7.57583000 L  |
| H | -1 | 5.84036200  | 3.87739500  | 6.29555800 L  |
| H | -1 | 7.09521300  | 3.18813200  | 0.99533500 L  |
| H | -1 | 7.84898400  | 4.37558200  | -1.03075800 L |
| H | -1 | 8.13654300  | 6.83723300  | -0.98102800 L |
| H | -1 | 7.45567000  | 8.12365900  | 1.00088800 L  |
| H | -1 | 4.70065000  | 7.49272500  | 0.76794700 L  |
| H | -1 | 3.81549300  | 9.59730800  | -0.11134600 L |
| H | -1 | 3.78837500  | 11.63068900 | 1.31979000 L  |
| H | -1 | 4.64208100  | 11.53574200 | 3.62452000 L  |
| C | -1 | 8.74177000  | 9.47239700  | -7.53117500 L |
| C | -1 | 9.72984800  | 9.24720000  | -8.50599700 L |
| C | -1 | 9.91331700  | 10.18544300 | -9.53743200 L |
| C | -1 | 9.18291400  | 11.38682100 | -9.52783000 L |
| C | -1 | 8.23913000  | 11.62525300 | -8.52267900 L |
| C | -1 | 7.95096500  | 10.63530400 | -7.56897300 L |
| C | -1 | 10.53104600 | 8.00369900  | -8.52243200 L |

|   |    |             |             |                |
|---|----|-------------|-------------|----------------|
| C | -1 | 9.74840800  | 11.70916600 | -11.96587400 L |
| C | -1 | 11.79120300 | 8.85672800  | -10.49648800 L |
| N | -1 | 10.77289000 | 9.87609400  | -10.65960000 L |
| C | -1 | 10.45800100 | 10.48836800 | -11.94055800 L |
| C | -1 | 11.63430600 | 7.86932000  | -9.49933400 L  |
| C | -1 | 9.28525800  | 12.28212800 | -10.69197700 L |
| C | -1 | 9.35486800  | 12.27375800 | -13.18922100 L |
| C | -1 | 9.66605100  | 11.63677300 | -14.38921300 L |
| C | -1 | 10.32949600 | 10.41139400 | -14.37465500 L |
| C | -1 | 10.70647100 | 9.82800000  | -13.16069600 L |
| C | -1 | 12.96254800 | 8.85564300  | -11.27925500 L |
| C | -1 | 13.89098900 | 7.81764900  | -11.16341000 L |
| C | -1 | 13.67685300 | 6.78490200  | -10.24958200 L |
| C | -1 | 12.56248700 | 6.81602300  | -9.40749600 L  |
| O | -1 | 10.31184200 | 7.11684300  | -7.71334000 L  |
| O | -1 | 8.92950000  | 13.44652300 | -10.62180900 L |
| C | -1 | 6.68015800  | 10.69720300 | -6.80305600 L  |
| C | -1 | 5.51062700  | 11.10843300 | -7.45924000 L  |
| C | -1 | 4.25869400  | 10.96032700 | -6.86582300 L  |
| C | -1 | 4.14952700  | 10.36227900 | -5.59921800 L  |
| C | -1 | 5.32357200  | 10.01081600 | -4.90080700 L  |
| C | -1 | 6.57964500  | 10.18939200 | -5.49904100 L  |
| N | -1 | 2.86440900  | 9.99723300  | -5.07502700 L  |
| C | -1 | 1.69834000  | 10.79857400 | -5.35876500 L  |
| C | -1 | 2.74630400  | 8.74168700  | -4.37507900 L  |
| C | -1 | 3.74549700  | 8.33506400  | -3.47161100 L  |
| C | -1 | 3.60790500  | 7.12904300  | -2.77194100 L  |
| C | -1 | 2.52346400  | 6.28739200  | -3.02691000 L  |
| C | -1 | 1.56824300  | 6.64950300  | -3.97737400 L  |
| C | -1 | 1.66590400  | 7.87758900  | -4.63523000 L  |
| C | -1 | 0.65335600  | 10.88678500 | -4.41857200 L  |
| C | -1 | -0.51151900 | 11.60056600 | -4.71428300 L  |
| C | -1 | -0.64577400 | 12.24211800 | -5.94273300 L  |
| C | -1 | 0.38764300  | 12.17519000 | -6.87406600 L  |
| C | -1 | 1.56467400  | 11.47561100 | -6.58502600 L  |
| S | -1 | 5.26129900  | 9.29402600  | -3.23596900 L  |
| S | -1 | 2.83311000  | 11.44580800 | -7.86486200 L  |
| H | -1 | 8.52761700  | 8.70021800  | -6.80320500 L  |
| H | -1 | 7.64337300  | 12.52996400 | -8.55687300 L  |
| H | -1 | 8.74523400  | 13.16645300 | -13.21278000 L |
| H | -1 | 9.35089800  | 12.06966200 | -15.32986000 L |
| H | -1 | 10.51544200 | 9.89809200  | -15.30727300 L |
| H | -1 | 11.14600700 | 8.84160800  | -13.17729600 L |
| H | -1 | 13.16007600 | 9.65743400  | -11.97869500 L |
| H | -1 | 14.77903600 | 7.81514000  | -11.78158000 L |
| H | -1 | 14.39150600 | 5.97523400  | -10.17257000 L |

|   |    |             |              |                |
|---|----|-------------|--------------|----------------|
| H | -1 | 12.44110500 | 6.03339000   | -8.66862800 L  |
| H | -1 | 5.55614600  | 11.47698800  | -8.47665100 L  |
| H | -1 | 7.47103800  | 9.88053900   | -4.96701700 L  |
| H | -1 | 4.36768900  | 6.81929800   | -2.06487100 L  |
| H | -1 | 2.43434600  | 5.34521100   | -2.50260300 L  |
| H | -1 | 0.74597200  | 5.98139600   | -4.19944800 L  |
| H | -1 | 0.91207800  | 8.14395400   | -5.36487300 L  |
| H | -1 | 0.73935200  | 10.39330200  | -3.46106600 L  |
| H | -1 | -1.31779800 | 11.65122300  | -3.99885700 L  |
| H | -1 | -1.55137900 | 12.78774300  | -6.17601600 L  |
| H | -1 | 0.27352700  | 12.66849100  | -7.82728300 L  |
| C | -1 | -2.54660200 | -12.61899700 | -6.55623900 L  |
| C | -1 | -3.03442200 | -13.66264000 | -7.35663400 L  |
| C | -1 | -3.58086100 | -13.38068900 | -8.62449600 L  |
| C | -1 | -3.58240700 | -12.05397900 | -9.09176100 L  |
| C | -1 | -3.02140000 | -11.03805900 | -8.31281900 L  |
| C | -1 | -2.57290900 | -11.29105900 | -7.00809500 L  |
| C | -1 | -2.95380300 | -15.06076000 | -6.89715000 L  |
| C | -1 | -4.85437900 | -12.80125600 | -11.15486400 L |
| C | -1 | -3.67325900 | -15.81845000 | -9.15175000 L  |
| N | -1 | -4.06857700 | -14.45239200 | -9.46995300 L  |
| C | -1 | -4.89093500 | -14.11144100 | -10.62521000 L |
| C | -1 | -3.28591900 | -16.14657000 | -7.83509100 L  |
| C | -1 | -4.13567400 | -11.75039300 | -10.42345200 L |
| C | -1 | -5.49607400 | -12.51140000 | -12.37229200 L |
| C | -1 | -6.16100100 | -13.51674600 | -13.06845600 L |
| C | -1 | -6.26273900 | -14.79112400 | -12.51328500 L |
| C | -1 | -5.71260600 | -15.06143600 | -11.26215900 L |
| C | -1 | -3.57556400 | -16.82280300 | -10.13828100 L |
| C | -1 | -3.36379600 | -18.15505700 | -9.77783500 L  |
| C | -1 | -3.18796500 | -18.49495800 | -8.43771100 L  |
| C | -1 | -3.10377100 | -17.49302600 | -7.47198700 L  |
| O | -1 | -2.53317400 | -15.31896300 | -5.78075800 L  |
| O | -1 | -4.00497100 | -10.63885400 | -10.91109800 L |
| C | -1 | -2.27907300 | -10.16242600 | -6.07985900 L  |
| C | -1 | -1.81228200 | -8.92579000  | -6.55861700 L  |
| C | -1 | -1.75758200 | -7.80227700  | -5.72526800 L  |
| C | -1 | -2.14260400 | -7.91249100  | -4.37798800 L  |
| C | -1 | -2.53689900 | -9.16460000  | -3.87468900 L  |
| C | -1 | -2.62102000 | -10.26657200 | -4.72288000 L  |
| N | -1 | -2.22281700 | -6.75314000  | -3.53983800 L  |
| C | -1 | -1.31367500 | -5.65118700  | -3.71853800 L  |
| C | -1 | -3.31363200 | -6.66146800  | -2.60038300 L  |
| C | -1 | -3.72558500 | -7.79360300  | -1.87475200 L  |
| C | -1 | -4.78260900 | -7.69711200  | -0.96250200 L  |
| C | -1 | -5.50190900 | -6.50844900  | -0.84784200 L  |

|    |    |             |              |                |
|----|----|-------------|--------------|----------------|
| C  | -1 | -5.14874000 | -5.40304500  | -1.62385500 L  |
| C  | -1 | -4.03649600 | -5.46283000  | -2.46294800 L  |
| C  | -1 | -0.90919600 | -4.89394200  | -2.60617700 L  |
| C  | -1 | -0.14659200 | -3.73649900  | -2.76975600 L  |
| C  | -1 | 0.24487600  | -3.33835100  | -4.04552800 L  |
| C  | -1 | -0.09553500 | -4.11723700  | -5.15394800 L  |
| C  | -1 | -0.85816600 | -5.28414000  | -4.99728000 L  |
| S- | -1 | -2.96851900 | -9.40992900  | -2.13298000 L  |
| S- | -1 | -1.25888200 | -6.23273900  | -6.48533500 L  |
| H  | -1 | -2.14198800 | -12.84578000 | -5.58022100 L  |
| H  | -1 | -2.99860500 | -10.03673300 | -8.71416100 L  |
| H  | -1 | -5.45828500 | -11.51719900 | -12.79916900 L |
| H  | -1 | -6.60251000 | -13.30479000 | -14.03424500 L |
| H  | -1 | -6.74755200 | -15.58546200 | -13.06003700 L |
| H  | -1 | -5.89509600 | -16.03357000 | -10.82707800 L |
| H  | -1 | -3.65866400 | -16.58568400 | -11.18931600 L |
| H  | -1 | -3.34170100 | -18.92457400 | -10.53883300 L |
| H  | -1 | -3.06361800 | -19.53026100 | -8.15480700 L  |
| H  | -1 | -2.86827500 | -17.76719700 | -6.45085800 L  |
| H  | -1 | -1.51527800 | -8.81518100  | -7.59328300 L  |
| H  | -1 | -3.03254000 | -11.18526700 | -4.32617500 L  |
| H  | -1 | -5.08383000 | -8.55982200  | -0.38139700 L  |
| H  | -1 | -6.34711300 | -6.45728500  | -0.17601300 L  |
| H  | -1 | -5.73439000 | -4.49655600  | -1.58087000 L  |
| H  | -1 | -3.77019100 | -4.58959200  | -3.04416800 L  |
| H  | -1 | -1.19128800 | -5.20876900  | -1.61289300 L  |
| H  | -1 | 0.15297000  | -3.15670500  | -1.90670000 L  |
| H  | -1 | 0.83223700  | -2.43899900  | -4.17063400 L  |
| H  | -1 | 0.23744800  | -3.81240600  | -6.13798800 L  |
| C  | -1 | 7.59032500  | 2.59556800   | -12.65647100 L |
| C  | -1 | 8.28032300  | 1.40382600   | -12.91983000 L |
| C  | -1 | 8.10571500  | 0.29495600   | -12.07753300 L |
| C  | -1 | 7.22804900  | 0.37941800   | -10.98698000 L |
| C  | -1 | 6.45947200  | 1.53290700   | -10.79780100 L |
| C  | -1 | 6.62026300  | 2.65520800   | -11.63440800 L |
| C  | -1 | 9.10890000  | 1.24672600   | -14.12988200 L |
| C  | -1 | 8.17413200  | -1.80465800  | -10.12119100 L |
| C  | -1 | 9.20481800  | -1.20548700  | -13.72316000 L |
| N  | -1 | 8.79696700  | -0.94430600  | -12.35407900 L |
| C  | -1 | 9.02050600  | -1.86333400  | -11.25153300 L |
| C  | -1 | 9.41032400  | -0.11828400  | -14.60212200 L |
| C  | -1 | 7.13318200  | -0.76356300  | -10.06161500 L |
| C  | -1 | 8.38691300  | -2.66619700  | -9.03454000 L  |
| C  | -1 | 9.45590200  | -3.55933300  | -9.04989900 L  |
| C  | -1 | 10.32305100 | -3.59849000  | -10.14152900 L |
| C  | -1 | 10.11767700 | -2.74784300  | -11.23094400 L |

|    |    |             |             |                |
|----|----|-------------|-------------|----------------|
| C  | -1 | 9.32012100  | -2.51609600 | -14.22742500 L |
| C  | -1 | 9.73619300  | -2.73525400 | -15.54418400 L |
| C  | -1 | 9.99757500  | -1.65453400 | -16.38730700 L |
| C  | -1 | 9.81391100  | -0.35058400 | -15.92682000 L |
| O  | -1 | 9.49306000  | 2.22091000  | -14.75545000 L |
| O  | -1 | 6.23849600  | -0.82476500 | -9.23403200 L  |
| C  | -1 | 5.71342900  | 3.83856700  | -11.50323000 L |
| C  | -1 | 5.06548000  | 4.12703700  | -10.28746600 L |
| C  | -1 | 4.16862800  | 5.19178000  | -10.17826300 L |
| C  | -1 | 3.97093200  | 6.04884500  | -11.27098900 L |
| C  | -1 | 4.60227600  | 5.77044100  | -12.49491300 L |
| C  | -1 | 5.42760600  | 4.65234900  | -12.61564200 L |
| N  | -1 | 3.17021300  | 7.22537800  | -11.13287600 L |
| C  | -1 | 1.98734000  | 7.20086600  | -10.31462200 L |
| C  | -1 | 3.60289800  | 8.43265600  | -11.78561200 L |
| C  | -1 | 4.15595900  | 8.38308800  | -13.07771700 L |
| C  | -1 | 4.56827000  | 9.56547900  | -13.70585600 L |
| C  | -1 | 4.49109600  | 10.78614200 | -13.03038600 L |
| C  | -1 | 3.99442500  | 10.83091100 | -11.72671500 L |
| C  | -1 | 3.53422900  | 9.66408700  | -11.11380500 L |
| C  | -1 | 0.84200100  | 7.91201100  | -10.71321700 L |
| C  | -1 | -0.30602600 | 7.90843300  | -9.91821600 L  |
| C  | -1 | -0.31223300 | 7.22384800  | -8.70377500 L  |
| C  | -1 | 0.81301800  | 6.49959300  | -8.30689200 L  |
| C  | -1 | 1.95136100  | 6.45390200  | -9.12330600 L  |
| S- | -1 | 4.36820300  | 6.81602600  | -13.95921400 L |
| S- | -1 | 3.33760900  | 5.42568700  | -8.58212700 L  |
| H  | -1 | 7.77698000  | 3.45319400  | -13.28659200 L |
| H  | -1 | 5.71571600  | 1.52669000  | -10.01525500 L |
| H  | -1 | 7.75097000  | -2.62144300 | -8.15901600 L  |
| H  | -1 | 9.62850800  | -4.19655400 | -8.19801000 L  |
| H  | -1 | 11.16548000 | -4.27859500 | -10.13641400 L |
| H  | -1 | 10.82994200 | -2.77229600 | -12.04150000 L |
| H  | -1 | 9.07475700  | -3.37133700 | -13.61307900 L |
| H  | -1 | 9.84394700  | -3.74592900 | -15.91600600 L |
| H  | -1 | 10.31175500 | -1.82755400 | -17.40881500 L |
| H  | -1 | 9.95062600  | 0.47352300  | -16.61316100 L |
| H  | -1 | 5.25735200  | 3.53954000  | -9.40296200 L  |
| H  | -1 | 5.84097900  | 4.43266500  | -13.58949000 L |
| H  | -1 | 4.98009000  | 9.53451100  | -14.70678700 L |
| H  | -1 | 4.82779800  | 11.69490100 | -13.51264000 L |
| H  | -1 | 3.95578200  | 11.77165200 | -11.19305700 L |
| H  | -1 | 3.14412900  | 9.71130500  | -10.10745500 L |
| H  | -1 | 0.83490700  | 8.44948400  | -11.65257300 L |
| H  | -1 | -1.19296100 | 8.43411900  | -10.24349900 L |
| H  | -1 | -1.19549200 | 7.23979700  | -8.07850200 L  |



|   |    |              |             |                |
|---|----|--------------|-------------|----------------|
| H | -1 | 0.78761600   | 5.94950300  | -7.37454900 L  |
| C | -1 | -6.53820400  | 6.68246500  | -3.57142100 L  |
| C | -1 | -5.40282800  | 6.31908200  | -2.83557300 L  |
| C | -1 | -5.29868500  | 6.65910900  | -1.47674200 L  |
| C | -1 | -6.37204800  | 7.33302900  | -0.86055200 L  |
| C | -1 | -7.52140200  | 7.66973700  | -1.59903400 L  |
| C | -1 | -7.60474400  | 7.36701300  | -2.96628300 L  |
| C | -1 | -4.29974900  | 5.59255900  | -3.47370300 L  |
| C | -1 | -4.89728400  | 7.76910100  | 1.14457300 L   |
| C | -1 | -3.19742500  | 5.31266800  | -1.26073600 L  |
| N | -1 | -4.08668100  | 6.34996900  | -0.72966700 L  |
| C | -1 | -3.82286900  | 7.12559200  | 0.48126600 L   |
| C | -1 | -3.29073600  | 4.94883900  | -2.62552400 L  |
| C | -1 | -6.23830900  | 7.73686400  | 0.54235300 L   |
| C | -1 | -4.67545700  | 8.48795100  | 2.33098200 L   |
| C | -1 | -3.38642400  | 8.62280200  | 2.83938100 L   |
| C | -1 | -2.30801800  | 8.06442200  | 2.15677000 L   |
| C | -1 | -2.51931200  | 7.33417900  | 0.98346900 L   |
| C | -1 | -2.26351300  | 4.61745200  | -0.45875500 L  |
| C | -1 | -1.43139900  | 3.63635200  | -1.00725400 L  |
| C | -1 | -1.50924200  | 3.32820700  | -2.36295500 L  |
| C | -1 | -2.43928300  | 3.97332900  | -3.16795400 L  |
| O | -1 | -4.20425200  | 5.55062000  | -4.68866600 L  |
| O | -1 | -7.21613000  | 8.08762200  | 1.18133900 L   |
| C | -1 | -8.76712200  | 7.80616800  | -3.78774700 L  |
| C | -1 | -9.34575700  | 9.07542300  | -3.61142500 L  |
| C | -1 | -10.36102400 | 9.52530800  | -4.46980000 L  |
| C | -1 | -10.78021200 | 8.72438200  | -5.54439100 L  |
| C | -1 | -10.18629200 | 7.46793200  | -5.73752300 L  |
| C | -1 | -9.23133600  | 6.99727100  | -4.83498100 L  |
| N | -1 | -11.76452700 | 9.20831200  | -6.47026900 L  |
| C | -1 | -12.84795900 | 10.02896700 | -5.99520000 L  |
| C | -1 | -11.57775000 | 8.96666700  | -7.87763400 L  |
| C | -1 | -10.99765300 | 7.76467100  | -8.32023100 L  |
| C | -1 | -10.77533800 | 7.55587300  | -9.68570500 L  |
| C | -1 | -11.12470500 | 8.53615100  | -10.61363100 L |
| C | -1 | -11.72977300 | 9.71701300  | -10.18649900 L |
| C | -1 | -11.93310200 | 9.94582700  | -8.82558300 L  |
| C | -1 | -14.13834300 | 9.89611000  | -6.54194100 L  |
| C | -1 | -15.17387800 | 10.73661000 | -6.12383400 L  |
| C | -1 | -14.93140300 | 11.71282000 | -5.15548700 L  |
| C | -1 | -13.65798800 | 11.83974800 | -4.59557400 L  |
| C | -1 | -12.62122700 | 10.98806900 | -4.99678900 L  |
| S | -1 | -10.55945600 | 6.43880000  | -7.17522700 L  |
| S | -1 | -10.99252900 | 11.20723100 | -4.24753600 L  |
| H | -1 | -6.57814000  | 6.44686500  | -4.62622300 L  |

|   |    |              |             |                |
|---|----|--------------|-------------|----------------|
| H | -1 | -8.33825400  | 8.19047600  | -1.11447900 L  |
| H | -1 | -5.49662400  | 8.97099200  | 2.84780300 L   |
| H | -1 | -3.22241900  | 9.18456200  | 3.74970400 L   |
| H | -1 | -1.30268200  | 8.21077300  | 2.53142500 L   |
| H | -1 | -1.65132100  | 6.95821500  | 0.47110900 L   |
| H | -1 | -2.16981900  | 4.80676900  | 0.59530700 L   |
| H | -1 | -0.72744800  | 3.10926000  | -0.37776100 L  |
| H | -1 | -0.85895900  | 2.58206100  | -2.79738300 L  |
| H | -1 | -2.50845300  | 3.69447400  | -4.21205600 L  |
| H | -1 | -8.98421500  | 9.73490300  | -2.83236200 L  |
| H | -1 | -8.80994600  | 6.01353100  | -4.98775400 L  |
| H | -1 | -10.34117800 | 6.62659200  | -10.03260000 L |
| H | -1 | -10.95318100 | 8.36439900  | -11.66675500 L |
| H | -1 | -12.04851000 | 10.45212500 | -10.90973500 L |
| H | -1 | -12.35796500 | 10.89127600 | -8.51278500 L  |
| H | -1 | -14.33785100 | 9.13902200  | -7.28868700 L  |
| H | -1 | -16.16134500 | 10.63797200 | -6.55650300 L  |
| H | -1 | -15.72822200 | 12.37293500 | -4.83898600 L  |
| H | -1 | -13.47812700 | 12.59836700 | -3.84352900 L  |
| C | -1 | -2.51450500  | 9.27548200  | 9.21064100 L   |
| C | -1 | -3.79674700  | 9.74752800  | 9.52790800 L   |
| C | -1 | -4.83779200  | 8.83778600  | 9.76253600 L   |
| C | -1 | -4.59961400  | 7.46134200  | 9.70158800 L   |
| C | -1 | -3.32165800  | 6.99668000  | 9.39278900 L   |
| C | -1 | -2.25998100  | 7.89074800  | 9.13797400 L   |
| C | -1 | -4.08746300  | 11.18712000 | 9.66571800 L   |
| C | -1 | -7.09978100  | 7.06884200  | 9.70894900 L   |
| C | -1 | -6.28942100  | 10.62874100 | 10.65956100 L  |
| N | -1 | -6.16098300  | 9.31916100  | 10.06155900 L  |
| C | -1 | -7.28312600  | 8.46881600  | 9.73635400 L   |
| C | -1 | -5.29004500  | 11.59302600 | 10.41554200 L  |
| C | -1 | -5.73546100  | 6.53715700  | 9.88792900 L   |
| C | -1 | -8.16639700  | 6.22692500  | 9.35931500 L   |
| C | -1 | -9.36677600  | 6.77771000  | 8.91345300 L   |
| C | -1 | -9.50523100  | 8.16308500  | 8.82244700 L   |
| C | -1 | -8.49200700  | 9.00902000  | 9.27255800 L   |
| C | -1 | -7.31529100  | 10.92069100 | 11.57367700 L  |
| C | -1 | -7.36873800  | 12.17536500 | 12.18800700 L  |
| C | -1 | -6.44288400  | 13.16454100 | 11.85363000 L  |
| C | -1 | -5.40014100  | 12.87605200 | 10.97299900 L  |
| O | -1 | -3.33601600  | 12.02353800 | 9.19798900 L   |
| O | -1 | -5.54848100  | 5.35787200  | 10.13701400 L  |
| C | -1 | -0.93802300  | 7.35977300  | 8.69015000 L   |
| C | -1 | -0.57449400  | 6.03365700  | 8.97188700 L   |
| C | -1 | 0.41602600   | 5.38555500  | 8.23288500 L   |
| C | -1 | 1.10526300   | 6.08334700  | 7.22849300 L   |

|    |    |              |             |               |
|----|----|--------------|-------------|---------------|
| C  | -1 | 0.95859100   | 7.48460400  | 7.17964200 L  |
| C  | -1 | -0.08458400  | 8.10893200  | 7.86508700 L  |
| N  | -1 | 1.79700200   | 5.39738400  | 6.16411800 L  |
| C  | -1 | 2.29261500   | 4.03504100  | 6.32247400 L  |
| C  | -1 | 1.78749700   | 6.04659900  | 4.85977700 L  |
| C  | -1 | 1.93848700   | 7.44316200  | 4.73623000 L  |
| C  | -1 | 1.92365100   | 8.05092900  | 3.47462900 L  |
| C  | -1 | 1.70776500   | 7.28730900  | 2.32870600 L  |
| C  | -1 | 1.49144400   | 5.91853500  | 2.44017700 L  |
| C  | -1 | 1.52009000   | 5.31127000  | 3.69629700 L  |
| C  | -1 | 3.22480600   | 3.50782300  | 5.40239700 L  |
| C  | -1 | 3.69762200   | 2.19989600  | 5.50621600 L  |
| C  | -1 | 3.25379700   | 1.38026200  | 6.53411100 L  |
| C  | -1 | 2.35491400   | 1.87778500  | 7.47043000 L  |
| C  | -1 | 1.87538800   | 3.19273300  | 7.37946100 L  |
| S- | -1 | 2.04814900   | 8.51031000  | 6.17479300 L  |
| S- | -1 | 0.69417600   | 3.65896100  | 8.64791700 L  |
| H  | -1 | -1.71534200  | 9.98921200  | 9.06754300 L  |
| H  | -1 | -3.18549200  | 5.93415600  | 9.29443500 L  |
| H  | -1 | -8.04749700  | 5.15143000  | 9.35941400 L  |
| H  | -1 | -10.16816000 | 6.13015800  | 8.58658600 L  |
| H  | -1 | -10.38986500 | 8.58453500  | 8.37996800 L  |
| H  | -1 | -8.62523200  | 10.08065900 | 9.19464400 L  |
| H  | -1 | -8.04045000  | 10.16617000 | 11.84781400 L |
| H  | -1 | -8.11353000  | 12.37774000 | 12.94148500 L |
| H  | -1 | -6.51279800  | 14.14466400 | 12.30577700 L |
| H  | -1 | -4.65067600  | 13.63197300 | 10.77560300 L |
| H  | -1 | -1.10125600  | 5.46792900  | 9.72750200 L  |
| H  | -1 | -0.26717700  | 9.15456800  | 7.66547600 L  |
| H  | -1 | 2.04053500   | 9.12344000  | 3.38545100 L  |
| H  | -1 | 1.69130500   | 7.75542400  | 1.35589600 L  |
| H  | -1 | 1.30517600   | 5.32919000  | 1.55247600 L  |
| H  | -1 | 1.34788900   | 4.26050700  | 3.77554000 L  |
| H  | -1 | 3.60382000   | 4.11319100  | 4.59602000 L  |
| H  | -1 | 4.41763800   | 1.82575800  | 4.79137900 L  |
| H  | -1 | 3.60638200   | 0.35992300  | 6.60698100 L  |
| H  | -1 | 2.02151000   | 1.23073700  | 8.27245600 L  |

QAD-DPTZ(Amorphous 1),T<sub>1</sub>:

|   |    |             |             |              |
|---|----|-------------|-------------|--------------|
| C | -1 | 14.40044800 | -2.86462000 | 3.58727600 L |
| C | -1 | 13.84809100 | -3.28580900 | 2.37271900 L |
| C | -1 | 13.06165900 | -4.44998700 | 2.32795600 L |
| C | -1 | 12.86870600 | -5.20643700 | 3.50027900 L |
| C | -1 | 13.42292700 | -4.77137200 | 4.71398700 L |
| C | -1 | 14.16292400 | -3.58321800 | 4.76960600 L |

|    |    |             |             |               |
|----|----|-------------|-------------|---------------|
| C  | -1 | 14.01642000 | -2.48652300 | 1.14539300 L  |
| C  | -1 | 11.73623600 | -7.00112900 | 2.10309800 L  |
| C  | -1 | 12.25918600 | -3.85641900 | 0.04324700 L  |
| N  | -1 | 12.43990000 | -4.85552700 | 1.08590200 L  |
| C  | -1 | 12.00584000 | -6.23372900 | 0.94841100 L  |
| C  | -1 | 13.09272000 | -2.71657600 | 0.02036200 L  |
| C  | -1 | 12.08301500 | -6.45065700 | 3.42815300 L  |
| C  | -1 | 11.23384700 | -8.30629500 | 1.97243800 L  |
| C  | -1 | 11.04675100 | -8.86440600 | 0.70984400 L  |
| C  | -1 | 11.40681000 | -8.14902300 | -0.42882800 L |
| C  | -1 | 11.91452800 | -6.85487300 | -0.31146100 L |
| C  | -1 | 11.21468800 | -3.94580100 | -0.90030000 L |
| C  | -1 | 11.09317700 | -2.99786400 | -1.91963800 L |
| C  | -1 | 11.97651000 | -1.92063700 | -1.98318900 L |
| C  | -1 | 12.96033500 | -1.76626200 | -1.00625700 L |
| O  | -1 | 14.86964600 | -1.61602100 | 1.08201100 L  |
| O  | -1 | 11.76751700 | -7.03959700 | 4.44899100 L  |
| C  | -1 | 14.66710000 | -3.06196900 | 6.05846700 L  |
| C  | -1 | 15.30482500 | -3.90499600 | 6.98389400 L  |
| C  | -1 | 15.90067800 | -3.37233300 | 8.13445600 L  |
| C  | -1 | 15.88023200 | -1.98531400 | 8.34655800 L  |
| C  | -1 | 15.21885600 | -1.14546300 | 7.44036500 L  |
| C  | -1 | 14.57847700 | -1.68885500 | 6.33019200 L  |
| N  | -1 | 16.62840500 | -1.40735800 | 9.41578300 L  |
| C  | -1 | 16.69706000 | -2.07142100 | 10.68222800 L |
| C  | -1 | 17.45668500 | -0.27664200 | 9.11267800 L  |
| C  | -1 | 16.97979200 | 0.71976600  | 8.24542400 L  |
| C  | -1 | 17.83517200 | 1.74548800  | 7.82649600 L  |
| C  | -1 | 19.16569900 | 1.76685800  | 8.24933100 L  |
| C  | -1 | 19.64213500 | 0.77403700  | 9.10865800 L  |
| C  | -1 | 18.79069600 | -0.24014800 | 9.54576900 L  |
| C  | -1 | 16.66594700 | -1.32637900 | 11.87258000 L |
| C  | -1 | 16.74265100 | -1.97311300 | 13.10790200 L |
| C  | -1 | 16.87344800 | -3.36212200 | 13.15940000 L |
| C  | -1 | 16.92067900 | -4.10254100 | 11.97857300 L |
| C  | -1 | 16.79590400 | -3.46944100 | 10.73845700 L |
| S- | -1 | 15.28149900 | 0.65782700  | 7.61136100 L  |
| S- | -1 | 16.80336600 | -4.49146100 | 9.24169200 L  |
| H  | -1 | 14.99502400 | -1.95981100 | 3.61752700 L  |
| H  | -1 | 13.25826000 | -5.34246300 | 5.61777500 L  |
| H  | -1 | 11.02090000 | -8.90805500 | 2.84342500 L  |
| H  | -1 | 10.67714800 | -9.87349400 | 0.61594300 L  |
| H  | -1 | 11.31153900 | -8.60776200 | -1.40254300 L |
| H  | -1 | 12.23936700 | -6.34255700 | -1.20562700 L |
| H  | -1 | 10.48214600 | -4.73787000 | -0.84553900 L |
| H  | -1 | 10.30449700 | -3.09103400 | -2.65481100 L |

|   |    |             |              |               |
|---|----|-------------|--------------|---------------|
| H | -1 | 11.87275300 | -1.18147600  | -2.76690100 L |
| H | -1 | 13.59213400 | -0.88697800  | -1.03121600 L |
| H | -1 | 15.38306900 | -4.96743200  | 6.78922700 L  |
| H | -1 | 14.07099300 | -1.02617100  | 5.63936500 L  |
| H | -1 | 17.48662800 | 2.50055700   | 7.13592300 L  |
| H | -1 | 19.83039000 | 2.54441100   | 7.89626100 L  |
| H | -1 | 20.67739200 | 0.77178400   | 9.41948000 L  |
| H | -1 | 19.18396000 | -1.02490600  | 10.17989000 L |
| H | -1 | 16.56548000 | -0.24899500  | 11.83932100 L |
| H | -1 | 16.70521500 | -1.39752900  | 14.02269300 L |
| H | -1 | 16.92705800 | -3.87120100  | 14.11104700 L |
| H | -1 | 17.03724200 | -5.17195600  | 12.03062000 L |
| C | -1 | 15.26426200 | -11.62114200 | -2.95943300 L |
| C | -1 | 16.43918000 | -11.24749900 | -2.28220400 L |
| C | -1 | 16.34614800 | -10.52002700 | -1.08679500 L |
| C | -1 | 15.09605300 | -10.31011900 | -0.49299700 L |
| C | -1 | 13.93497300 | -10.71435000 | -1.15180300 L |
| C | -1 | 13.99443500 | -11.27099700 | -2.44744600 L |
| C | -1 | 17.78193000 | -11.55102100 | -2.82114200 L |
| C | -1 | 16.11106500 | -8.52385500  | 0.96437300 L  |
| C | -1 | 18.81659200 | -10.48496500 | -0.81673700 L |
| N | -1 | 17.52186100 | -9.91898000  | -0.50310700 L |
| C | -1 | 17.33872200 | -8.72053200  | 0.29491700 L  |
| C | -1 | 18.97088200 | -11.26088200 | -1.98774400 L |
| C | -1 | 15.02644900 | -9.48855300  | 0.72611800 L  |
| C | -1 | 15.87619100 | -7.34153500  | 1.68237700 L  |
| C | -1 | 16.82892000 | -6.32318100  | 1.67967500 L  |
| C | -1 | 18.01345800 | -6.47622500  | 0.95514900 L  |
| C | -1 | 18.27535500 | -7.67034800  | 0.27510400 L  |
| C | -1 | 19.90024300 | -10.36031200 | 0.07163100 L  |
| C | -1 | 21.13586700 | -10.93257800 | -0.23683300 L |
| C | -1 | 21.30137500 | -11.64371600 | -1.42564200 L |
| C | -1 | 20.22623600 | -11.81096500 | -2.30030600 L |
| O | -1 | 17.90604200 | -12.06532500 | -3.92040200 L |
| O | -1 | 14.06566200 | -9.55476900  | 1.47369600 L  |
| C | -1 | 12.76178600 | -11.32200300 | -3.30643200 L |
| C | -1 | 11.47847100 | -11.22770000 | -2.73658100 L |
| C | -1 | 10.34917700 | -11.00082300 | -3.52337000 L |
| C | -1 | 10.46197900 | -10.93112600 | -4.92220100 L |
| C | -1 | 11.72452000 | -11.11095900 | -5.51459100 L |
| C | -1 | 12.85701500 | -11.29006000 | -4.71185800 L |
| N | -1 | 9.29689200  | -10.70654800 | -5.73082500 L |
| C | -1 | 8.02718800  | -11.25050100 | -5.31073800 L |
| C | -1 | 9.41326400  | -10.01575100 | -6.99144400 L |
| C | -1 | 10.51889200 | -10.23162600 | -7.83207500 L |
| C | -1 | 10.53154100 | -9.68646800  | -9.12280700 L |

|   |    |             |              |                |
|---|----|-------------|--------------|----------------|
| C | -1 | 9.50666100  | -8.83895100  | -9.54083100 L  |
| C | -1 | 8.45636500  | -8.54313700  | -8.67613700 L  |
| C | -1 | 8.39582600  | -9.14071300  | -7.41588300 L  |
| C | -1 | 7.13626100  | -11.78253000 | -6.25921400 L  |
| C | -1 | 5.89185300  | -12.28004100 | -5.86910900 L  |
| C | -1 | 5.53009500  | -12.27522000 | -4.52319900 L  |
| C | -1 | 6.42293700  | -11.79228900 | -3.56648200 L  |
| C | -1 | 7.67429900  | -11.29362500 | -3.95098600 L  |
| S | -1 | 11.96444900 | -11.17729400 | -7.30892700 L  |
| S | -1 | 8.78633000  | -10.71585000 | -2.65644100 L  |
| H | -1 | 15.34969900 | -12.15437600 | -3.89586000 L  |
| H | -1 | 12.99637600 | -10.46111600 | -0.69088700 L  |
| H | -1 | 14.93173400 | -7.17930600  | 2.18695800 L   |
| H | -1 | 16.63246000 | -5.40062500  | 2.21058200 L   |
| H | -1 | 18.73659500 | -5.67172800  | 0.93114000 L   |
| H | -1 | 19.18689000 | -7.75294600  | -0.30089400 L  |
| H | -1 | 19.78613000 | -9.84015100  | 1.01288200 L   |
| H | -1 | 21.96358800 | -10.83394300 | 0.45336500 L   |
| H | -1 | 22.25678200 | -12.09096800 | -1.65501600 L  |
| H | -1 | 20.36827200 | -12.39389500 | -3.20236600 L  |
| H | -1 | 11.33098400 | -11.30686300 | -1.67022100 L  |
| H | -1 | 13.81560200 | -11.34651000 | -5.20532900 L  |
| H | -1 | 11.35756800 | -9.88729700  | -9.79278400 L  |
| H | -1 | 9.54034600  | -8.38913100  | -10.52402000 L |
| H | -1 | 7.69101200  | -7.84555200  | -8.98220200 L  |
| H | -1 | 7.55916400  | -8.91601800  | -6.76695900 L  |
| H | -1 | 7.42171300  | -11.82858400 | -7.29758500 L  |
| H | -1 | 5.21180900  | -12.67779700 | -6.60768600 L  |
| H | -1 | 4.56742800  | -12.66559400 | -4.21874400 L  |
| H | -1 | 6.15045600  | -11.83019000 | -2.52069900 L  |
| C | -1 | 12.64359600 | -2.03572500  | 17.15725300 L  |
| C | -1 | 12.88734100 | -3.14099300  | 17.98449200 L  |
| C | -1 | 12.14584700 | -4.32445800  | 17.80876700 L  |
| C | -1 | 11.16351700 | -4.39599300  | 16.80622400 L  |
| C | -1 | 10.97621100 | -3.30796900  | 15.93978400 L  |
| C | -1 | 11.68557300 | -2.11139300  | 16.13620000 L  |
| C | -1 | 13.91044000 | -3.09448800  | 19.04795600 L  |
| C | -1 | 10.27886000 | -6.51319500  | 17.90721400 L  |
| C | -1 | 13.65581300 | -5.54696700  | 19.35112400 L  |
| N | -1 | 12.37793900 | -5.45626600  | 18.67560200 L  |
| C | -1 | 11.30321900 | -6.41046400  | 18.87496600 L  |
| C | -1 | 14.36365600 | -4.36442200  | 19.64778700 L  |
| C | -1 | 10.28151400 | -5.58119700  | 16.75853300 L  |
| C | -1 | 9.24844000  | -7.45364300  | 18.07696300 L  |
| C | -1 | 9.21676700  | -8.26364200  | 19.21334700 L  |
| C | -1 | 10.19426400 | -8.12980300  | 20.19747200 L  |

|   |    |             |             |               |
|---|----|-------------|-------------|---------------|
| C | -1 | 11.22072800 | -7.19788300 | 20.04136800 L |
| C | -1 | 14.25134800 | -6.78816100 | 19.64379900 L |
| C | -1 | 15.45941200 | -6.84052400 | 20.34080000 L |
| C | -1 | 16.06998400 | -5.66611400 | 20.77434700 L |
| C | -1 | 15.53917400 | -4.42803200 | 20.40921200 L |
| O | -1 | 14.40740700 | -2.03279000 | 19.38742000 L |
| O | -1 | 9.52741300  | -5.75633500 | 15.81547500 L |
| C | -1 | 11.36466200 | -0.91478200 | 15.33031800 L |
| C | -1 | 11.29280700 | -0.99608000 | 13.93616900 L |
| C | -1 | 10.97251900 | 0.13058500  | 13.17344200 L |
| C | -1 | 10.61859600 | 1.33669400  | 13.81182400 L |
| C | -1 | 10.66999400 | 1.41412100  | 15.21668000 L |
| C | -1 | 11.08481700 | 0.30559200  | 15.96064900 L |
| N | -1 | 10.18748900 | 2.46724800  | 13.04143700 L |
| C | -1 | 10.80335700 | 2.73343700  | 11.76650400 L |
| C | -1 | 9.14188800  | 3.32163100  | 13.55249900 L |
| C | -1 | 9.05306200  | 3.60319300  | 14.92848900 L |
| C | -1 | 8.04972600  | 4.46040300  | 15.40246200 L |
| C | -1 | 7.11205100  | 5.00897200  | 14.52492600 L |
| C | -1 | 7.17851800  | 4.71452700  | 13.16355800 L |
| C | -1 | 8.18735300  | 3.88070300  | 12.67843300 L |
| C | -1 | 11.02554600 | 4.06075800  | 11.35545800 L |
| C | -1 | 11.60149600 | 4.33209400  | 10.11599300 L |
| C | -1 | 11.95593500 | 3.28613700  | 9.26736800 L  |
| C | -1 | 11.76750000 | 1.96437300  | 9.67179900 L  |
| C | -1 | 11.20699000 | 1.67962300  | 10.92376000 L |
| S | -1 | 10.22182600 | 2.91653500  | 16.12782400 L |
| S | -1 | 10.99505400 | -0.05881300 | 11.37314000 L |
| H | -1 | 13.20884400 | -1.12102000 | 17.29472300 L |
| H | -1 | 10.23590600 | -3.36906900 | 15.15340900 L |
| H | -1 | 8.46451200  | -7.55317200 | 17.33792700 L |
| H | -1 | 8.42285800  | -8.98321600 | 19.34350700 L |
| H | -1 | 10.15350200 | -8.74436900 | 21.08782700 L |
| H | -1 | 11.93632400 | -7.08467400 | 20.84246400 L |
| H | -1 | 13.79175500 | -7.71325800 | 19.32253900 L |
| H | -1 | 15.91984400 | -7.79139700 | 20.56046200 L |
| H | -1 | 16.98712000 | -5.71626000 | 21.34675500 L |
| H | -1 | 16.07822700 | -3.52603700 | 20.66624700 L |
| H | -1 | 11.51291400 | -1.93351900 | 13.43893800 L |
| H | -1 | 11.13198200 | 0.37973700  | 17.04057600 L |
| H | -1 | 7.98471400  | 4.68826100  | 16.45789000 L |
| H | -1 | 6.33032200  | 5.65736700  | 14.90046200 L |
| H | -1 | 6.44870800  | 5.13218000  | 12.48185200 L |
| H | -1 | 8.21607200  | 3.66124700  | 11.61890100 L |
| H | -1 | 10.75936700 | 4.88831100  | 11.99984500 L |
| H | -1 | 11.77122100 | 5.35435900  | 9.81708100 L  |

|   |    |             |             |               |
|---|----|-------------|-------------|---------------|
| H | -1 | 12.38008900 | 3.50000600  | 8.29815700 L  |
| H | -1 | 12.07052400 | 1.15909600  | 9.01380900 L  |
| C | -1 | 14.68891000 | 8.31020400  | -1.77195600 L |
| C | -1 | 14.31384300 | 9.66196500  | -1.88638100 L |
| C | -1 | 14.18094500 | 10.45544800 | -0.72937500 L |
| C | -1 | 14.39982400 | 9.88004300  | 0.53701900 L  |
| C | -1 | 14.75398000 | 8.52355500  | 0.63633700 L  |
| C | -1 | 14.91700900 | 7.74061000  | -0.51247700 L |
| C | -1 | 14.10730300 | 10.28659900 | -3.20835100 L |
| C | -1 | 13.57956500 | 12.03344800 | 1.61900500 L  |
| C | -1 | 14.01096300 | 12.52406600 | -2.11840600 L |
| N | -1 | 13.82296800 | 11.85721900 | -0.83986800 L |
| C | -1 | 13.29685700 | 12.53766100 | 0.33207000 L  |
| C | -1 | 14.04944300 | 11.76026800 | -3.30441800 L |
| C | -1 | 14.22369400 | 10.71319000 | 1.74360200 L  |
| C | -1 | 13.17309000 | 12.74906200 | 2.76009400 L  |
| C | -1 | 12.45970800 | 13.94082100 | 2.62563200 L  |
| C | -1 | 12.09697000 | 14.39391900 | 1.35877100 L  |
| C | -1 | 12.46574900 | 13.67285300 | 0.22352700 L  |
| C | -1 | 14.21060300 | 13.91879600 | -2.20811300 L |
| C | -1 | 14.27018200 | 14.55035000 | -3.45118100 L |
| C | -1 | 14.20227500 | 13.79794500 | -4.62211200 L |
| C | -1 | 14.11518800 | 12.40645900 | -4.55230500 L |
| O | -1 | 14.03351800 | 9.59742100  | -4.21264200 L |
| O | -1 | 14.56279800 | 10.29756100 | 2.83789400 L  |
| C | -1 | 15.50981100 | 6.39279300  | -0.39242700 L |
| C | -1 | 14.81040300 | 5.33022600  | 0.19446800 L  |
| C | -1 | 15.46411300 | 4.11904200  | 0.48111600 L  |
| C | -1 | 16.83831600 | 3.97505600  | 0.19444500 L  |
| C | -1 | 17.51673000 | 5.02656500  | -0.44560400 L |
| C | -1 | 16.84742500 | 6.21482500  | -0.74601000 L |
| N | -1 | 17.54996100 | 2.80222800  | 0.62230600 L  |
| C | -1 | 17.17192400 | 2.17550700  | 1.86148100 L  |
| C | -1 | 18.70584800 | 2.32333100  | -0.09888800 L |
| C | -1 | 19.59225500 | 3.22142200  | -0.71523500 L |
| C | -1 | 20.79837700 | 2.75928000  | -1.25608600 L |
| C | -1 | 21.12002900 | 1.40517100  | -1.20503300 L |
| C | -1 | 20.22203200 | 0.49557500  | -0.64925900 L |
| C | -1 | 19.01597400 | 0.94677600  | -0.11207800 L |
| C | -1 | 18.16043000 | 1.70869000  | 2.74981800 L  |
| C | -1 | 17.80413700 | 0.99100300  | 3.88921500 L  |
| C | -1 | 16.46434400 | 0.70594500  | 4.13679400 L  |
| C | -1 | 15.47146000 | 1.20894300  | 3.29238000 L  |
| C | -1 | 15.81705700 | 1.99592900  | 2.18392200 L  |
| S | -1 | 19.28860400 | 4.99228200  | -0.78079400 L |
| S | -1 | 14.49540400 | 2.76326400  | 1.20779900 L  |



|   |    |             |              |               |
|---|----|-------------|--------------|---------------|
| H | -1 | 14.83749400 | 7.70951800   | -2.66101000 L |
| H | -1 | 14.93873300 | 8.08298000   | 1.60556800 L  |
| H | -1 | 13.39032700 | 12.37944700  | 3.75412800 L  |
| H | -1 | 12.15288600 | 14.49344400  | 3.50489800 L  |
| H | -1 | 11.52750200 | 15.30679300  | 1.25301700 L  |
| H | -1 | 12.10613400 | 14.01524700  | -0.73722100 L |
| H | -1 | 14.33764800 | 14.52597300  | -1.32192400 L |
| H | -1 | 14.39105800 | 15.62414300  | -3.50410600 L |
| H | -1 | 14.26261000 | 14.29055900  | -5.58467800 L |
| H | -1 | 14.12490300 | 11.83555500  | -5.47142400 L |
| H | -1 | 13.77104000 | 5.45862500   | 0.46478200 L  |
| H | -1 | 17.39282300 | 7.03588500   | -1.19413700 L |
| H | -1 | 21.49591900 | 3.45375200   | -1.70912400 L |
| H | -1 | 22.06408900 | 1.06308600   | -1.59869900 L |
| H | -1 | 20.46329200 | -0.55956000  | -0.62810500 L |
| H | -1 | 18.34265300 | 0.22526900   | 0.33269600 L  |
| H | -1 | 19.20977400 | 1.88425000   | 2.54717300 L  |
| H | -1 | 18.56901400 | 0.63570900   | 4.56679900 L  |
| H | -1 | 16.20192900 | 0.09773400   | 4.98595900 L  |
| H | -1 | 14.43557600 | 0.99053200   | 3.50993700 L  |
| C | -1 | 9.65199900  | -11.17996000 | 5.30091900 L  |
| C | -1 | 10.29708600 | -12.33702500 | 4.82700100 L  |
| C | -1 | 10.14045500 | -12.72237600 | 3.48081400 L  |
| C | -1 | 9.40928200  | -11.90343900 | 2.60059600 L  |
| C | -1 | 8.81055900  | -10.72497200 | 3.07383100 L  |
| C | -1 | 8.90144600  | -10.38098900 | 4.42939200 L  |
| C | -1 | 11.13947600 | -13.16403600 | 5.71371800 L  |
| C | -1 | 9.44680900  | -13.77384100 | 0.88540500 L  |
| C | -1 | 11.75140500 | -14.60549600 | 3.77518200 L  |
| N | -1 | 10.69152000 | -13.97600600 | 3.01248400 L  |
| C | -1 | 10.10167500 | -14.58656000 | 1.83357200 L  |
| C | -1 | 11.91129500 | -14.28643100 | 5.14109700 L  |
| C | -1 | 9.21618400  | -12.35477300 | 1.20867100 L  |
| C | -1 | 8.89542600  | -14.34847100 | -0.27301200 L |
| C | -1 | 8.90095000  | -15.73416800 | -0.43516700 L |
| C | -1 | 9.46348400  | -16.55041500 | 0.54477600 L  |
| C | -1 | 10.05786700 | -15.98467800 | 1.67265700 L  |
| C | -1 | 12.67228200 | -15.48626200 | 3.17148700 L  |
| C | -1 | 13.64068800 | -16.13430200 | 3.93904700 L  |
| C | -1 | 13.72026000 | -15.89950300 | 5.31077200 L  |
| C | -1 | 12.86683100 | -14.97221700 | 5.91020600 L  |
| O | -1 | 11.25898800 | -12.87439400 | 6.89276900 L  |
| O | -1 | 8.80884400  | -11.58501500 | 0.35853400 L  |
| C | -1 | 8.13409100  | -9.23081600  | 4.94062900 L  |
| C | -1 | 6.99261700  | -9.44114800  | 5.71998000 L  |
| C | -1 | 6.14030600  | -8.37994700  | 6.03362500 L  |

|   |    |              |              |                |
|---|----|--------------|--------------|----------------|
| C | -1 | 6.48778100   | -7.06757600  | 5.66360100 L   |
| C | -1 | 7.69818200   | -6.84293100  | 4.98281700 L   |
| C | -1 | 8.47509500   | -7.92809800  | 4.57149500 L   |
| N | -1 | 5.59016700   | -5.98239700  | 5.93035000 L   |
| C | -1 | 4.17074500   | -6.20544500  | 5.79659400 L   |
| C | -1 | 6.11527400   | -4.68938400  | 6.29295800 L   |
| C | -1 | 7.34245100   | -4.23661500  | 5.77006800 L   |
| C | -1 | 7.82520200   | -2.96916200  | 6.12124600 L   |
| C | -1 | 7.09318500   | -2.14298000  | 6.97362300 L   |
| C | -1 | 5.88115500   | -2.58654400  | 7.50099000 L   |
| C | -1 | 5.40497800   | -3.85951100  | 7.18290600 L   |
| C | -1 | 3.34254100   | -5.21586700  | 5.23222400 L   |
| C | -1 | 1.96543500   | -5.42156900  | 5.12301200 L   |
| C | -1 | 1.40078500   | -6.62107500  | 5.55916400 L   |
| C | -1 | 2.21373300   | -7.61746000  | 6.10245300 L   |
| C | -1 | 3.59755000   | -7.42374500  | 6.20853100 L   |
| S | -1 | 8.29958300   | -5.19051700  | 4.56513800 L   |
| S | -1 | 4.59584700   | -8.76605900  | 6.89867200 L   |
| H | -1 | 9.72749600   | -10.89711900 | 6.34610300 L   |
| H | -1 | 8.22426700   | -10.10294200 | 2.40543500 L   |
| H | -1 | 8.40755100   | -13.73460800 | -1.01943700 L  |
| H | -1 | 8.42420400   | -16.17962000 | -1.29759200 L  |
| H | -1 | 9.43086800   | -17.62568200 | 0.43827300 L   |
| H | -1 | 10.44599900  | -16.64465700 | 2.43501900 L   |
| H | -1 | 12.64920300  | -15.67100000 | 2.10581000 L   |
| H | -1 | 14.33923400  | -16.80894300 | 3.46716400 L   |
| H | -1 | 14.47220000  | -16.40465300 | 5.90288000 L   |
| H | -1 | 12.98295600  | -14.76002300 | 6.96505100 L   |
| H | -1 | 6.72062800   | -10.43950500 | 6.02228800 L   |
| H | -1 | 9.34852000   | -7.75061500  | 3.96831900 L   |
| H | -1 | 8.76347800   | -2.61425800  | 5.71336100 L   |
| H | -1 | 7.46659500   | -1.15847000  | 7.22427400 L   |
| H | -1 | 5.31456700   | -1.94661600  | 8.16559700 L   |
| H | -1 | 4.47495200   | -4.19395700  | 7.62427800 L   |
| H | -1 | 3.76359500   | -4.28575300  | 4.87319100 L   |
| H | -1 | 1.33639200   | -4.64950600  | 4.69974100 L   |
| H | -1 | 0.33437800   | -6.78349800  | 5.46940700 L   |
| H | -1 | 1.76819600   | -8.54995700  | 6.42632300 L   |
| C | -1 | -11.21558500 | -0.53487400  | -11.06089600 L |
| C | -1 | -11.76794100 | -0.95606300  | -12.27545200 L |
| C | -1 | -12.55437300 | -2.12024000  | -12.32021600 L |
| C | -1 | -12.74732500 | -2.87669100  | -11.14789200 L |
| C | -1 | -12.19310600 | -2.44162600  | -9.93418400 L  |
| C | -1 | -11.45310900 | -1.25347200  | -9.87856600 L  |
| C | -1 | -11.59961200 | -0.15677700  | -13.50277900 L |
| C | -1 | -13.87970900 | -4.67139000  | -12.54502400 L |

|   |    |              |             |                |
|---|----|--------------|-------------|----------------|
| C | -1 | -13.35684600 | -1.52667300 | -14.60492500 L |
| N | -1 | -13.17613300 | -2.52578100 | -13.56226900 L |
| C | -1 | -13.61019300 | -3.90398300 | -13.69976100 L |
| C | -1 | -12.52322600 | -0.38683700 | -14.62776000 L |
| C | -1 | -13.53301800 | -4.12091100 | -11.22001800 L |
| C | -1 | -14.38218600 | -5.97654900 | -12.67573300 L |
| C | -1 | -14.56928200 | -6.53465900 | -13.93832800 L |
| C | -1 | -14.20913500 | -5.81928500 | -15.07695000 L |
| C | -1 | -13.70150400 | -4.52512700 | -14.95963300 L |
| C | -1 | -14.40134400 | -1.61605500 | -15.54847100 L |
| C | -1 | -14.52276900 | -0.66812600 | -16.56776000 L |
| C | -1 | -13.63952300 | 0.40910900  | -16.63136000 L |
| C | -1 | -12.65569700 | 0.56348400  | -15.65442800 L |
| O | -1 | -10.74630000 | 0.71371700  | -13.56611100 L |
| O | -1 | -13.84851600 | -4.70985000 | -10.19918100 L |
| C | -1 | -10.94893300 | -0.73222300 | -8.58970400 L  |
| C | -1 | -10.31112100 | -1.57525800 | -7.66422900 L  |
| C | -1 | -9.71535300  | -1.04258700 | -6.51371500 L  |
| C | -1 | -9.73571300  | 0.34442400  | -6.30156400 L  |
| C | -1 | -10.39717700 | 1.18428400  | -7.20780700 L  |
| C | -1 | -11.03755500 | 0.64089200  | -8.31797900 L  |
| N | -1 | -8.98762800  | 0.92238800  | -5.23238800 L  |
| C | -1 | -8.91897300  | 0.25832500  | -3.96594400 L  |
| C | -1 | -8.15926200  | 2.05309700  | -5.53544400 L  |
| C | -1 | -8.63624100  | 3.04951200  | -6.40274800 L  |
| C | -1 | -7.78086000  | 4.07523400  | -6.82167600 L  |
| C | -1 | -6.45033200  | 4.09660400  | -6.39884000 L  |
| C | -1 | -5.97381000  | 3.10377500  | -5.53946400 L  |
| C | -1 | -6.82525000  | 2.08959000  | -5.10235300 L  |
| C | -1 | -8.95008600  | 1.00336700  | -2.77559100 L  |
| C | -1 | -8.87338200  | 0.35663400  | -1.54027000 L  |
| C | -1 | -8.74249900  | -1.03238400 | -1.48872200 L  |
| C | -1 | -8.69535300  | -1.77279500 | -2.66959900 L  |
| C | -1 | -8.82012800  | -1.13969500 | -3.90971500 L  |
| S | -1 | -10.33453300 | 2.98757300  | -7.03681100 L  |
| S | -1 | -8.81266600  | -2.16171500 | -5.40647900 L  |
| H | -1 | -10.62100900 | 0.36993500  | -11.03064500 L |
| H | -1 | -12.35777300 | -3.01271700 | -9.03039700 L  |
| H | -1 | -14.59513300 | -6.57830900 | -11.80474700 L |
| H | -1 | -14.93888500 | -7.54374700 | -14.03222800 L |
| H | -1 | -14.30449400 | -6.27801500 | -16.05071400 L |
| H | -1 | -13.37666500 | -4.01281100 | -15.85379800 L |
| H | -1 | -15.13380000 | -2.40813200 | -15.49366100 L |
| H | -1 | -15.31153400 | -0.76128800 | -17.30298200 L |
| H | -1 | -13.74319300 | 1.14826200  | -17.41502300 L |
| H | -1 | -12.02381200 | 1.44276100  | -15.67933800 L |

|   |    |              |              |               |
|---|----|--------------|--------------|---------------|
| H | -1 | -10.23296200 | -2.63768600  | -7.85894400 L |
| H | -1 | -11.54504000 | 1.30357600   | -9.00880600 L |
| H | -1 | -8.12940500  | 4.83030300   | -7.51224900 L |
| H | -1 | -5.78555600  | 4.87415000   | -6.75186100 L |
| H | -1 | -4.93855500  | 3.10152200   | -5.22864200 L |
| H | -1 | -6.43198700  | 1.30483200   | -4.46823200 L |
| H | -1 | -9.05055200  | 2.08075100   | -2.80885100 L |
| H | -1 | -8.91081600  | 0.93221700   | -0.62547800 L |
| H | -1 | -8.68897500  | -1.54145400  | -0.53712500 L |
| H | -1 | -8.57870300  | -2.84221700  | -2.61750200 L |
| C | -1 | 8.24535900   | -5.85319100  | -6.30029900 L |
| C | -1 | 6.98808100   | -5.27847300  | -6.07866200 L |
| C | -1 | 6.60471200   | -4.92368300  | -4.77812700 L |
| C | -1 | 7.51292700   | -5.07193500  | -3.71892200 L |
| C | -1 | 8.81120800   | -5.54230700  | -3.97020300 L |
| C | -1 | 9.18872800   | -5.98149300  | -5.25999100 L |
| C | -1 | 6.06811600   | -4.99535800  | -7.19872700 L |
| C | -1 | 5.59109600   | -4.75192500  | -2.09800500 L |
| C | -1 | 4.54200100   | -3.81741900  | -5.62313200 L |
| N | -1 | 5.27516300   | -4.41727600  | -4.52543800 L |
| C | -1 | 4.71814900   | -4.59804400  | -3.19758200 L |
| C | -1 | 4.88454600   | -4.14871100  | -6.95260800 L |
| C | -1 | 7.04391800   | -4.79112300  | -2.34707100 L |
| C | -1 | 5.07437400   | -5.02442800  | -0.82064400 L |
| C | -1 | 3.70191100   | -5.19297900  | -0.64289900 L |
| C | -1 | 2.83672200   | -5.07594600  | -1.72734700 L |
| C | -1 | 3.33752900   | -4.78947500  | -2.99951100 L |
| C | -1 | 3.55902800   | -2.83543200  | -5.39892600 L |
| C | -1 | 2.87102200   | -2.26293000  | -6.47122000 L |
| C | -1 | 3.15626100   | -2.65779800  | -7.77828900 L |
| C | -1 | 4.16415800   | -3.59121500  | -8.02219000 L |
| O | -1 | 6.32308600   | -5.38917600  | -8.32559300 L |
| O | -1 | 7.83537900   | -4.65932100  | -1.42855000 L |
| C | -1 | 10.55247700  | -6.56231500  | -5.52329600 L |
| C | -1 | 11.34340000  | -7.06406700  | -4.47342300 L |
| C | -1 | 12.63559200  | -7.54461400  | -4.70274300 L |
| C | -1 | 13.12827800  | -7.65116200  | -6.01351300 L |
| C | -1 | 12.34054800  | -7.18378800  | -7.07767000 L |
| C | -1 | 11.08996600  | -6.61546600  | -6.82612400 L |
| N | -1 | 14.42259300  | -8.21897400  | -6.26547600 L |
| C | -1 | 15.50475200  | -7.99727300  | -5.33825200 L |
| C | -1 | 14.62785200  | -9.00409600  | -7.45635400 L |
| C | -1 | 14.03035700  | -8.62933000  | -8.67311600 L |
| C | -1 | 14.30509600  | -9.35791900  | -9.83788300 L |
| C | -1 | 15.11722400  | -10.49213900 | -9.78733300 L |
| C | -1 | 15.66667300  | -10.90253600 | -8.57325200 L |

|   |    |              |              |                |
|---|----|--------------|--------------|----------------|
| C | -1 | 15.43177500  | -10.16047100 | -7.41458200 L  |
| C | -1 | 16.82957500  | -7.89020300  | -5.80620100 L  |
| C | -1 | 17.88992200  | -7.75411100  | -4.91082600 L  |
| C | -1 | 17.64105300  | -7.66408000  | -3.54266500 L  |
| C | -1 | 16.32943300  | -7.70693600  | -3.07142700 L  |
| C | -1 | 15.26151300  | -7.88133200  | -3.95823300 L  |
| S | -1 | 12.90810300  | -7.21682200  | -8.79886600 L  |
| S | -1 | 13.60814500  | -7.99572200  | -3.24972300 L  |
| H | -1 | 8.47348900   | -6.18555000  | -7.29689600 L  |
| H | -1 | 9.50677900   | -5.57241200  | -3.14576800 L  |
| H | -1 | 5.73444400   | -5.17143800  | 0.02505100 L   |
| H | -1 | 3.30990400   | -5.45807700  | 0.32944100 L   |
| H | -1 | 1.78188700   | -5.25696800  | -1.58548100 L  |
| H | -1 | 2.65451400   | -4.79227300  | -3.83638500 L  |
| H | -1 | 3.35472400   | -2.47763100  | -4.39872300 L  |
| H | -1 | 2.12364400   | -1.50231800  | -6.28885900 L  |
| H | -1 | 2.61785500   | -2.21619500  | -8.60660900 L  |
| H | -1 | 4.40656900   | -3.84737700  | -9.04619200 L  |
| H | -1 | 10.97513000  | -7.08602000  | -3.45946800 L  |
| H | -1 | 10.55504800  | -6.22423400  | -7.67421300 L  |
| H | -1 | 13.87204800  | -9.05639600  | -10.78280500 L |
| H | -1 | 15.31687200  | -11.05566100 | -10.68803800 L |
| H | -1 | 16.28027500  | -11.79265800 | -8.53034800 L  |
| H | -1 | 15.87707800  | -10.48698600 | -6.48253800 L  |
| H | -1 | 17.04467400  | -7.92693200  | -6.86616000 L  |
| H | -1 | 18.90464800  | -7.72563000  | -5.28082800 L  |
| H | -1 | 18.46277900  | -7.55367900  | -2.84859800 L  |
| H | -1 | 16.13917800  | -7.60291100  | -2.01187900 L  |
| C | -1 | -9.14440000  | -5.02590100  | -0.77178600 L  |
| C | -1 | -10.24744600 | -5.26307900  | -1.59785600 L  |
| C | -1 | -11.50333600 | -5.53062200  | -1.03490100 L  |
| C | -1 | -11.64871700 | -5.52438200  | 0.36488000 L   |
| C | -1 | -10.55480500 | -5.17485400  | 1.18336700 L   |
| C | -1 | -9.28436000  | -4.94126400  | 0.62492100 L   |
| C | -1 | -10.11853900 | -5.19344300  | -3.06184100 L  |
| C | -1 | -13.98169900 | -6.51005100  | 0.06334100 L   |
| C | -1 | -12.58822100 | -5.36498900  | -3.27552200 L  |
| N | -1 | -12.63436300 | -5.82210000  | -1.89342300 L  |
| C | -1 | -13.76161300 | -6.54271400  | -1.33064100 L  |
| C | -1 | -11.33874800 | -5.10997800  | -3.87875900 L  |
| C | -1 | -12.93695700 | -5.94874800  | 0.94653000 L   |
| C | -1 | -15.14524800 | -7.08772400  | 0.59836400 L   |
| C | -1 | -16.03880700 | -7.77022800  | -0.22738200 L  |
| C | -1 | -15.75347700 | -7.92592800  | -1.58225100 L  |
| C | -1 | -14.61457600 | -7.33295800  | -2.12953300 L  |
| C | -1 | -13.75770800 | -5.11167900  | -4.02419400 L  |

|   |    |              |             |               |
|---|----|--------------|-------------|---------------|
| C | -1 | -13.67239200 | -4.77460000 | -5.37809900 L |
| C | -1 | -12.43243400 | -4.58338700 | -5.97787500 L |
| C | -1 | -11.27135200 | -4.72541500 | -5.22651000 L |
| O | -1 | -9.01833800  | -5.14590000 | -3.58495000 L |
| O | -1 | -13.10114800 | -5.92401700 | 2.15420700 L  |
| C | -1 | -8.08051300  | -4.67276900 | 1.47267900 L  |
| C | -1 | -7.91933800  | -5.26000000 | 2.73868000 L  |
| C | -1 | -6.70189200  | -5.16899900 | 3.42914400 L  |
| C | -1 | -5.60380800  | -4.51004700 | 2.84148100 L  |
| C | -1 | -5.77775400  | -3.88644800 | 1.59430100 L  |
| C | -1 | -7.01874300  | -3.91522700 | 0.95934900 L  |
| N | -1 | -4.32621500  | -4.47491500 | 3.50214300 L  |
| C | -1 | -4.27127100  | -4.40171600 | 4.94195200 L  |
| C | -1 | -3.11109900  | -4.51801900 | 2.72000900 L  |
| C | -1 | -3.04323300  | -3.89748100 | 1.45988700 L  |
| C | -1 | -1.84555100  | -3.90205600 | 0.73902300 L  |
| C | -1 | -0.73153300  | -4.58913800 | 1.21926000 L  |
| C | -1 | -0.79338000  | -5.23368400 | 2.45169900 L  |
| C | -1 | -1.96599400  | -5.18292900 | 3.20760700 L  |
| C | -1 | -3.26541800  | -3.64402100 | 5.57681900 L  |
| C | -1 | -3.17470300  | -3.60756900 | 6.96843800 L  |
| C | -1 | -4.07632200  | -4.33507300 | 7.74238400 L  |
| C | -1 | -5.09582900  | -5.06413600 | 7.13009000 L  |
| C | -1 | -5.21607500  | -5.08086500 | 5.73464700 L  |
| S | -1 | -4.44495100  | -3.04927900 | 0.71423600 L  |
| S | -1 | -6.58563200  | -6.02246600 | 5.02233600 L  |
| H | -1 | -8.17442300  | -4.90234500 | -1.23068000 L |
| H | -1 | -10.68806100 | -5.12433700 | 2.25496100 L  |
| H | -1 | -15.35109900 | -7.03136900 | 1.65679100 L  |
| H | -1 | -16.93570700 | -8.20884100 | 0.18900000 L  |
| H | -1 | -16.41859100 | -8.50311400 | -2.21159500 L |
| H | -1 | -14.40818500 | -7.49392900 | -3.17765600 L |
| H | -1 | -14.73840300 | -5.17632900 | -3.57477300 L |
| H | -1 | -14.56626400 | -4.66641100 | -5.97003900 L |
| H | -1 | -12.36923100 | -4.32236700 | -7.02492900 L |
| H | -1 | -10.32156400 | -4.54341100 | -5.70102300 L |
| H | -1 | -8.72252600  | -5.82053800 | 3.18902400 L  |
| H | -1 | -7.12727900  | -3.38841900 | 0.02129700 L  |
| H | -1 | -1.78676300  | -3.38380200 | -0.20867800 L |
| H | -1 | 0.18016400   | -4.61957600 | 0.63652400 L  |
| H | -1 | 0.07006000   | -5.76770700 | 2.82402400 L  |
| H | -1 | -1.97536600  | -5.66337400 | 4.17513400 L  |
| H | -1 | -2.55236600  | -3.07630700 | 4.99324300 L  |
| H | -1 | -2.39996600  | -3.02172400 | 7.44645500 L  |
| H | -1 | -3.98598300  | -4.33304200 | 8.81698000 L  |
| H | -1 | -5.79729100  | -5.61486500 | 7.74459400 L  |

|   |    |              |             |               |
|---|----|--------------|-------------|---------------|
| C | -1 | -18.41115200 | 1.31611700  | 9.58352300 L  |
| C | -1 | -17.84285900 | 0.92435300  | 10.80924100 L |
| C | -1 | -17.15332400 | 1.86182300  | 11.59968400 L |
| C | -1 | -17.04248100 | 3.19313200  | 11.15726100 L |
| C | -1 | -17.67212500 | 3.58881200  | 9.96387800 L  |
| C | -1 | -18.34583400 | 2.65438600  | 9.15008100 L  |
| C | -1 | -17.98191500 | -0.45945600 | 11.30558700 L |
| C | -1 | -15.42731100 | 3.64698800  | 13.07830200 L |
| C | -1 | -17.07126200 | 0.25356500  | 13.50606600 L |
| N | -1 | -16.56648200 | 1.45749700  | 12.86229900 L |
| C | -1 | -15.52845200 | 2.28870500  | 13.44794000 L |
| C | -1 | -17.68549700 | -0.74660600 | 12.72249500 L |
| C | -1 | -16.23233200 | 4.14704400  | 11.94450100 L |
| C | -1 | -14.53463200 | 4.49153900  | 13.76283000 L |
| C | -1 | -13.70345900 | 3.97841500  | 14.75930000 L |
| C | -1 | -13.70111500 | 2.61136700  | 15.02659500 L |
| C | -1 | -14.58414900 | 1.76576100  | 14.35332300 L |
| C | -1 | -17.04623400 | 0.08960800  | 14.90773200 L |
| C | -1 | -17.49452500 | -1.09538700 | 15.49351300 L |
| C | -1 | -17.99710700 | -2.12430600 | 14.69966200 L |
| C | -1 | -18.10945600 | -1.94814900 | 13.31967400 L |
| O | -1 | -18.39877900 | -1.33846800 | 10.57178800 L |
| O | -1 | -16.18567300 | 5.32516300  | 11.62814900 L |
| C | -1 | -18.95392600 | 3.07489000  | 7.84455100 L  |
| C | -1 | -18.38980400 | 4.13008800  | 7.10528300 L  |
| C | -1 | -18.97979700 | 4.58431600  | 5.92199000 L  |
| C | -1 | -20.10525900 | 3.92862300  | 5.40359800 L  |
| C | -1 | -20.62285500 | 2.80709500  | 6.07358500 L  |
| C | -1 | -20.08523800 | 2.42317300  | 7.31196300 L  |
| N | -1 | -20.70322800 | 4.38179600  | 4.18316200 L  |
| C | -1 | -20.73852600 | 5.78954500  | 3.88479300 L  |
| C | -1 | -21.11487100 | 3.40841200  | 3.20920800 L  |
| C | -1 | -21.70118900 | 2.19773500  | 3.62065200 L  |
| C | -1 | -22.08111500 | 1.24891100  | 2.66040700 L  |
| C | -1 | -21.83240800 | 1.47740600  | 1.30398600 L  |
| C | -1 | -21.21344000 | 2.66019200  | 0.89688600 L  |
| C | -1 | -20.86341600 | 3.62497000  | 1.84123100 L  |
| C | -1 | -21.86752600 | 6.36408200  | 3.27402700 L  |
| C | -1 | -21.87182800 | 7.72296600  | 2.94136500 L  |
| C | -1 | -20.73963900 | 8.50097400  | 3.16595300 L  |
| C | -1 | -19.61873100 | 7.93988700  | 3.77199000 L  |
| C | -1 | -19.63345300 | 6.60208000  | 4.17764700 L  |
| S | -1 | -21.97948000 | 1.81871900  | 5.37587900 L  |
| S | -1 | -18.19831100 | 5.97621700  | 5.06348700 L  |
| H | -1 | -18.90369200 | 0.57148100  | 8.97170900 L  |
| H | -1 | -17.63066200 | 4.63044600  | 9.67228700 L  |

|   |    |              |              |               |
|---|----|--------------|--------------|---------------|
| H | -1 | -14.47456200 | 5.54559000   | 13.52393200 L |
| H | -1 | -13.03122000 | 4.63446400   | 15.29678200 L |
| H | -1 | -13.01456100 | 2.20726200   | 15.75800900 L |
| H | -1 | -14.53650700 | 0.70534000   | 14.55056500 L |
| H | -1 | -16.69746000 | 0.87854100   | 15.55854800 L |
| H | -1 | -17.46380000 | -1.21016000  | 16.56729500 L |
| H | -1 | -18.34091400 | -3.04146800  | 15.16027800 L |
| H | -1 | -18.56651500 | -2.73076300  | 12.72707000 L |
| H | -1 | -17.48646400 | 4.61342300   | 7.44596900 L  |
| H | -1 | -20.55265100 | 1.60667400   | 7.84611600 L  |
| H | -1 | -22.53701300 | 0.31590800   | 2.96675100 L  |
| H | -1 | -22.10442300 | 0.73016700   | 0.57002600 L  |
| H | -1 | -20.99264800 | 2.82751700   | -0.14886000 L |
| H | -1 | -20.36147400 | 4.52543600   | 1.50961400 L  |
| H | -1 | -22.74379500 | 5.76221800   | 3.07043800 L  |
| H | -1 | -22.74647500 | 8.18325800   | 2.50962300 L  |
| H | -1 | -20.73852100 | 9.54150600   | 2.88573200 L  |
| H | -1 | -18.74395400 | 8.55243400   | 3.94634300 L  |
| C | -1 | -19.97781700 | -5.78047800  | 2.30707900 L  |
| C | -1 | -19.94965600 | -6.48009300  | 3.52572200 L  |
| C | -1 | -19.98686400 | -5.77013100  | 4.73631200 L  |
| C | -1 | -20.17625500 | -4.37974500  | 4.72364300 L  |
| C | -1 | -20.28500100 | -3.69936800  | 3.50403700 L  |
| C | -1 | -20.08049500 | -4.37559700  | 2.28349800 L  |
| C | -1 | -19.79059200 | -7.94807700  | 3.56493700 L  |
| C | -1 | -19.28777400 | -4.27926300  | 7.08715200 L  |
| C | -1 | -19.87191500 | -7.88351600  | 6.05320500 L  |
| N | -1 | -19.71597200 | -6.44663100  | 5.98619800 L  |
| C | -1 | -19.09882100 | -5.67697400  | 7.05112300 L  |
| C | -1 | -19.79482800 | -8.64575100  | 4.87085500 L  |
| C | -1 | -20.05330400 | -3.64569200  | 5.99686600 L  |
| C | -1 | -18.62975800 | -3.50505600  | 8.05689100 L  |
| C | -1 | -17.79020400 | -4.11637400  | 8.99196500 L  |
| C | -1 | -17.58329400 | -5.49347000  | 8.94943600 L  |
| C | -1 | -18.20583800 | -6.26608000  | 7.96985500 L  |
| C | -1 | -20.14131600 | -8.53614900  | 7.27267100 L  |
| C | -1 | -20.17419600 | -9.93052500  | 7.33512800 L  |
| C | -1 | -19.97426700 | -10.68615000 | 6.17947900 L  |
| C | -1 | -19.79765500 | -10.04879000 | 4.94970000 L  |
| O | -1 | -19.72092100 | -8.58304800  | 2.52653600 L  |
| O | -1 | -20.51624800 | -2.52410900  | 6.12378200 L  |
| C | -1 | -19.78628000 | -3.60897200  | 1.03048400 L  |
| C | -1 | -19.17468400 | -2.34814200  | 1.10860800 L  |
| C | -1 | -18.78289000 | -1.65408400  | -0.03499400 L |
| C | -1 | -18.92760900 | -2.24334700  | -1.30430800 L |
| C | -1 | -19.57761600 | -3.49044400  | -1.40320500 L |



|   |    |              |              |               |
|---|----|--------------|--------------|---------------|
| C | -1 | -20.00429300 | -4.15640900  | -0.24565900 L |
| N | -1 | -18.37421100 | -1.61187200  | -2.47231800 L |
| C | -1 | -18.32399900 | -0.16867100  | -2.57004800 L |
| C | -1 | -17.88912100 | -2.43025100  | -3.56253000 L |
| C | -1 | -18.59050600 | -3.58195000  | -3.96318200 L |
| C | -1 | -18.24135700 | -4.23388700  | -5.15454500 L |
| C | -1 | -17.17016500 | -3.77781400  | -5.92306000 L |
| C | -1 | -16.41877900 | -2.68592400  | -5.48982700 L |
| C | -1 | -16.75437400 | -2.03450100  | -4.30244400 L |
| C | -1 | -18.37657700 | 0.45623500   | -3.83224000 L |
| C | -1 | -18.20382500 | 1.83005000   | -3.95746600 L |
| C | -1 | -18.07614100 | 2.62242400   | -2.82186800 L |
| C | -1 | -18.07305100 | 2.03220700   | -1.56037100 L |
| C | -1 | -18.18258000 | 0.64208900   | -1.42624600 L |
| S | -1 | -19.95550300 | -4.26659200  | -2.99811500 L |
| S | -1 | -18.04923100 | -0.02567300  | 0.23994900 L  |
| H | -1 | -19.83134600 | -6.33164500  | 1.38938200 L  |
| H | -1 | -20.42519400 | -2.62685800  | 3.52007500 L  |
| H | -1 | -18.73951100 | -2.42808700  | 8.06870000 L  |
| H | -1 | -17.27224500 | -3.52189100  | 9.73186300 L  |
| H | -1 | -16.91697200 | -5.96264700  | 9.66001300 L  |
| H | -1 | -17.95057800 | -7.31461000  | 7.91281300 L  |
| H | -1 | -20.31349900 | -7.96769400  | 8.17806600 L  |
| H | -1 | -20.34658700 | -10.42536900 | 8.28233300 L  |
| H | -1 | -19.99291200 | -11.76737500 | 6.23067600 L  |
| H | -1 | -19.69615700 | -10.65066600 | 4.05913900 L  |
| H | -1 | -18.94722600 | -1.90313900  | 2.06620800 L  |
| H | -1 | -20.49814100 | -5.11150500  | -0.35477700 L |
| H | -1 | -18.80051000 | -5.09919600  | -5.48719200 L |
| H | -1 | -16.90980700 | -4.28316000  | -6.84469900 L |
| H | -1 | -15.58017400 | -2.33769400  | -6.07951900 L |
| H | -1 | -16.16098400 | -1.18407200  | -3.98879100 L |
| H | -1 | -18.51642000 | -0.12360300  | -4.73090100 L |
| H | -1 | -18.17654200 | 2.27718500   | -4.94039600 L |
| H | -1 | -17.96692500 | 3.69015400   | -2.92265900 L |
| H | -1 | -17.95800400 | 2.65666800   | -0.68339100 L |
| C | -1 | 9.27354900   | 12.09142100  | 5.57498700 L  |
| C | -1 | 8.92642300   | 13.37510100  | 6.02124000 L  |
| C | -1 | 8.80404400   | 14.42333200  | 5.09696900 L  |
| C | -1 | 8.99366000   | 14.17992000  | 3.72841200 L  |
| C | -1 | 9.24475500   | 12.87486200  | 3.28018300 L  |
| C | -1 | 9.40627900   | 11.81453300  | 4.19671900 L  |
| C | -1 | 8.62913700   | 13.64976900  | 7.44382700 L  |
| C | -1 | 9.12581500   | 16.68791000  | 3.36312100 L  |
| C | -1 | 7.76767000   | 15.89374500  | 6.80573000 L  |
| N | -1 | 8.48397100   | 15.75469400  | 5.55482500 L  |

|   |    |             |             |               |
|---|----|-------------|-------------|---------------|
| C | -1 | 8.90199000  | 16.87954400 | 4.74285000 L  |
| C | -1 | 7.88490200  | 14.88143800 | 7.78290800 L  |
| C | -1 | 8.97940200  | 15.32963000 | 2.80094600 L  |
| C | -1 | 9.55885600  | 17.76151200 | 2.56845600 L  |
| C | -1 | 9.78028500  | 19.01566300 | 3.13949000 L  |
| C | -1 | 9.60476400  | 19.19906400 | 4.51143900 L  |
| C | -1 | 9.18726200  | 18.13434000 | 5.31348400 L  |
| C | -1 | 6.86456200  | 16.95191600 | 7.02120900 L  |
| C | -1 | 6.14344500  | 17.03200800 | 8.21336400 L  |
| C | -1 | 6.33054800  | 16.07718500 | 9.21167700 L  |
| C | -1 | 7.19663300  | 15.00223800 | 9.00128800 L  |
| O | -1 | 8.93682500  | 12.84905500 | 8.31175000 L  |
| O | -1 | 8.89340900  | 15.15980400 | 1.59567400 L  |
| C | -1 | 9.70642200  | 10.42624800 | 3.72161800 L  |
| C | -1 | 10.37617300 | 10.19788800 | 2.51002800 L  |
| C | -1 | 10.63203300 | 8.89954300  | 2.05332000 L  |
| C | -1 | 10.31906400 | 7.78496100  | 2.85700800 L  |
| C | -1 | 9.64348700  | 8.01262500  | 4.07423000 L  |
| C | -1 | 9.31312600  | 9.30989800  | 4.47251600 L  |
| N | -1 | 10.70385300 | 6.44872600  | 2.46666600 L  |
| C | -1 | 10.81372100 | 6.08280800  | 1.06511500 L  |
| C | -1 | 11.00893200 | 5.47069300  | 3.49342500 L  |
| C | -1 | 10.29797400 | 5.43612200  | 4.70696700 L  |
| C | -1 | 10.49777100 | 4.38607300  | 5.61236400 L  |
| C | -1 | 11.43645500 | 3.39190100  | 5.34667100 L  |
| C | -1 | 12.19898700 | 3.45626000  | 4.18548900 L  |
| C | -1 | 12.00126800 | 4.49466700  | 3.27642700 L  |
| C | -1 | 10.60953900 | 4.74328700  | 0.65686000 L  |
| C | -1 | 10.82831700 | 4.34972000  | -0.66391400 L |
| C | -1 | 11.20617700 | 5.29058900  | -1.61598400 L |
| C | -1 | 11.35737900 | 6.62532500  | -1.24820100 L |
| C | -1 | 11.15174700 | 7.03036700  | 0.07828600 L  |
| S | -1 | 9.10215700  | 6.68967600  | 5.17238800 L  |
| S | -1 | 11.37194400 | 8.78142200  | 0.41607900 L  |
| H | -1 | 9.42616000  | 11.31283700 | 6.30963200 L  |
| H | -1 | 9.32629300  | 12.70093600 | 2.21655700 L  |
| H | -1 | 9.74186800  | 17.62602200 | 1.51394200 L  |
| H | -1 | 10.10610400 | 19.84111200 | 2.51993900 L  |
| H | -1 | 9.80791400  | 20.16392100 | 4.95728900 L  |
| H | -1 | 9.11206500  | 18.28565700 | 6.38061200 L  |
| H | -1 | 6.68871100  | 17.69663800 | 6.25715500 L  |
| H | -1 | 5.42661600  | 17.82896400 | 8.35778400 L  |
| H | -1 | 5.76414300  | 16.14471400 | 10.13006900 L |
| H | -1 | 7.28144600  | 14.23732600 | 9.76270600 L  |
| H | -1 | 10.70951400 | 11.02794900 | 1.90230700 L  |
| H | -1 | 8.74978900  | 9.43391500  | 5.38644400 L  |

|   |    |              |             |               |
|---|----|--------------|-------------|---------------|
| H | -1 | 9.92321500   | 4.34099600  | 6.52851400 L  |
| H | -1 | 11.57889000  | 2.57719600  | 6.04406000 L  |
| H | -1 | 12.94162600  | 2.70021200  | 3.98647900 L  |
| H | -1 | 12.61165100  | 4.52778900  | 2.38786700 L  |
| H | -1 | 10.28191500  | 3.99102400  | 1.36153000 L  |
| H | -1 | 10.69600300  | 3.31417200  | -0.94924700 L |
| H | -1 | 11.36967900  | 4.98888200  | -2.64220400 L |
| H | -1 | 11.63814500  | 7.35109100  | -2.00164200 L |
| C | -1 | -9.64042000  | 13.00121600 | -1.77122300 L |
| C | -1 | -9.87335900  | 14.17080000 | -2.51579000 L |
| C | -1 | -10.72533100 | 15.16409800 | -1.99893700 L |
| C | -1 | -11.22685900 | 15.03467200 | -0.68760100 L |
| C | -1 | -10.99610600 | 13.85533700 | 0.04185800 L  |
| C | -1 | -10.26019200 | 12.80952200 | -0.52773200 L |
| C | -1 | -9.30237100  | 14.34326600 | -3.86880000 L |
| C | -1 | -12.79681200 | 16.97376700 | -1.12458000 L |
| C | -1 | -10.41176100 | 16.56906500 | -4.04693100 L |
| N | -1 | -11.15430300 | 16.26929900 | -2.83407500 L |
| C | -1 | -12.38673200 | 16.95451400 | -2.47524400 L |
| C | -1 | -9.58455100  | 15.58108300 | -4.62451600 L |
| C | -1 | -12.11126000 | 16.09035000 | -0.16372700 L |
| C | -1 | -13.93727800 | 17.69930300 | -0.74556600 L |
| C | -1 | -14.73460000 | 18.30402700 | -1.71573600 L |
| C | -1 | -14.40817900 | 18.18614100 | -3.06572400 L |
| C | -1 | -13.24671100 | 17.51031500 | -3.44809700 L |
| C | -1 | -10.47038800 | 17.84025100 | -4.65560700 L |
| C | -1 | -9.88133200  | 18.05755300 | -5.90274400 L |
| C | -1 | -9.19102200  | 17.02682100 | -6.53669100 L |
| C | -1 | -9.00772100  | 15.80486000 | -5.88864500 L |
| O | -1 | -8.56775900  | 13.49034500 | -4.34036800 L |
| O | -1 | -12.32184200 | 16.18634100 | 1.03416000 L  |
| C | -1 | -10.36803800 | 11.44247000 | 0.02198000 L  |
| C | -1 | -9.79112700  | 11.07510500 | 1.24277200 L  |
| C | -1 | -9.94710800  | 9.76634400  | 1.73316100 L  |
| C | -1 | -10.63628900 | 8.79914400  | 0.96727800 L  |
| C | -1 | -11.19935700 | 9.17751200  | -0.26223200 L |
| C | -1 | -11.10572500 | 10.49734100 | -0.69335700 L |
| N | -1 | -10.81312000 | 7.46085100  | 1.45952600 L  |
| C | -1 | -11.04530200 | 7.26372900  | 2.86761300 L  |
| C | -1 | -10.85132800 | 6.34413100  | 0.54124000 L  |
| C | -1 | -11.38232000 | 6.49165500  | -0.75339400 L |
| C | -1 | -11.43128900 | 5.39386600  | -1.62216800 L |
| C | -1 | -11.01316000 | 4.13417900  | -1.19557400 L |
| C | -1 | -10.50531500 | 3.97076100  | 0.09134100 L  |
| C | -1 | -10.38881800 | 5.07372000  | 0.94166100 L  |
| C | -1 | -11.95755700 | 6.28311600  | 3.30689100 L  |

|   |    |              |              |               |
|---|----|--------------|--------------|---------------|
| C | -1 | -12.13406100 | 6.03909300   | 4.66734100 L  |
| C | -1 | -11.43974100 | 6.79949800   | 5.60615300 L  |
| C | -1 | -10.57025700 | 7.80662300   | 5.18546900 L  |
| C | -1 | -10.37377400 | 8.05140400   | 3.82132000 L  |
| S | -1 | -12.11270800 | 8.03816100   | -1.32588000 L |
| S | -1 | -9.23432000  | 9.38023300   | 3.35353100 L  |
| H | -1 | -9.04797100  | 12.19881000  | -2.19408400 L |
| H | -1 | -11.48383200 | 13.70523400  | 0.99780200 L  |
| H | -1 | -14.25406500 | 17.73443000  | 0.28948600 L  |
| H | -1 | -15.63667300 | 18.81399100  | -1.42133400 L |
| H | -1 | -15.06449800 | 18.60667300  | -3.81749000 L |
| H | -1 | -13.04377700 | 17.39925800  | -4.50446500 L |
| H | -1 | -10.98413000 | 18.66313400  | -4.17798800 L |
| H | -1 | -9.97112600  | 19.02272900  | -6.38515000 L |
| H | -1 | -8.77789000  | 17.18516900  | -7.52071600 L |
| H | -1 | -8.41269000  | 15.04013800  | -6.37327700 L |
| H | -1 | -9.25544000  | 11.81173500  | 1.82878200 L  |
| H | -1 | -11.61882800 | 10.79056700  | -1.59619500 L |
| H | -1 | -11.80865500 | 5.51403500   | -2.62924800 L |
| H | -1 | -11.08518500 | 3.28547400   | -1.86256100 L |
| H | -1 | -10.18590500 | 2.99172600   | 0.42562700 L  |
| H | -1 | -9.95471500  | 4.93130000   | 1.92297600 L  |
| H | -1 | -12.52804400 | 5.69970000   | 2.59534300 L  |
| H | -1 | -12.81133100 | 5.26060500   | 4.99133900 L  |
| H | -1 | -11.58465300 | 6.61652000   | 6.65998400 L  |
| H | -1 | -10.05638200 | 8.40822800   | 5.92192000 L  |
| C | -1 | 5.20534600   | -11.96297200 | 1.77773000 L  |
| C | -1 | 4.57531600   | -11.26952900 | 0.72250400 L  |
| C | -1 | 3.20099500   | -11.46556300 | 0.47517500 L  |
| C | -1 | 2.44780900   | -12.25874900 | 1.36021500 L  |
| C | -1 | 3.08195500   | -12.93507300 | 2.40894600 L  |
| C | -1 | 4.46864200   | -12.83808700 | 2.58959500 L  |
| C | -1 | 5.33247300   | -10.34916500 | -0.14703100 L |
| C | -1 | 0.47953500   | -12.13851200 | -0.22808700 L |
| C | -1 | 3.25454600   | -9.84229200  | -1.43237400 L |
| N | -1 | 2.57249400   | -10.90159500 | -0.70496100 L |
| C | -1 | 1.32255000   | -11.49507100 | -1.15965400 L |
| C | -1 | 4.63727400   | -9.63140200  | -1.23436300 L |
| C | -1 | 1.00944400   | -12.44541100 | 1.11078600 L  |
| C | -1 | -0.77332900  | -12.62979000 | -0.63090800 L |
| C | -1 | -1.14193400  | -12.58903400 | -1.97471200 L |
| C | -1 | -0.24937400  | -12.09292900 | -2.92461000 L |
| C | -1 | 0.97821400   | -11.56050700 | -2.52601100 L |
| C | -1 | 2.56821700   | -8.99542400  | -2.32776500 L |
| C | -1 | 3.27215800   | -8.12670800  | -3.16175900 L |
| C | -1 | 4.65768200   | -8.02439400  | -3.05582500 L |

|   |    |              |              |               |
|---|----|--------------|--------------|---------------|
| C | -1 | 5.33333000   | -8.73142600  | -2.06253000 L |
| O | -1 | 6.51629300   | -10.14522600 | 0.06004900 L  |
| O | -1 | 0.29214500   | -12.93455400 | 1.96748400 L  |
| C | -1 | 5.12290000   | -13.69337600 | 3.60823400 L  |
| C | -1 | 4.80321900   | -15.05554600 | 3.66711800 L  |
| C | -1 | 5.18915300   | -15.83193300 | 4.75793100 L  |
| C | -1 | 5.97416000   | -15.26920000 | 5.77992000 L  |
| C | -1 | 6.38524600   | -13.92590400 | 5.68105500 L  |
| C | -1 | 5.95582300   | -13.14688800 | 4.59355800 L  |
| N | -1 | 6.27635400   | -16.04141500 | 6.94852800 L  |
| C | -1 | 5.25293100   | -16.89774300 | 7.49245200 L  |
| C | -1 | 7.52366000   | -15.85289500 | 7.63663800 L  |
| C | -1 | 8.06327600   | -14.56568000 | 7.79310600 L  |
| C | -1 | 9.19392600   | -14.38380200 | 8.60090700 L  |
| C | -1 | 9.84553100   | -15.48190900 | 9.16686700 L  |
| C | -1 | 9.35046100   | -16.76965800 | 8.95807900 L  |
| C | -1 | 8.18888800   | -16.95545800 | 8.20534700 L  |
| C | -1 | 5.05796900   | -16.98578400 | 8.88452800 L  |
| C | -1 | 4.01983300   | -17.76058800 | 9.40571600 L  |
| C | -1 | 3.16172400   | -18.44557300 | 8.54566900 L  |
| C | -1 | 3.35826100   | -18.38190200 | 7.16515100 L  |
| C | -1 | 4.39136600   | -17.60339000 | 6.63374800 L  |
| S | -1 | 7.33378500   | -13.10817700 | 6.99857800 L  |
| S | -1 | 4.58281700   | -17.53758000 | 4.83689500 L  |
| H | -1 | 6.27099500   | -11.85961500 | 1.94125900 L  |
| H | -1 | 2.50130500   | -13.57158800 | 3.06668900 L  |
| H | -1 | -1.43362100  | -13.10781300 | 0.08038100 L  |
| H | -1 | -2.09557800  | -12.99494200 | -2.28543300 L |
| H | -1 | -0.50063200  | -12.13188400 | -3.97444500 L |
| H | -1 | 1.66671900   | -11.23187900 | -3.29200700 L |
| H | -1 | 1.49044500   | -9.02039300  | -2.40731100 L |
| H | -1 | 2.74012300   | -7.53456100  | -3.89361700 L |
| H | -1 | 5.20433700   | -7.37080600  | -3.72172600 L |
| H | -1 | 6.39987400   | -8.58373900  | -1.95049900 L |
| H | -1 | 4.19628700   | -15.50181200 | 2.89016500 L  |
| H | -1 | 6.22367700   | -12.10265200 | 4.54099400 L  |
| H | -1 | 9.57933400   | -13.38899600 | 8.78068600 L  |
| H | -1 | 10.73767100  | -15.33249200 | 9.76057200 L  |
| H | -1 | 9.85825500   | -17.62273000 | 9.38973800 L  |
| H | -1 | 7.80339900   | -17.95800100 | 8.06610500 L  |
| H | -1 | 5.68808700   | -16.42872500 | 9.56600800 L  |
| H | -1 | 3.87559100   | -17.82305600 | 10.47673300 L |
| H | -1 | 2.34625300   | -19.03047400 | 8.94915500 L  |
| H | -1 | 2.69343300   | -18.92272800 | 6.50532300 L  |
| C | -1 | -11.36224600 | -8.83476200  | -3.59894600 L |
| C | -1 | -11.02113700 | -8.28434200  | -4.83862100 L |

|   |    |              |              |               |
|---|----|--------------|--------------|---------------|
| C | -1 | -9.68864300  | -7.92080700  | -5.10379300 L |
| C | -1 | -8.69186900  | -8.20695600  | -4.14823800 L |
| C | -1 | -9.04546800  | -8.76905800  | -2.90858200 L |
| C | -1 | -10.38995100 | -9.04526200  | -2.61158500 L |
| C | -1 | -12.05743500 | -8.02732900  | -5.85235600 L |
| C | -1 | -7.06646600  | -6.76952900  | -5.45866300 L |
| C | -1 | -10.30945700 | -7.19191800  | -7.41448100 L |
| N | -1 | -9.36131500  | -7.17764100  | -6.30670000 L |
| C | -1 | -8.12616200  | -6.40399000  | -6.31903900 L |
| C | -1 | -11.65088000 | -7.57501400  | -7.19035600 L |
| C | -1 | -7.30586300  | -7.79056100  | -4.42280400 L |
| C | -1 | -5.84631500  | -6.07442900  | -5.50899400 L |
| C | -1 | -5.70307200  | -4.96259200  | -6.33700200 L |
| C | -1 | -6.78097100  | -4.52352300  | -7.10292900 L |
| C | -1 | -7.98876800  | -5.22368800  | -7.08086900 L |
| C | -1 | -9.91344900  | -6.90806100  | -8.73456400 L |
| C | -1 | -10.82896200 | -6.94041700  | -9.78528100 L |
| C | -1 | -12.15678100 | -7.27794900  | -9.54536700 L |
| C | -1 | -12.57097800 | -7.58535200  | -8.25239000 L |
| O | -1 | -13.23624900 | -8.21085400  | -5.59491400 L |
| O | -1 | -6.38232400  | -8.23285700  | -3.75967500 L |
| C | -1 | -10.81781600 | -9.44932400  | -1.24925400 L |
| C | -1 | -10.27463300 | -8.83585500  | -0.11477700 L |
| C | -1 | -10.83497500 | -9.04387100  | 1.15253200 L  |
| C | -1 | -11.96432200 | -9.87128200  | 1.30067600 L  |
| C | -1 | -12.41675600 | -10.59070700 | 0.17675700 L  |
| C | -1 | -11.86415500 | -10.36117600 | -1.08046000 L |
| N | -1 | -12.72891300 | -9.89574700  | 2.52434000 L  |
| C | -1 | -12.12269100 | -9.60423900  | 3.80654700 L  |
| C | -1 | -14.16761100 | -10.02942300 | 2.41547000 L  |
| C | -1 | -14.73588700 | -10.87708100 | 1.44463700 L  |
| C | -1 | -16.12155300 | -10.99163100 | 1.33417800 L  |
| C | -1 | -16.95743700 | -10.27989400 | 2.18974400 L  |
| C | -1 | -16.41351700 | -9.41918200  | 3.13936800 L  |
| C | -1 | -15.02986700 | -9.27458800  | 3.23914000 L  |
| C | -1 | -12.70271100 | -10.09928600 | 4.99714300 L  |
| C | -1 | -12.25757000 | -9.66021600  | 6.24704400 L  |
| C | -1 | -11.19299200 | -8.77015700  | 6.33185600 L  |
| C | -1 | -10.56219100 | -8.33509700  | 5.17143600 L  |
| C | -1 | -11.00289400 | -8.75871900  | 3.91360200 L  |
| S | -1 | -13.73056000 | -11.81754700 | 0.28790300 L  |
| S | -1 | -10.07050200 | -8.14158000  | 2.50632000 L  |
| H | -1 | -12.40156200 | -9.04439600  | -3.38207300 L |
| H | -1 | -8.28310800  | -8.94103700  | -2.15803800 L |
| H | -1 | -5.01233200  | -6.37869300  | -4.89362400 L |
| H | -1 | -4.76464600  | -4.42362600  | -6.36163900 L |

|   |    |              |              |                |
|---|----|--------------|--------------|----------------|
| H | -1 | -6.68583200  | -3.63101900  | -7.70751200 L  |
| H | -1 | -8.82005900  | -4.81684000  | -7.63855600 L  |
| H | -1 | -8.89294700  | -6.68168000  | -8.96598600 L  |
| H | -1 | -10.49980800 | -6.72041900  | -10.78885500 L |
| H | -1 | -12.86048300 | -7.32367800  | -10.36380600 L |
| H | -1 | -13.60154300 | -7.86084600  | -8.08554500 L  |
| H | -1 | -9.45800700  | -8.13213600  | -0.21969000 L  |
| H | -1 | -12.28113500 | -10.87499600 | -1.93703200 L  |
| H | -1 | -16.55248200 | -11.62095600 | 0.56607500 L   |
| H | -1 | -18.02598400 | -10.38510600 | 2.09908700 L   |
| H | -1 | -17.06306500 | -8.84997900  | 3.78624600 L   |
| H | -1 | -14.63611900 | -8.55951400  | 3.94909300 L   |
| H | -1 | -13.53086700 | -10.79514100 | 4.95918400 L   |
| H | -1 | -12.74265500 | -10.00157000 | 7.15158100 L   |
| H | -1 | -10.84330500 | -8.42764700  | 7.29462100 L   |
| H | -1 | -9.71273100  | -7.67135600  | 5.24927500 L   |
| C | -1 | 1.73146000   | 12.65074800  | -0.92611300 L  |
| C | -1 | 0.52789700   | 11.95993700  | -0.77336600 L  |
| C | -1 | -0.66727100  | 12.51814200  | -1.24616000 L  |
| C | -1 | -0.66625400  | 13.78934200  | -1.83506400 L  |
| C | -1 | 0.55119600   | 14.46495300  | -2.02360700 L  |
| C | -1 | 1.76226700   | 13.87879800  | -1.60469000 L  |
| C | -1 | 0.51036600   | 10.54937000  | -0.36628600 L  |
| C | -1 | -3.20717800  | 13.66414600  | -1.93012700 L  |
| C | -1 | -1.67541100  | 10.28399500  | -1.47955800 L  |
| N | -1 | -1.86017300  | 11.70685200  | -1.29025300 L  |
| C | -1 | -3.14332800  | 12.36234100  | -1.39405600 L  |
| C | -1 | -0.49702100  | 9.68158700   | -0.99011300 L  |
| C | -1 | -1.94729300  | 14.31853600  | -2.34296100 L  |
| C | -1 | -4.44539700  | 14.32093300  | -2.02824500 L  |
| C | -1 | -5.60879300  | 13.69360800  | -1.57251500 L  |
| C | -1 | -5.54500500  | 12.41102500  | -1.02115100 L  |
| C | -1 | -4.31773200  | 11.74923700  | -0.92307700 L  |
| C | -1 | -2.51178300  | 9.54964800   | -2.33555600 L  |
| C | -1 | -2.17734500  | 8.24418800   | -2.68892500 L  |
| C | -1 | -1.03850300  | 7.63667400   | -2.15921900 L  |
| C | -1 | -0.19645000  | 8.35092200   | -1.30827100 L  |
| O | -1 | 1.33860200   | 10.10429600  | 0.40466200 L   |
| O | -1 | -1.96389000  | 15.26025100  | -3.11269900 L  |
| C | -1 | 3.05978300   | 14.45241500  | -2.03373500 L  |
| C | -1 | 3.26652200   | 15.83513100  | -2.03309300 L  |
| C | -1 | 4.41342900   | 16.38248800  | -2.61415900 L  |
| C | -1 | 5.40383000   | 15.54351500  | -3.16688300 L  |
| C | -1 | 5.24687600   | 14.14975800  | -3.06598800 L  |
| C | -1 | 4.06907800   | 13.61637700  | -2.53598000 L  |
| N | -1 | 6.51552200   | 16.10660700  | -3.88513100 L  |

|   |    |             |             |               |
|---|----|-------------|-------------|---------------|
| C | -1 | 6.30297700  | 17.31278200 | -4.65206700 L |
| C | -1 | 7.80688500  | 15.45451100 | -3.86991000 L |
| C | -1 | 7.91912700  | 14.05656200 | -3.74697100 L |
| C | -1 | 9.18454200  | 13.45044600 | -3.75322200 L |
| C | -1 | 10.34126300 | 14.22384600 | -3.85335300 L |
| C | -1 | 10.24142800 | 15.60722800 | -3.97545100 L |
| C | -1 | 8.98587800  | 16.21580600 | -3.98808100 L |
| C | -1 | 6.92216600  | 17.48178600 | -5.90582700 L |
| C | -1 | 6.72303600  | 18.64852100 | -6.64732700 L |
| C | -1 | 5.90850900  | 19.66071200 | -6.14505900 L |
| C | -1 | 5.30699500  | 19.51471100 | -4.89571200 L |
| C | -1 | 5.46524200  | 18.33344100 | -4.16626400 L |
| S | -1 | 6.48280100  | 12.97012300 | -3.65142500 L |
| S | -1 | 4.55966100  | 18.18210400 | -2.61316200 L |
| H | -1 | 2.65530300  | 12.17900800 | -0.62284000 L |
| H | -1 | 0.56256100  | 15.40333900 | -2.56532400 L |
| H | -1 | -4.50857200 | 15.32522000 | -2.42933200 L |
| H | -1 | -6.55924400 | 14.20794300 | -1.63273200 L |
| H | -1 | -6.44694800 | 11.93217200 | -0.66155800 L |
| H | -1 | -4.28104200 | 10.76662800 | -0.46980100 L |
| H | -1 | -3.37310100 | 10.00851000 | -2.80114000 L |
| H | -1 | -2.78750700 | 7.71798700  | -3.40241700 L |
| H | -1 | -0.79398600 | 6.61924700  | -2.42895700 L |
| H | -1 | 0.71740400  | 7.88937200  | -0.95580000 L |
| H | -1 | 2.51462600  | 16.49462800 | -1.61682800 L |
| H | -1 | 3.93063400  | 12.54149100 | -2.55132000 L |
| H | -1 | 9.27453300  | 12.37412000 | -3.67419400 L |
| H | -1 | 11.31355900 | 13.75006900 | -3.84125100 L |
| H | -1 | 11.13576500 | 16.21016900 | -4.06557700 L |
| H | -1 | 8.93166100  | 17.28628400 | -4.10230700 L |
| H | -1 | 7.56083300  | 16.70728600 | -6.30585400 L |
| H | -1 | 7.20259900  | 18.77099000 | -7.60935400 L |
| H | -1 | 5.74571100  | 20.56052100 | -6.72217100 L |
| H | -1 | 4.69828300  | 20.31345000 | -4.49834400 L |
| C | -1 | -4.08041200 | 1.98401600  | 10.47301300 L |
| C | -1 | -4.48872200 | 1.79021100  | 11.79700300 L |
| C | -1 | -3.71629400 | 0.99221900  | 12.65771200 L |
| C | -1 | -2.54195400 | 0.38539900  | 12.17569800 L |
| C | -1 | -2.11532100 | 0.62822200  | 10.86242200 L |
| C | -1 | -2.87293500 | 1.43657900  | 10.00514100 L |
| C | -1 | -5.70215800 | 2.44099600  | 12.32285600 L |
| C | -1 | -2.37139800 | -0.91513500 | 14.35253100 L |
| C | -1 | -5.04286700 | 1.75690400  | 14.62026300 L |
| N | -1 | -4.13785000 | 0.78647300  | 14.02559900 L |
| C | -1 | -3.60416800 | -0.35340600 | 14.74849300 L |
| C | -1 | -5.87340600 | 2.53554600  | 13.78191600 L |



|   |    |             |             |               |
|---|----|-------------|-------------|---------------|
| C | -1 | -1.79633400 | -0.53365000 | 13.05130300 L |
| C | -1 | -1.80111600 | -1.95669000 | 15.10243600 L |
| C | -1 | -2.53959400 | -2.57390500 | 16.10896600 L |
| C | -1 | -3.82680800 | -2.12587800 | 16.40382500 L |
| C | -1 | -4.34500400 | -1.00036100 | 15.75442000 L |
| C | -1 | -5.02303300 | 2.03954400  | 16.00140900 L |
| C | -1 | -5.85638400 | 3.02765700  | 16.53620300 L |
| C | -1 | -6.72164200 | 3.74094000  | 15.70594200 L |
| C | -1 | -6.74106700 | 3.49064600  | 14.33569300 L |
| O | -1 | -6.51453600 | 2.94980200  | 11.56724700 L |
| O | -1 | -0.77601800 | -1.06719100 | 12.65044100 L |
| C | -1 | -2.39406100 | 1.75305400  | 8.63808600 L  |
| C | -1 | -1.70674100 | 0.81189700  | 7.85609600 L  |
| C | -1 | -1.32750900 | 1.11461900  | 6.54086700 L  |
| C | -1 | -1.68744300 | 2.35323300  | 5.97318700 L  |
| C | -1 | -2.27236500 | 3.32940500  | 6.80194000 L  |
| C | -1 | -2.61670600 | 3.02719700  | 8.11261100 L  |
| N | -1 | -1.56358700 | 2.59526000  | 4.55818500 L  |
| C | -1 | -0.47823900 | 2.00093500  | 3.80275800 L  |
| C | -1 | -2.57960100 | 3.41681000  | 3.92613000 L  |
| C | -1 | -3.14966100 | 4.51239100  | 4.60825100 L  |
| C | -1 | -4.19355000 | 5.24448000  | 4.03496500 L  |
| C | -1 | -4.68255000 | 4.89654400  | 2.78188600 L  |
| C | -1 | -4.08587700 | 3.86283800  | 2.07195600 L  |
| C | -1 | -3.06238600 | 3.11096100  | 2.64341500 L  |
| C | -1 | -0.02727300 | 2.60044200  | 2.60691800 L  |
| C | -1 | 1.10887600  | 2.12908100  | 1.95013400 L  |
| C | -1 | 1.80491100  | 1.04021900  | 2.46229700 L  |
| C | -1 | 1.33062800  | 0.38070700  | 3.59277600 L  |
| C | -1 | 0.19459300  | 0.84874200  | 4.26641300 L  |
| S | -1 | -2.59137600 | 5.00816900  | 6.23673900 L  |
| S | -1 | -0.39256400 | -0.14780100 | 5.65303000 L  |
| H | -1 | -4.69753800 | 2.57954800  | 9.81249600 L  |
| H | -1 | -1.18498600 | 0.19844300  | 10.51558800 L |
| H | -1 | -0.83373100 | -2.36598200 | 14.83713700 L |
| H | -1 | -2.13706800 | -3.44447100 | 16.60796300 L |
| H | -1 | -4.42388600 | -2.65264100 | 17.13624600 L |
| H | -1 | -5.34303200 | -0.66749700 | 16.00355800 L |
| H | -1 | -4.33102500 | 1.53532400  | 16.66169400 L |
| H | -1 | -5.81778600 | 3.25811200  | 17.59312600 L |
| H | -1 | -7.34449000 | 4.52440900  | 16.11489200 L |
| H | -1 | -7.38705800 | 4.08739100  | 13.70240400 L |
| H | -1 | -1.48041900 | -0.16862800 | 8.25674300 L  |
| H | -1 | -3.08645100 | 3.78733000  | 8.71710700 L  |
| H | -1 | -4.63810800 | 6.07514400  | 4.56863900 L  |
| H | -1 | -5.50979200 | 5.44006800  | 2.35080400 L  |

|   |    |             |             |                |
|---|----|-------------|-------------|----------------|
| H | -1 | -4.39186300 | 3.66605000  | 1.05857200 L   |
| H | -1 | -2.63017100 | 2.31258200  | 2.06714600 L   |
| H | -1 | -0.48887600 | 3.50094400  | 2.22872600 L   |
| H | -1 | 1.46893500  | 2.63280900  | 1.06252300 L   |
| H | -1 | 2.70547400  | 0.69825800  | 1.97517500 L   |
| H | -1 | 1.85509900  | -0.49607400 | 3.95128700 L   |
| C | -1 | 9.92255500  | 3.89936200  | -10.38453700 L |
| C | -1 | 8.92263700  | 4.14510400  | -9.43767700 L  |
| C | -1 | 8.68051300  | 3.20559900  | -8.42328300 L  |
| C | -1 | 9.50812100  | 2.07503700  | -8.30384400 L  |
| C | -1 | 10.55682600 | 1.87555200  | -9.21206400 L  |
| C | -1 | 10.73856300 | 2.75602600  | -10.29271300 L |
| C | -1 | 8.09166200  | 5.36269100  | -9.50182300 L  |
| C | -1 | 7.80496400  | 1.04543300  | -6.74085200 L  |
| C | -1 | 6.98930400  | 4.69794800  | -7.37082400 L  |
| N | -1 | 7.54771900  | 3.36923600  | -7.54183900 L  |
| C | -1 | 6.98065500  | 2.17552600  | -6.94009400 L  |
| C | -1 | 7.19716000  | 5.67371500  | -8.37125500 L  |
| C | -1 | 9.17317300  | 1.05831800  | -7.29076000 L  |
| C | -1 | 7.28325500  | -0.10902600 | -6.13700700 L  |
| C | -1 | 5.93627100  | -0.16481500 | -5.78441300 L  |
| C | -1 | 5.09265800  | 0.91070700  | -6.06406200 L  |
| C | -1 | 5.60595300  | 2.07183000  | -6.64829300 L  |
| C | -1 | 6.28032200  | 5.05855700  | -6.20943000 L  |
| C | -1 | 5.68780700  | 6.31731700  | -6.10428300 L  |
| C | -1 | 5.81073000  | 7.23717800  | -7.14411500 L  |
| C | -1 | 6.57938800  | 6.92987600  | -8.26498900 L  |
| O | -1 | 8.17048300  | 6.11950800  | -10.45631500 L |
| O | -1 | 9.98698000  | 0.20933300  | -6.96499000 L  |
| C | -1 | 11.65579300 | 2.41464100  | -11.41107400 L |
| C | -1 | 11.81556100 | 1.07876900  | -11.81867000 L |
| C | -1 | 12.45547300 | 0.76787300  | -13.02111200 L |
| C | -1 | 12.85472600 | 1.80454400  | -13.87997200 L |
| C | -1 | 12.75723000 | 3.13817200  | -13.44866600 L |
| C | -1 | 12.23064900 | 3.42919200  | -12.19194600 L |
| N | -1 | 13.23541400 | 1.52383400  | -15.22951000 L |
| C | -1 | 13.98071700 | 0.33726000  | -15.53984700 L |
| C | -1 | 12.71723600 | 2.37136500  | -16.27355800 L |
| C | -1 | 12.62211700 | 3.75874500  | -16.07065000 L |
| C | -1 | 12.06388600 | 4.57382000  | -17.06133500 L |
| C | -1 | 11.54451900 | 4.01148000  | -18.22791700 L |
| C | -1 | 11.62440600 | 2.63328600  | -18.43283600 L |
| C | -1 | 12.22149200 | 1.81700400  | -17.46906700 L |
| C | -1 | 14.94265200 | 0.36590800  | -16.56275300 L |
| C | -1 | 15.59628900 | -0.80250600 | -16.94713700 L |
| C | -1 | 15.28169900 | -2.01391300 | -16.33121300 L |

|   |    |             |             |                |
|---|----|-------------|-------------|----------------|
| C | -1 | 14.37033200 | -2.04305300 | -15.27658200 L |
| C | -1 | 13.73922200 | -0.86692000 | -14.85478800 L |
| S | -1 | 13.18091600 | 4.52590200  | -14.53084500 L |
| S | -1 | 12.60233300 | -0.98520900 | -13.45551700 L |
| H | -1 | 10.02126500 | 4.57568700  | -11.22373800 L |
| H | -1 | 11.18569100 | 0.99948000  | -9.11279000 L  |
| H | -1 | 7.90661300  | -0.97863900 | -5.97089600 L  |
| H | -1 | 5.54691800  | -1.05087600 | -5.30891900 L  |
| H | -1 | 4.04098000  | 0.84887500  | -5.81762500 L  |
| H | -1 | 4.92378700  | 2.87698800  | -6.88408200 L  |
| H | -1 | 6.17544500  | 4.37018100  | -5.38561000 L  |
| H | -1 | 5.11799500  | 6.57157000  | -5.22298000 L  |
| H | -1 | 5.30957200  | 8.18900700  | -7.08386500 L  |
| H | -1 | 6.69805100  | 7.67521900  | -9.04161700 L  |
| H | -1 | 11.38021800 | 0.27101400  | -11.24585100 L |
| H | -1 | 12.17784300 | 4.46328200  | -11.87632900 L |
| H | -1 | 11.99839800 | 5.64070600  | -16.91150800 L |
| H | -1 | 11.08390500 | 4.64543000  | -18.97476600 L |
| H | -1 | 11.22309700 | 2.19741700  | -19.33856500 L |
| H | -1 | 12.25720800 | 0.74824400  | -17.63664100 L |
| H | -1 | 15.18074900 | 1.29453300  | -17.06482700 L |
| H | -1 | 16.34133000 | -0.76374300 | -17.72594700 L |
| H | -1 | 15.75063800 | -2.92953400 | -16.66117100 L |
| H | -1 | 14.15792500 | -2.98328400 | -14.78348900 L |
| C | 0  | 1.19947800  | -1.47639000 | 0.39485000 H   |
| C | 0  | 2.59954800  | -1.48802400 | 0.30289900 H   |
| C | 0  | 3.24809700  | -0.52736900 | -0.52169900 H  |
| C | 0  | 2.47676000  | 0.40135400  | -1.27654300 H  |
| C | 0  | 1.07590400  | 0.35879500  | -1.17999100 H  |
| C | 0  | 0.42968700  | -0.53279300 | -0.30817800 H  |
| C | 0  | 3.35988500  | -2.41326000 | 1.13153400 H   |
| C | 0  | 4.56907400  | 1.37205000  | -2.16218300 H  |
| C | 0  | 5.37807100  | -1.05915200 | 0.50449600 H   |
| N | 0  | 4.62964700  | -0.44801700 | -0.53820300 H  |
| C | 0  | 5.28026300  | 0.32103000  | -1.54090400 H  |
| C | 0  | 4.79044700  | -2.10945500 | 1.24666100 H   |
| C | 0  | 3.11415700  | 1.48659700  | -2.01307400 H  |
| C | 0  | 5.27522700  | 2.26314900  | -2.98661100 H  |
| C | 0  | 6.61774300  | 2.06309600  | -3.26227700 H  |
| C | 0  | 7.26526500  | 0.91757400  | -2.78297100 H  |
| C | 0  | 6.59871700  | 0.04628900  | -1.93384500 H  |
| C | 0  | 6.64500700  | -0.57657100 | 0.87113500 H   |
| C | 0  | 7.37892900  | -1.22133900 | 1.85349200 H   |
| C | 0  | 6.85565800  | -2.35003300 | 2.49218100 H   |
| C | 0  | 5.56855200  | -2.77091000 | 2.21006000 H   |
| O | 0  | 2.81684600  | -3.30711600 | 1.79927600 H   |

|   |    |              |             |               |
|---|----|--------------|-------------|---------------|
| O | 0  | 2.46520200   | 2.40953900  | -2.53299800 H |
| C | 0  | -1.00146400  | -0.37640700 | -0.02293900 H |
| C | 0  | -1.91809300  | 0.08911500  | -0.98145200 H |
| C | 0  | -3.25079700  | 0.30183500  | -0.65888400 H |
| C | 0  | -3.71415800  | 0.13851300  | 0.66303900 H  |
| C | 0  | -2.78662000  | -0.30644600 | 1.62803800 H  |
| C | 0  | -1.48081800  | -0.60282200 | 1.27819300 H  |
| N | 0  | -5.05039400  | 0.40851400  | 1.00463800 H  |
| C | 0  | -5.75596000  | 1.45190500  | 0.34065400 H  |
| C | 0  | -5.67089400  | -0.26514100 | 2.09851700 H  |
| C | 0  | -4.93812000  | -0.64057200 | 3.23099300 H  |
| C | 0  | -5.57255900  | -1.27448900 | 4.29673500 H  |
| C | 0  | -6.92388500  | -1.57039400 | 4.23565300 H  |
| C | 0  | -7.65631100  | -1.23850500 | 3.09771900 H  |
| C | 0  | -7.03085000  | -0.59410100 | 2.03937800 H  |
| C | 0  | -6.63602900  | 2.27518800  | 1.05524700 H  |
| C | 0  | -7.22862300  | 3.36902300  | 0.44384200 H  |
| C | 0  | -6.97955600  | 3.65340200  | -0.89635500 H |
| C | 0  | -6.10030400  | 2.85026700  | -1.61027000 H |
| C | 0  | -5.49591000  | 1.74811900  | -1.00433900 H |
| S | 0  | -3.20411600  | -0.32037800 | 3.35303900 H  |
| S | 0  | -4.40835000  | 0.70646200  | -1.95111900 H |
| H | 0  | 0.75217400   | -2.19695900 | 1.06246600 H  |
| H | 0  | 0.53907800   | 1.13985500  | -1.69285100 H |
| H | 0  | 4.71990800   | 3.08915300  | -3.41318800 H |
| H | 0  | 7.15939700   | 2.75902500  | -3.89131800 H |
| H | 0  | 8.28518100   | 0.70098200  | -3.07776100 H |
| H | 0  | 7.09873400   | -0.84100100 | -1.57180300 H |
| H | 0  | 7.04535000   | 0.31080400  | 0.40559400 H  |
| H | 0  | 8.35404600   | -0.83817400 | 2.12935000 H  |
| H | 0  | 7.45055000   | -2.86213700 | 3.23375600 H  |
| H | 0  | 5.10856400   | -3.59458100 | 2.74098200 H  |
| H | 0  | -1.59217800  | 0.24998400  | -2.00089600 H |
| H | 0  | -0.80229400  | -0.94770700 | 2.04679200 H  |
| H | 0  | -4.99711500  | -1.53747900 | 5.17449900 H  |
| H | 0  | -7.37773500  | -2.08369400 | 5.06797700 H  |
| H | 0  | -8.70721600  | -1.49117100 | 3.02507300 H  |
| H | 0  | -7.59346700  | -0.32747600 | 1.15804100 H  |
| H | 0  | -6.80587100  | 2.08840200  | 2.10693500 H  |
| H | 0  | -7.84548500  | 4.02593300  | 1.03990000 H  |
| H | 0  | -7.44762800  | 4.50529500  | -1.37358500 H |
| H | 0  | -5.85816200  | 3.08644700  | -2.63711400 H |
| C | -1 | -12.97235000 | 0.29401300  | 2.50913100 L  |
| C | -1 | -12.72860600 | -0.81125400 | 3.33637000 L  |
| C | -1 | -13.47009900 | -1.99472000 | 3.16064500 L  |
| C | -1 | -14.45242900 | -2.06625400 | 2.15810200 L  |

|   |    |              |             |               |
|---|----|--------------|-------------|---------------|
| C | -1 | -14.63973500 | -0.97823000 | 1.29166200 L  |
| C | -1 | -13.93046000 | 0.21835300  | 1.48802800 L  |
| C | -1 | -11.70559200 | -0.76474200 | 4.39978500 L  |
| C | -1 | -15.33717300 | -4.18344900 | 3.25904200 L  |
| C | -1 | -11.96013400 | -3.21722800 | 4.70300200 L  |
| N | -1 | -13.23800700 | -3.12652800 | 4.02748000 L  |
| C | -1 | -14.31281400 | -4.08071800 | 4.22679400 L  |
| C | -1 | -11.25237600 | -2.03467600 | 4.99961500 L  |
| C | -1 | -15.33443200 | -3.25145900 | 2.11041100 L  |
| C | -1 | -16.36759300 | -5.12389700 | 3.42879200 L  |
| C | -1 | -16.39917900 | -5.93390400 | 4.56522500 L  |
| C | -1 | -15.42176700 | -5.80005700 | 5.54930100 L  |
| C | -1 | -14.39530500 | -4.86813600 | 5.39319600 L  |
| C | -1 | -11.36459800 | -4.45842300 | 4.99567700 L  |
| C | -1 | -10.15661900 | -4.51077800 | 5.69262800 L  |
| C | -1 | -9.54596200  | -3.33637600 | 6.12622400 L  |
| C | -1 | -10.07685900 | -2.09828600 | 5.76104000 L  |
| O | -1 | -11.20862600 | 0.29695700  | 4.73924900 L  |
| O | -1 | -16.08861900 | -3.42658900 | 1.16730300 L  |
| C | -1 | -14.25137000 | 1.41496400  | 0.68214600 L  |
| C | -1 | -14.32322400 | 1.33366700  | -0.71200200 L |
| C | -1 | -14.64351200 | 2.46033100  | -1.47472900 L |
| C | -1 | -14.99743500 | 3.66644100  | -0.83634700 L |
| C | -1 | -14.94603800 | 3.74386800  | 0.56850900 L  |
| C | -1 | -14.53121600 | 2.63533800  | 1.31247700 L  |
| N | -1 | -15.42845700 | 4.79698700  | -1.60668500 L |
| C | -1 | -14.81267400 | 5.06318300  | -2.88166700 L |
| C | -1 | -16.47414500 | 5.65137700  | -1.09567300 L |
| C | -1 | -16.56297100 | 5.93293900  | 0.28031800 L  |
| C | -1 | -17.56621900 | 6.79014100  | 0.75434000 L  |
| C | -1 | -18.50398000 | 7.33871800  | -0.12324600 L |
| C | -1 | -18.43751500 | 7.04427300  | -1.48461400 L |
| C | -1 | -17.42867900 | 6.21044900  | -1.96973900 L |
| C | -1 | -14.59048600 | 6.39050500  | -3.29271300 L |
| C | -1 | -14.01453700 | 6.66184000  | -4.53217800 L |
| C | -1 | -13.66009700 | 5.61588400  | -5.38080300 L |
| C | -1 | -13.84853200 | 4.29411900  | -4.97637200 L |
| C | -1 | -14.40904200 | 4.00936900  | -3.72441100 L |
| S | -1 | -15.39420700 | 5.24628100  | 1.47965200 L  |
| S | -1 | -14.62089200 | 2.27092500  | -3.27498200 L |
| H | -1 | -12.40718800 | 1.20872600  | 2.64655100 L  |
| H | -1 | -15.38012700 | -1.03932300 | 0.50523700 L  |
| H | -1 | -17.15152100 | -5.22342600 | 2.68975600 L  |
| H | -1 | -17.19317500 | -6.65347000 | 4.69533600 L  |
| H | -1 | -15.46253100 | -6.41462200 | 6.43965500 L  |
| H | -1 | -13.67962100 | -4.75493500 | 6.19434200 L  |

|   |    |              |              |                |
|---|----|--------------|--------------|----------------|
| H | -1 | -11.82419200 | -5.38352000  | 4.67441700 L   |
| H | -1 | -9.69618800  | -5.46165100  | 5.91229100 L   |
| H | -1 | -8.62891200  | -3.38651400  | 6.69858400 L   |
| H | -1 | -9.53780600  | -1.19629000  | 6.01807500 L   |
| H | -1 | -14.10303200 | 0.39621900   | -1.20918400 L  |
| H | -1 | -14.48396400 | 2.70947600   | 2.39245400 L   |
| H | -1 | -17.63131700 | 7.01800700   | 1.80971800 L   |
| H | -1 | -19.28571100 | 7.98711300   | 0.25229000 L   |
| H | -1 | -19.16732400 | 7.46192600   | -2.16631900 L  |
| H | -1 | -17.39987300 | 5.99098500   | -3.02922100 L  |
| H | -1 | -14.85666500 | 7.21805700   | -2.64832600 L  |
| H | -1 | -13.84481000 | 7.68410500   | -4.83109100 L  |
| H | -1 | -13.23594200 | 5.82975200   | -6.35001500 L  |
| H | -1 | -13.54550800 | 3.48884200   | -5.63436300 L  |
| C | -1 | -6.69136800  | -11.98046000 | -3.43254800 L  |
| C | -1 | -6.49934800  | -12.91148100 | -2.40146400 L  |
| C | -1 | -7.05470300  | -14.20238300 | -2.50330900 L  |
| C | -1 | -7.84173700  | -14.52920500 | -3.62487600 L  |
| C | -1 | -7.99203200  | -13.60156900 | -4.67005500 L  |
| C | -1 | -7.40828100  | -12.32701200 | -4.58833900 L  |
| C | -1 | -5.72265400  | -12.55561900 | -1.19980300 L  |
| C | -1 | -8.55792200  | -16.67001500 | -2.44902500 L  |
| C | -1 | -5.78972600  | -14.93477800 | -0.48104600 L  |
| N | -1 | -6.86866800  | -15.16194900 | -1.43133800 L  |
| C | -1 | -7.79901400  | -16.27754900 | -1.32320000 L  |
| C | -1 | -5.29438300  | -13.62695400 | -0.28429600 L  |
| C | -1 | -8.54605400  | -15.82541300 | -3.65701800 L  |
| C | -1 | -9.40568200  | -17.78939400 | -2.37153600 L  |
| C | -1 | -9.55833400  | -18.47386300 | -1.16750800 L  |
| C | -1 | -8.91046500  | -18.01817000 | -0.02274700 L  |
| C | -1 | -8.05222900  | -16.91950000 | -0.09133800 L  |
| C | -1 | -5.17261400  | -15.99592100 | 0.21112600 L   |
| C | -1 | -4.21304300  | -15.74195200 | 1.19337100 L   |
| C | -1 | -3.81133000  | -14.43400600 | 1.45991400 L   |
| C | -1 | -4.33373800  | -13.37917800 | 0.71185700 L   |
| O | -1 | -5.40209600  | -11.39723000 | -0.99012600 L  |
| O | -1 | -9.17715600  | -16.15984800 | -4.64651400 L  |
| C | -1 | -7.48995800  | -11.38563500 | -5.73556600 L  |
| C | -1 | -8.65376000  | -11.27571800 | -6.50728700 L  |
| C | -1 | -8.66170400  | -10.51586500 | -7.68400700 L  |
| C | -1 | -7.50609900  | -9.81289000  | -8.09003500 L  |
| C | -1 | -6.40390100  | -9.79085900  | -7.21789100 L  |
| C | -1 | -6.38052000  | -10.61091400 | -6.08804600 L  |
| N | -1 | -7.44177400  | -9.18668300  | -9.38933800 L  |
| C | -1 | -8.23311200  | -9.74399000  | -10.46749400 L |
| C | -1 | -6.62348500  | -8.00740400  | -9.61733600 L  |

|    |    |              |              |                |
|----|----|--------------|--------------|----------------|
| C  | -1 | -5.50062300  | -7.71711600  | -8.81666300 L  |
| C  | -1 | -4.70777900  | -6.59412000  | -9.08388300 L  |
| C  | -1 | -5.04954500  | -5.71320900  | -10.10194300 L |
| C  | -1 | -6.18175100  | -5.95356500  | -10.86762300 L |
| C  | -1 | -6.95950400  | -7.08708500  | -10.63776400 L |
| C  | -1 | -7.73038700  | -9.78790600  | -11.78565700 L |
| C  | -1 | -8.56093000  | -10.14710800 | -12.85104000 L |
| C  | -1 | -9.90056900  | -10.45384500 | -12.61789000 L |
| C  | -1 | -10.38710900 | -10.48536400 | -11.31395900 L |
| C  | -1 | -9.54825700  | -10.18815300 | -10.23558300 L |
| S- | -1 | -4.98790200  | -8.70859700  | -7.41778700 L  |
| S- | -1 | -10.22400200 | -10.40904600 | -8.58078500 L  |
| H  | -1 | -6.27312100  | -10.98616300 | -3.33735300 L  |
| H  | -1 | -8.55693300  | -13.87613900 | -5.55241100 L  |
| H  | -1 | -9.97693000  | -18.11432900 | -3.23220800 L  |
| H  | -1 | -10.21863500 | -19.32901500 | -1.11028700 L  |
| H  | -1 | -9.08405500  | -18.51044300 | 0.92433500 L   |
| H  | -1 | -7.61613100  | -16.55903900 | 0.82905700 L   |
| H  | -1 | -5.42791900  | -17.02226800 | -0.00578100 L  |
| H  | -1 | -3.77751800  | -16.56180400 | 1.74538000 L   |
| H  | -1 | -3.06286400  | -14.24131700 | 2.21718000 L   |
| H  | -1 | -3.96277400  | -12.37671800 | 0.88840800 L   |
| H  | -1 | -9.55375900  | -11.79961500 | -6.20897800 L  |
| H  | -1 | -5.48156000  | -10.64481900 | -5.48510600 L  |
| H  | -1 | -3.83207200  | -6.38802000  | -8.48051300 L  |
| H  | -1 | -4.44836700  | -4.83295000  | -10.28335500 L |
| H  | -1 | -6.45820200  | -5.25362100  | -11.63443800 L |
| H  | -1 | -7.84692700  | -7.22012500  | -11.24014300 L |
| H  | -1 | -6.70606200  | -9.50649100  | -11.99338800 L |
| H  | -1 | -8.17561800  | -10.15876800 | -13.86094000 L |
| H  | -1 | -10.56407500 | -10.67178200 | -13.44347900 L |
| H  | -1 | -11.41799600 | -10.75555400 | -11.13843500 L |
| C  | -1 | 5.21437900   | 4.03401300   | 8.87532400 L   |
| C  | -1 | 4.53212700   | 3.43355300   | 9.94118600 L   |
| C  | -1 | 3.59304500   | 4.16314200   | 10.67896700 L  |
| C  | -1 | 3.27361400   | 5.47429200   | 10.27427500 L  |
| C  | -1 | 3.90429300   | 6.04095100   | 9.14954900 L   |
| C  | -1 | 4.87920600   | 5.32436000   | 8.42533600 L   |
| C  | -1 | 4.70149500   | 1.99778400   | 10.21444200 L  |
| C  | -1 | 1.82106000   | 5.70964100   | 12.34485700 L  |
| C  | -1 | 2.92464900   | 2.10972700   | 11.95428500 L  |
| N  | -1 | 2.92907800   | 3.56402900   | 11.82097800 L  |
| C  | -1 | 2.28273400   | 4.44689800   | 12.77463500 L  |
| C  | -1 | 3.85485500   | 1.33979400   | 11.22378900 L  |
| C  | -1 | 2.23068400   | 6.20202900   | 11.01877400 L  |
| C  | -1 | 1.06811400   | 6.51422100   | 13.21362800 L  |

|   |    |            |             |               |
|---|----|------------|-------------|---------------|
| C | -1 | 0.85170800 | 6.11470100  | 14.53223100 L |
| C | -1 | 1.40602300 | 4.92098200  | 14.99466700 L |
| C | -1 | 2.14973200 | 4.11171200  | 14.13645600 L |
| C | -1 | 1.97490700 | 1.43127600  | 12.75006900 L |
| C | -1 | 2.06285900 | 0.05123800  | 12.94339000 L |
| C | -1 | 3.01324400 | -0.69430100 | 12.25342500 L |
| C | -1 | 3.89989700 | -0.05782600 | 11.38932700 L |
| O | -1 | 5.45680400 | 1.33774300  | 9.52578500 L  |
| O | -1 | 1.73298700 | 7.21535800  | 10.55533900 L |
| C | -1 | 5.41817600 | 5.83736200  | 7.11923100 L  |
| C | -1 | 5.43395900 | 7.20652700  | 6.81067000 L  |
| C | -1 | 5.69465200 | 7.64973000  | 5.50522400 L  |
| C | -1 | 5.92955600 | 6.71914900  | 4.46912800 L  |
| C | -1 | 6.02981900 | 5.35644200  | 4.79907300 L  |
| C | -1 | 5.81317700 | 4.94015300  | 6.11259700 L  |
| N | -1 | 6.04550200 | 7.16064800  | 3.10514300 L  |
| C | -1 | 5.30823400 | 8.32729200  | 2.68109400 L  |
| C | -1 | 6.77043100 | 6.39274000  | 2.11741700 L  |
| C | -1 | 6.76540200 | 4.98860900  | 2.14174000 L  |
| C | -1 | 7.14518000 | 4.27037000  | 0.99943300 L  |
| C | -1 | 7.58138300 | 4.93772600  | -0.14484500 L |
| C | -1 | 7.73539900 | 6.32263000  | -0.12036200 L |
| C | -1 | 7.36053500 | 7.04498500  | 1.01299800 L  |
| C | -1 | 4.72457000 | 8.37375400  | 1.39742800 L  |
| C | -1 | 4.20654500 | 9.56481400  | 0.89758000 L  |
| C | -1 | 4.19430800 | 10.70605300 | 1.69863300 L  |
| C | -1 | 4.68450100 | 10.65015400 | 3.00320600 L  |
| C | -1 | 5.21772900 | 9.45862600  | 3.50872300 L  |
| S | -1 | 6.28958900 | 4.03198900  | 3.58895100 L  |
| S | -1 | 5.75020300 | 9.43960400  | 5.23242700 L  |
| H | -1 | 5.97629400 | 3.46019400  | 8.37170500 L  |
| H | -1 | 3.59503400 | 7.02362500  | 8.82193500 L  |
| H | -1 | 0.66702800 | 7.45787500  | 12.87448600 L |
| H | -1 | 0.28154600 | 6.74408900  | 15.20323100 L |
| H | -1 | 1.26353500 | 4.61876400  | 16.02064800 L |
| H | -1 | 2.60568200 | 3.21722000  | 14.54044300 L |
| H | -1 | 1.15797900 | 1.95123400  | 13.22735300 L |
| H | -1 | 1.39542900 | -0.44117900 | 13.63617600 L |
| H | -1 | 3.04747100 | -1.77003400 | 12.37065500 L |
| H | -1 | 4.61028200 | -0.66052900 | 10.84109200 L |
| H | -1 | 5.21448800 | 7.93775200  | 7.57508500 L  |
| H | -1 | 5.84188700 | 3.87822600  | 6.29481300 L  |
| H | -1 | 7.09674300 | 3.18897000  | 0.99459000 L  |
| H | -1 | 7.85050600 | 4.37642400  | -1.03150300 L |
| H | -1 | 8.13805000 | 6.83807800  | -0.98177300 L |
| H | -1 | 7.45716900 | 8.12449900  | 1.00014300 L  |



|   |    |             |             |                |
|---|----|-------------|-------------|----------------|
| H | -1 | 4.70215200  | 7.49354800  | 0.76720200 L   |
| H | -1 | 3.81698300  | 9.59812500  | -0.11209100 L  |
| H | -1 | 3.78985200  | 11.63150700 | 1.31904500 L   |
| H | -1 | 4.64355800  | 11.53656500 | 3.62377500 L   |
| C | -1 | 8.74326000  | 9.47324600  | -7.53192000 L  |
| C | -1 | 9.73134000  | 9.24805500  | -8.50674200 L  |
| C | -1 | 9.91480200  | 10.18629900 | -9.53817700 L  |
| C | -1 | 9.18439200  | 11.38767100 | -9.52857500 L  |
| C | -1 | 8.24060700  | 11.62609800 | -8.52342400 L  |
| C | -1 | 7.95244800  | 10.63614700 | -7.56971800 L  |
| C | -1 | 10.53254600 | 8.00455800  | -8.52317700 L  |
| C | -1 | 9.74988400  | 11.71002100 | -11.96661900 L |
| C | -1 | 11.79269700 | 8.85759500  | -10.49723300 L |
| N | -1 | 10.77437800 | 9.87695400  | -10.66034500 L |
| C | -1 | 10.45948400 | 10.48922700 | -11.94130300 L |
| C | -1 | 11.63580600 | 7.87018600  | -9.50007900 L  |
| C | -1 | 9.28673000  | 12.28298000 | -10.69272200 L |
| C | -1 | 9.35634100  | 12.27461000 | -13.18996600 L |
| C | -1 | 9.66752700  | 11.63762700 | -14.38995800 L |
| C | -1 | 10.33098000 | 10.41225200 | -14.37540000 L |
| C | -1 | 10.70795900 | 9.82886000  | -13.16144100 L |
| C | -1 | 12.96404200 | 8.85651700  | -11.28000000 L |
| C | -1 | 13.89248900 | 7.81852900  | -11.16415500 L |
| C | -1 | 13.67836000 | 6.78578000  | -10.25032700 L |
| C | -1 | 12.56399400 | 6.81689500  | -9.40824100 L  |
| O | -1 | 10.31334700 | 7.11770100  | -7.71408500 L  |
| O | -1 | 8.93096600  | 13.44737200 | -10.62255400 L |
| C | -1 | 6.68164000  | 10.69803800 | -6.80380100 L  |
| C | -1 | 5.51210700  | 11.10926100 | -7.45998500 L  |
| C | -1 | 4.26017500  | 10.96114700 | -6.86656800 L  |
| C | -1 | 4.15101200  | 10.36309900 | -5.59996300 L  |
| C | -1 | 5.32505900  | 10.01164300 | -4.90155200 L  |
| C | -1 | 6.58113000  | 10.19022600 | -5.49978600 L  |
| N | -1 | 2.86589600  | 9.99804500  | -5.07577200 L  |
| C | -1 | 1.69982200  | 10.79937800 | -5.35951000 L  |
| C | -1 | 2.74779900  | 8.74249800  | -4.37582400 L  |
| C | -1 | 3.74699400  | 8.33588100  | -3.47235600 L  |
| C | -1 | 3.60941000  | 7.12985900  | -2.77268600 L  |
| C | -1 | 2.52497400  | 6.28820100  | -3.02765500 L  |
| C | -1 | 1.56975100  | 6.65030700  | -3.97811900 L  |
| C | -1 | 1.66740400  | 7.87839400  | -4.63597500 L  |
| C | -1 | 0.65483800  | 10.88758300 | -4.41931700 L  |
| C | -1 | -0.51004200 | 11.60135600 | -4.71502800 L  |
| C | -1 | -0.64430200 | 12.24290800 | -5.94347800 L  |
| C | -1 | 0.38911700  | 12.17598600 | -6.87481100 L  |
| C | -1 | 1.56615100  | 11.47641400 | -6.58577100 L  |

|   |    |             |              |                |
|---|----|-------------|--------------|----------------|
| S | -1 | 5.26279100  | 9.29485300   | -3.23671400 L  |
| S | -1 | 2.83458800  | 11.44661900  | -7.86560700 L  |
| H | -1 | 8.52911200  | 8.70106500   | -6.80395000 L  |
| H | -1 | 7.64484400  | 12.53080500  | -8.55761800 L  |
| H | -1 | 8.74670100  | 13.16730100  | -13.21352500 L |
| H | -1 | 9.35237200  | 12.07051400  | -15.33060500 L |
| H | -1 | 10.51693000 | 9.89895200   | -15.30801800 L |
| H | -1 | 11.14750100 | 8.84247100   | -13.17804100 L |
| H | -1 | 13.16156500 | 9.65831000   | -11.97944000 L |
| H | -1 | 14.78053600 | 7.81602600   | -11.78232500 L |
| H | -1 | 14.39301800 | 5.97611700   | -10.17331500 L |
| H | -1 | 12.44261600 | 6.03426100   | -8.66937300 L  |
| H | -1 | 5.55762300  | 11.47781700  | -8.47739600 L  |
| H | -1 | 7.47252600  | 9.88138000   | -4.96776200 L  |
| H | -1 | 4.36919500  | 6.82011900   | -2.06561600 L  |
| H | -1 | 2.43586200  | 5.34602000   | -2.50334800 L  |
| H | -1 | 0.74748400  | 5.98219500   | -4.20019300 L  |
| H | -1 | 0.91357700  | 8.14475300   | -5.36561800 L  |
| H | -1 | 0.74083600  | 10.39410100  | -3.46181100 L  |
| H | -1 | -1.31632100 | 11.65200800  | -3.99960200 L  |
| H | -1 | -1.54991000 | 12.78852700  | -6.17676100 L  |
| H | -1 | 0.27499700  | 12.66928600  | -7.82802800 L  |
| C | -1 | -2.54497400 | -12.61822000 | -6.55698400 L  |
| C | -1 | -3.03278800 | -13.66186500 | -7.35737900 L  |
| C | -1 | -3.57922800 | -13.37991800 | -8.62524100 L  |
| C | -1 | -3.58078300 | -12.05320800 | -9.09250600 L  |
| C | -1 | -3.01978300 | -11.03728400 | -8.31356400 L  |
| C | -1 | -2.57129000 | -11.29028100 | -7.00884000 L  |
| C | -1 | -2.95216000 | -15.05998500 | -6.89789500 L  |
| C | -1 | -4.85275000 | -12.80049200 | -11.15560900 L |
| C | -1 | -3.67161100 | -15.81767900 | -9.15249500 L  |
| N | -1 | -4.06693800 | -14.45162300 | -9.47069800 L  |
| C | -1 | -4.88929800 | -14.11067800 | -10.62595500 L |
| C | -1 | -3.28426900 | -16.14579600 | -7.83583600 L  |
| C | -1 | -4.13405200 | -11.74962500 | -10.42419700 L |
| C | -1 | -5.49444700 | -12.51064100 | -12.37303700 L |
| C | -1 | -6.15936800 | -13.51599100 | -13.06920100 L |
| C | -1 | -6.26109800 | -14.79036900 | -12.51403000 L |
| C | -1 | -5.71096300 | -15.06067800 | -11.26290400 L |
| C | -1 | -3.57391100 | -16.82203200 | -10.13902600 L |
| C | -1 | -3.36213400 | -18.15428400 | -9.77858000 L  |
| C | -1 | -3.18630100 | -18.49418400 | -8.43845600 L  |
| C | -1 | -3.10211300 | -17.49225100 | -7.47273200 L  |
| O | -1 | -2.53152900 | -15.31818500 | -5.78150300 L  |
| O | -1 | -4.00335500 | -10.63808500 | -10.91184300 L |
| C | -1 | -2.27746100 | -10.16164600 | -6.08060400 L  |

|   |    |             |              |                |
|---|----|-------------|--------------|----------------|
| C | -1 | -1.81067700 | -8.92500700  | -6.55936200 L  |
| C | -1 | -1.75598400 | -7.80149400  | -5.72601300 L  |
| C | -1 | -2.14100600 | -7.91171000  | -4.37873300 L  |
| C | -1 | -2.53529300 | -9.16382200  | -3.87543400 L  |
| C | -1 | -2.61940700 | -10.26579400 | -4.72362500 L  |
| N | -1 | -2.22122600 | -6.75236000  | -3.54058300 L  |
| C | -1 | -1.31209100 | -5.65040100  | -3.71928300 L  |
| C | -1 | -3.31204200 | -6.66069500  | -2.60112800 L  |
| C | -1 | -3.72398800 | -7.79283200  | -1.87549700 L  |
| C | -1 | -4.78101200 | -7.69634700  | -0.96324700 L  |
| C | -1 | -5.50031900 | -6.50768900  | -0.84858700 L  |
| C | -1 | -5.14715700 | -5.40228400  | -1.62460000 L  |
| C | -1 | -4.03491300 | -5.46206100  | -2.46369300 L  |
| C | -1 | -0.90761600 | -4.89315400  | -2.60692200 L  |
| C | -1 | -0.14502000 | -3.73570600  | -2.77050100 L  |
| C | -1 | 0.24644500  | -3.33755600  | -4.04627300 L  |
| C | -1 | -0.09396000 | -4.11644400  | -5.15469300 L  |
| C | -1 | -0.85658400 | -5.28335200  | -4.99802500 L  |
| S | -1 | -2.96691100 | -9.40915300  | -2.13372500 L  |
| S | -1 | -1.25729400 | -6.23195300  | -6.48608000 L  |
| H | -1 | -2.14035900 | -12.84499900 | -5.58096600 L  |
| H | -1 | -2.99699300 | -10.03595800 | -8.71490600 L  |
| H | -1 | -5.45666500 | -11.51643900 | -12.79991400 L |
| H | -1 | -6.60087800 | -13.30403800 | -14.03499000 L |
| H | -1 | -6.74590600 | -15.58471000 | -13.06078200 L |
| H | -1 | -5.89344700 | -16.03281300 | -10.82782300 L |
| H | -1 | -3.65701100 | -16.58491300 | -11.19006100 L |
| H | -1 | -3.34003400 | -18.92380100 | -10.53957800 L |
| H | -1 | -3.06194700 | -19.52948600 | -8.15555200 L  |
| H | -1 | -2.86661600 | -17.76642100 | -6.45160300 L  |
| H | -1 | -1.51367400 | -8.81439600  | -7.59402800 L  |
| H | -1 | -3.03092100 | -11.18449200 | -4.32692000 L  |
| H | -1 | -5.08222800 | -8.55905900  | -0.38214200 L  |
| H | -1 | -6.34552400 | -6.45653100  | -0.17675800 L  |
| H | -1 | -5.73281300 | -4.49579800  | -1.58161500 L  |
| H | -1 | -3.76861400 | -4.58882100  | -3.04491300 L  |
| H | -1 | -1.18970700 | -5.20798200  | -1.61363800 L  |
| H | -1 | 0.15453800  | -3.15591100  | -1.90744500 L  |
| H | -1 | 0.83380100  | -2.43820000  | -4.17137900 L  |
| H | -1 | 0.23902100  | -3.81161000  | -6.13873300 L  |
| C | -1 | 7.59185800  | 2.59640900   | -12.65721600 L |
| C | -1 | 8.28186300  | 1.40467200   | -12.92057500 L |
| C | -1 | 8.10726200  | 0.29580000   | -12.07827800 L |
| C | -1 | 7.22959600  | 0.38025600   | -10.98772500 L |
| C | -1 | 6.46101200  | 1.53374100   | -10.79854600 L |
| C | -1 | 6.62179500  | 2.65604300   | -11.63515300 L |

|   |    |             |             |                |
|---|----|-------------|-------------|----------------|
| C | -1 | 9.11044100  | 1.24757700  | -14.13062700 L |
| C | -1 | 8.17569200  | -1.80381400 | -10.12193600 L |
| C | -1 | 9.20637500  | -1.20463500 | -13.72390500 L |
| N | -1 | 8.79852200  | -0.94345800 | -12.35482400 L |
| C | -1 | 9.02206600  | -1.86248400 | -11.25227800 L |
| C | -1 | 9.41187400  | -0.11743100 | -14.60286700 L |
| C | -1 | 7.13473600  | -0.76272500 | -10.06236000 L |
| C | -1 | 8.38847900  | -2.66535100 | -9.03528500 L  |
| C | -1 | 9.45747300  | -3.55848000 | -9.05064400 L  |
| C | -1 | 10.32462200 | -3.59763200 | -10.14227400 L |
| C | -1 | 10.11924300 | -2.74698600 | -11.23168900 L |
| C | -1 | 9.32168600  | -2.51524400 | -14.22817000 L |
| C | -1 | 9.73775900  | -2.73440000 | -15.54492900 L |
| C | -1 | 9.99913400  | -1.65367800 | -16.38805200 L |
| C | -1 | 9.81546200  | -0.34972900 | -15.92756500 L |
| O | -1 | 9.49459600  | 2.22176300  | -14.75619500 L |
| O | -1 | 6.24005000  | -0.82393300 | -9.23477700 L  |
| C | -1 | 5.71495400  | 3.83939600  | -11.50397500 L |
| C | -1 | 5.06700300  | 4.12786200  | -10.28821100 L |
| C | -1 | 4.17014500  | 5.19260000  | -10.17900800 L |
| C | -1 | 3.97244400  | 6.04966400  | -11.27173400 L |
| C | -1 | 4.60378900  | 5.77126300  | -12.49565800 L |
| C | -1 | 5.42912600  | 4.65317600  | -12.61638700 L |
| N | -1 | 3.17171700  | 7.22619100  | -11.13362100 L |
| C | -1 | 1.98884400  | 7.20167200  | -10.31536700 L |
| C | -1 | 3.60439400  | 8.43347300  | -11.78635700 L |
| C | -1 | 4.15745600  | 8.38390800  | -13.07846200 L |
| C | -1 | 4.56975900  | 9.56630200  | -13.70660100 L |
| C | -1 | 4.49257800  | 10.78696400 | -13.03113100 L |
| C | -1 | 3.99590600  | 10.83173000 | -11.72746000 L |
| C | -1 | 3.53571800  | 9.66490300  | -11.11455000 L |
| C | -1 | 0.84350100  | 7.91281000  | -10.71396200 L |
| C | -1 | -0.30452700 | 7.90922500  | -9.91896100 L  |
| C | -1 | -0.31072900 | 7.22464000  | -8.70452000 L  |
| C | -1 | 0.81452600  | 6.50039200  | -8.30763700 L  |
| C | -1 | 1.95287000  | 6.45470800  | -9.12405100 L  |
| S | -1 | 4.36971000  | 6.81684700  | -13.95995900 L |
| S | -1 | 3.33912500  | 5.42650100  | -8.58287200 L  |
| H | -1 | 7.77850700  | 3.45403600  | -13.28733700 L |
| H | -1 | 5.71725600  | 1.52751900  | -10.01600000 L |
| H | -1 | 7.75253500  | -2.62060100 | -8.15976100 L  |
| H | -1 | 9.63008300  | -4.19570000 | -8.19875500 L  |
| H | -1 | 11.16705600 | -4.27773200 | -10.13715900 L |
| H | -1 | 10.83150800 | -2.77143500 | -12.04224500 L |
| H | -1 | 9.07632700  | -3.37048700 | -13.61382400 L |
| H | -1 | 9.84552000  | -3.74507400 | -15.91675100 L |

|   |    |              |             |              |   |
|---|----|--------------|-------------|--------------|---|
| H | -1 | 10.31331500  | -1.82669600 | -17.40956000 | L |
| H | -1 | 9.95217200   | 0.47437900  | -16.61390600 | L |
| H | -1 | 5.25887900   | 3.54036700  | -9.40370700  | L |
| H | -1 | 5.84250100   | 4.43349600  | -13.59023500 | L |
| H | -1 | 4.98158000   | 9.53533600  | -14.70753200 | L |
| H | -1 | 4.82927400   | 11.69572400 | -13.51338500 | L |
| H | -1 | 3.95725800   | 11.77247000 | -11.19380200 | L |
| H | -1 | 3.14561800   | 9.71211900  | -10.10820000 | L |
| H | -1 | 0.83640400   | 8.45028300  | -11.65331800 | L |
| H | -1 | -1.19146500  | 8.43490600  | -10.24424400 | L |
| H | -1 | -1.19398800  | 7.24058400  | -8.07924700  | L |
| H | -1 | 0.78912800   | 5.95030200  | -7.37529400  | L |
| C | -1 | -6.53669700  | 6.68321800  | -3.57216600  | L |
| C | -1 | -5.40131900  | 6.31984200  | -2.83631800  | L |
| C | -1 | -5.29717800  | 6.65987000  | -1.47748700  | L |
| C | -1 | -6.37054500  | 7.33378300  | -0.86129700  | L |
| C | -1 | -7.51990100  | 7.67048400  | -1.59977900  | L |
| C | -1 | -7.60324100  | 7.36776000  | -2.96702800  | L |
| C | -1 | -4.29823500  | 5.59332700  | -3.47444800  | L |
| C | -1 | -4.89578400  | 7.76986400  | 1.14382800   | L |
| C | -1 | -3.19590900  | 5.31344200  | -1.26148100  | L |
| N | -1 | -4.08517100  | 6.35073700  | -0.73041200  | L |
| C | -1 | -3.82136500  | 7.12636200  | 0.48052100   | L |
| C | -1 | -3.28921800  | 4.94961300  | -2.62626900  | L |
| C | -1 | -6.23680800  | 7.73761900  | 0.54160800   | L |
| C | -1 | -4.67396000  | 8.48871600  | 2.33023700   | L |
| C | -1 | -3.38492900  | 8.62357500  | 2.83863600   | L |
| C | -1 | -2.30651900  | 8.06520100  | 2.15602500   | L |
| C | -1 | -2.51780800  | 7.33495700  | 0.98272400   | L |
| C | -1 | -2.26199200  | 4.61823200  | -0.45950000  | L |
| C | -1 | -1.42987300  | 3.63713700  | -1.00799900  | L |
| C | -1 | -1.50771300  | 3.32899100  | -2.36370000  | L |
| C | -1 | -2.43775800  | 3.97410800  | -3.16869900  | L |
| O | -1 | -4.20273800  | 5.55138700  | -4.68941100  | L |
| O | -1 | -7.21463200  | 8.08837100  | 1.18059400   | L |
| C | -1 | -8.76562200  | 7.80690700  | -3.78849200  | L |
| C | -1 | -9.34426500  | 9.07615900  | -3.61217000  | L |
| C | -1 | -10.35953400 | 9.52603800  | -4.47054500  | L |
| C | -1 | -10.77871700 | 8.72510900  | -5.54513600  | L |
| C | -1 | -10.18479000 | 7.46866200  | -5.73826800  | L |
| C | -1 | -9.22983000  | 6.99800800  | -4.83572600  | L |
| N | -1 | -11.76303500 | 9.20903200  | -6.47101400  | L |
| C | -1 | -12.84647300 | 10.02968000 | -5.99594500  | L |
| C | -1 | -11.57625700 | 8.96738800  | -7.87837900  | L |
| C | -1 | -10.99615300 | 7.76539600  | -8.32097600  | L |
| C | -1 | -10.77383600 | 7.55660000  | -9.68645000  | L |

|   |    |              |             |                |
|---|----|--------------|-------------|----------------|
| C | -1 | -11.12320900 | 8.53687600  | -10.61437600 L |
| C | -1 | -11.72828400 | 9.71773400  | -10.18724400 L |
| C | -1 | -11.93161500 | 9.94654700  | -8.82632800 L  |
| C | -1 | -14.13685500 | 9.89681500  | -6.54268600 L  |
| C | -1 | -15.17239600 | 10.73730900 | -6.12457900 L  |
| C | -1 | -14.92992600 | 11.71352100 | -5.15623200 L  |
| C | -1 | -13.65651300 | 11.84045700 | -4.59631900 L  |
| C | -1 | -12.61974600 | 10.98878500 | -4.99753400 L  |
| S | -1 | -10.55794700 | 6.43952800  | -7.17597200 L  |
| S | -1 | -10.99104900 | 11.20795600 | -4.24828100 L  |
| H | -1 | -6.57663100  | 6.44761700  | -4.62696800 L  |
| H | -1 | -8.33675600  | 8.19121800  | -1.11522400 L  |
| H | -1 | -5.49513000  | 8.97175100  | 2.84705800 L   |
| H | -1 | -3.22092700  | 9.18533600  | 3.74895900 L   |
| H | -1 | -1.30118400  | 8.21155800  | 2.53068000 L   |
| H | -1 | -1.64981500  | 6.95899900  | 0.47036400 L   |
| H | -1 | -2.16830000  | 4.80754900  | 0.59456200 L   |
| H | -1 | -0.72591900  | 3.11005000  | -0.37850600 L  |
| H | -1 | -0.85742600  | 2.58284900  | -2.79812800 L  |
| H | -1 | -2.50692700  | 3.69525200  | -4.21280100 L  |
| H | -1 | -8.98272600  | 9.73564100  | -2.83310700 L  |
| H | -1 | -8.80843500  | 6.01427000  | -4.98849900 L  |
| H | -1 | -10.33967000 | 6.62732200  | -10.03334500 L |
| H | -1 | -10.95168400 | 8.36512400  | -11.66750000 L |
| H | -1 | -12.04702600 | 10.45284400 | -10.91048000 L |
| H | -1 | -12.35648400 | 10.89199300 | -8.51353000 L  |
| H | -1 | -14.33635900 | 9.13972600  | -7.28943200 L  |
| H | -1 | -16.15986200 | 10.63866500 | -6.55724800 L  |
| H | -1 | -15.72675000 | 12.37363000 | -4.83973100 L  |
| H | -1 | -13.47665600 | 12.59907700 | -3.84427400 L  |
| C | -1 | -2.51301300  | 9.27626000  | 9.20989600 L   |
| C | -1 | -3.79525900  | 9.74829800  | 9.52716300 L   |
| C | -1 | -4.83629800  | 8.83855000  | 9.76179100 L   |
| C | -1 | -4.59811100  | 7.46210800  | 9.70084300 L   |
| C | -1 | -3.32015200  | 6.99745300  | 9.39204400 L   |
| C | -1 | -2.25848100  | 7.89152800  | 9.13722900 L   |
| C | -1 | -4.08598300  | 11.18788800 | 9.66497300 L   |
| C | -1 | -7.09827600  | 7.06959200  | 9.70820400 L   |
| C | -1 | -6.28793900  | 10.62949600 | 10.65881600 L  |
| N | -1 | -6.15949200  | 9.31991600  | 10.06081400 L  |
| C | -1 | -7.28162900  | 8.46956400  | 9.73560900 L   |
| C | -1 | -5.28856800  | 11.59378700 | 10.41479700 L  |
| C | -1 | -5.73395300  | 6.53791500  | 9.88718400 L   |
| C | -1 | -8.16488700  | 6.22766800  | 9.35857000 L   |
| C | -1 | -9.36527000  | 6.77844500  | 8.91270800 L   |
| C | -1 | -9.50373300  | 8.16381900  | 8.82170200 L   |

|   |    |              |             |               |
|---|----|--------------|-------------|---------------|
| C | -1 | -8.49051400  | 9.00976100  | 9.27181300 L  |
| C | -1 | -7.31381000  | 10.92143900 | 11.57293200 L |
| C | -1 | -7.36726400  | 12.17611300 | 12.18726200 L |
| C | -1 | -6.44141600  | 13.16529500 | 11.85288500 L |
| C | -1 | -5.39867200  | 12.87681200 | 10.97225400 L |
| O | -1 | -3.33454200  | 12.02431100 | 9.19724400 L  |
| O | -1 | -5.54696500  | 5.35863200  | 10.13626900 L |
| C | -1 | -0.93651900  | 7.36056100  | 8.68940500 L  |
| C | -1 | -0.57298300  | 6.03444700  | 8.97114200 L  |
| C | -1 | 0.41754200   | 5.38635100  | 8.23214000 L  |
| C | -1 | 1.10677400   | 6.08414800  | 7.22774800 L  |
| C | -1 | 0.96009300   | 7.48540300  | 7.17889700 L  |
| C | -1 | -0.08308600  | 8.10972600  | 7.86434200 L  |
| N | -1 | 1.79851700   | 5.39818900  | 6.16337300 L  |
| C | -1 | 2.29413900   | 4.03584900  | 6.32172900 L  |
| C | -1 | 1.78900900   | 6.04740400  | 4.85903200 L  |
| C | -1 | 1.93998900   | 7.44396800  | 4.73548500 L  |
| C | -1 | 1.92515000   | 8.05173400  | 3.47388400 L  |
| C | -1 | 1.70926800   | 7.28811400  | 2.32796100 L  |
| C | -1 | 1.49295600   | 5.91933800  | 2.43943200 L  |
| C | -1 | 1.52160600   | 5.31207300  | 3.69555200 L  |
| C | -1 | 3.22633300   | 3.50863700  | 5.40165200 L  |
| C | -1 | 3.69915800   | 2.20071300  | 5.50547100 L  |
| C | -1 | 3.25533700   | 1.38107600  | 6.53336600 L  |
| C | -1 | 2.35645200   | 1.87859400  | 7.46968500 L  |
| C | -1 | 1.87691700   | 3.19353900  | 7.37871600 L  |
| S | -1 | 2.04964500   | 8.51111600  | 6.17404800 L  |
| S | -1 | 0.69570200   | 3.65975900  | 8.64717200 L  |
| H | -1 | -1.71385500  | 9.98999500  | 9.06679800 L  |
| H | -1 | -3.18398000  | 5.93493000  | 9.29369000 L  |
| H | -1 | -8.04598000  | 5.15217400  | 9.35866900 L  |
| H | -1 | -10.16664900 | 6.13088800  | 8.58584100 L  |
| H | -1 | -10.38836900 | 8.58526400  | 8.37922300 L  |
| H | -1 | -8.62374500  | 10.08139900 | 9.19389900 L  |
| H | -1 | -8.03896500  | 10.16691400 | 11.84706900 L |
| H | -1 | -8.11205800  | 12.37848300 | 12.94074000 L |
| H | -1 | -6.51133700  | 14.14541800 | 12.30503200 L |
| H | -1 | -4.64921200  | 13.63273800 | 10.77485800 L |
| H | -1 | -1.09974100  | 5.46871600  | 9.72675700 L  |
| H | -1 | -0.26568400  | 9.15536100  | 7.66473100 L  |
| H | -1 | 2.04202700   | 9.12424600  | 3.38470600 L  |
| H | -1 | 1.69280600   | 7.75622900  | 1.35515100 L  |
| H | -1 | 1.30669200   | 5.32999200  | 1.55173100 L  |
| H | -1 | 1.34941100   | 4.26130900  | 3.77479500 L  |
| H | -1 | 3.60534400   | 4.11400800  | 4.59527500 L  |
| H | -1 | 4.41917500   | 1.82657900  | 4.79063400 L  |

|   |    |            |            |              |
|---|----|------------|------------|--------------|
| H | -1 | 3.60792900 | 0.36073900 | 6.60623600 L |
| H | -1 | 2.02305200 | 1.23154300 | 8.27171100 L |

## References

1. K. Zhang, Y. Zhang, Y. Ma, J. Fan, C.-K. Wang and L. Lin, *J. Phys. Chem. A*, 2020, **124**, 8540-8550.
2. Z. Wei, S. Lin, T. Zuo, Q. Li, S. Jiang, F. Qi, M. Yang, J. Gu, L. Meng and C. Z. Lu, *Phys. Chem. Chem. Phys.*, 2021, **23**, 25789-25796.
3. Y. Niu, W. Li, Q. Peng, H. Geng, Y. Yi, L. Wang, G. Nan, D. Wang and Z. Shuai, *Mol. Phys.*, 2018, **116**, 1078-1090.
4. Q. Peng, Y. Niu, Q. Shi, X. Gao and Z. Shuai, *J. Chem. Theory Comput.*, 2013, **9**, 1132-1143.
5. Y. Niu, Q. Peng, C. Deng, X. Gao and Z. Shuai, *J. Phys. Chem. A* 2010, **114**, 7817–7831.
6. X.-W. Sun, L.-Y. Peng, Y.-J. Gao, J.-T. Ye and G. Cui, *New J. Chem.*, 2022, **46**, 15678-15685.
